# Supplementary material for: Exploiting thiol-functionalized benzosiloxaboroles for achieving diverse substitution patterns – synthesis, characterization and biological evaluation of promising antibacterial agents
Source: Royal Society of Chemistry journal article supplement (doi:10.1039/d4md00061g), 2024-01-01

## Exploiting thiol-functionalized benzosiloxaboroles for achieving diverse substitution patterns – synthesis, characterization and biological evaluation of promising antibacterial agents

Krzysztof Nowicki,<sup>a,\*</sup> Joanna Krajewska,<sup>b</sup> Tomasz M. Stępniewski,<sup>c</sup> Monika Wielechowska,<sup>a</sup> Patrycja Wińska,<sup>a</sup> Anna Kaczmarczyk,<sup>a</sup> Julia Korpowska,<sup>a</sup> Jana Selent,<sup>c</sup> Paulina H. Marek-Urban,<sup>a</sup> Krzysztof Durka,<sup>a</sup> Krzysztof Woźniak,<sup>d</sup> Agnieszka E. Laudy,<sup>b,\*</sup> Sergiusz Luliński<sup>a,\*</sup>

<sup>a</sup>*Faculty of Chemistry, Warsaw University of Technology, Noakowskiego 3, 00-664 Warsaw, Poland*

<sup>b</sup>*Department of Pharmaceutical Microbiology and Bioanalysis, Medical University of Warsaw, Banacha 1b, 02-097, Warsaw, Poland*

<sup>c</sup>*GPCR Drug Discovery Lab, Research Programme on Biomedical Informatics (GRIB), Hospital del Mar Medical Research Institute (IMIM) - Department of Medicine and Life Sciences, Pompeu Fabra University (UPF), Carrer del Dr. Aiguader, 88, 08003 Barcelona, Spain*

<sup>d</sup>*Faculty of Chemistry, University of Warsaw, Pasteura 1, 00-093 Warsaw, Poland*

\*Corresponding authors. Email addresses: [krzysztof.nowicki2.dokt@pw.edu.pl](mailto:krzysztof.nowicki2.dokt@pw.edu.pl) (K. Nowicki), [aludy@wp.pl](mailto:aludy@wp.pl) (A. E. Laudy), [sergiusz.lulinski@pw.edu.pl](mailto:sergiusz.lulinski@pw.edu.pl) (S. Luliński).

### Supporting Information

#### List of contents

|                                           |     |
|-------------------------------------------|-----|
| 1. Synthesis.....                         | S2  |
| 2. Antimicrobial activity.....            | S6  |
| 3. Cytotoxicity.....                      | S8  |
| 4. Purification of MRSA LeuRS .....       | S10 |
| 5. Single-crystal X-ray diffraction ..... | S11 |
| 6. References.....                        | S21 |
| 7. NMR spectra.....                       | S22 |

## 1. Synthesis

Compounds **1b\_CH2** and **1b\_D** were isolated as byproducts in the synthesis of **1b** (**Scheme S1**). The extensive formation of **1b\_CH2** is intriguing but not fully clear. It was rationalized by the reaction of **1b\_D** with lithium enolate formed from LDA-induced cleavage of THF according to the mechanism proposed for a similar transformation<sup>1</sup> (**Scheme S2**).

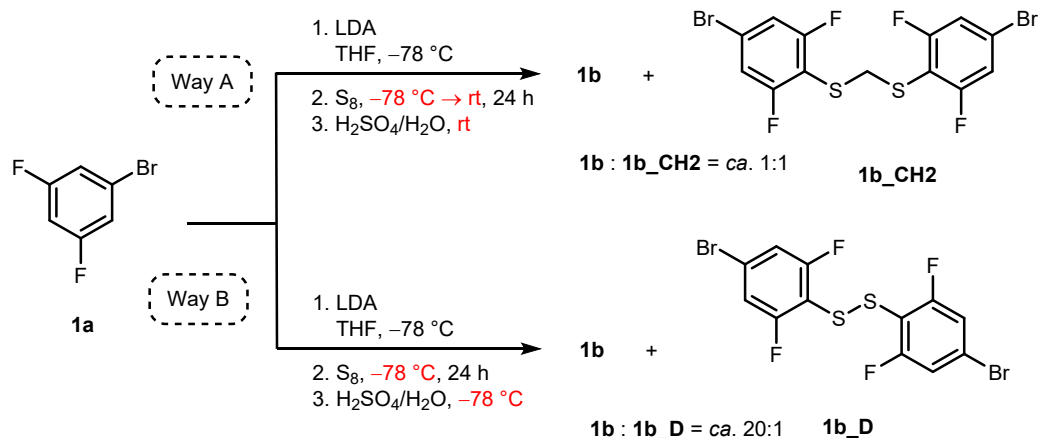

**Scheme S1.** The first stage of the synthesis of the precursor **1b** carried out under different conditions.

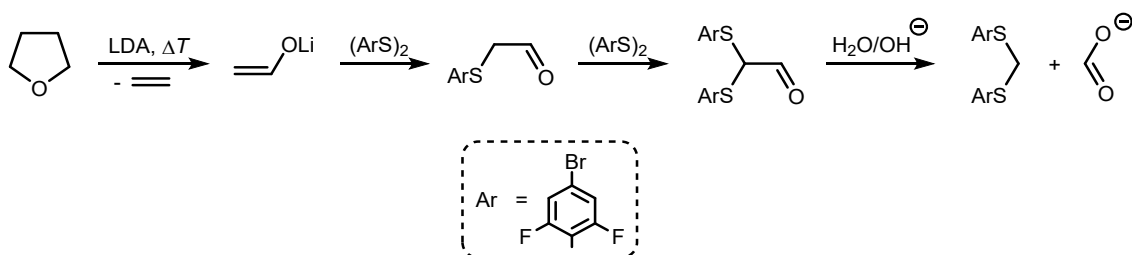

**Scheme S2.** The plausible mechanism of the formation of **1b\_CH2** initiated by THF ring cleavage under the influence of LDA at increased temperature.

Succinimidyl acrylate (**S1**) and functionalized acrylamides (**S2–S4**) were obtained as described in the literature,<sup>2–5</sup> *i.e.*, by *O*- or *N*-acylation of respective starting materials with acryloyl chloride in the presence of Et<sub>3</sub>N (**Scheme S3**).

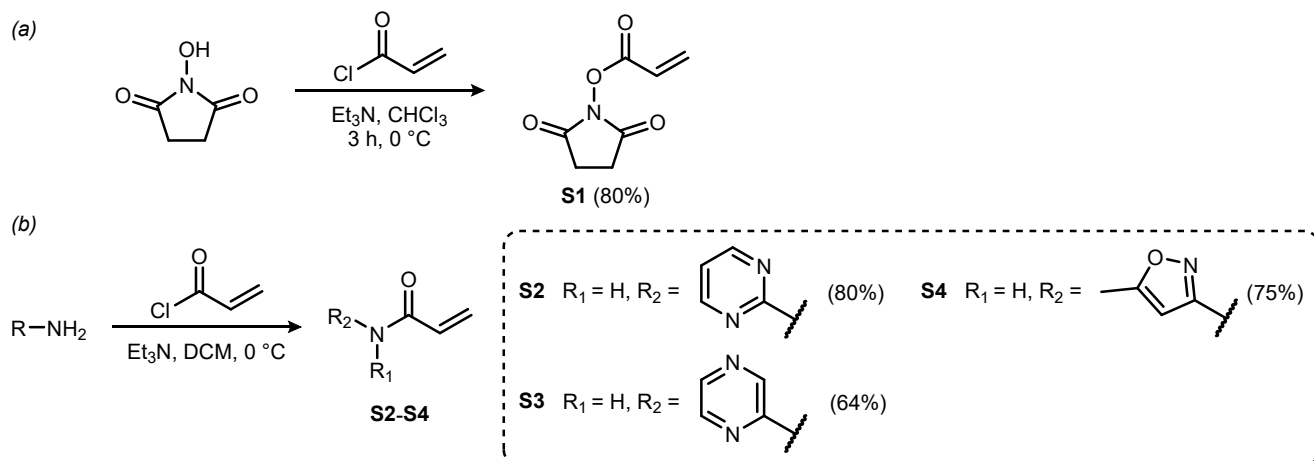

**Scheme S3.** Synthesis of Michael acceptors (**S1–S4**) used in reaction leading to benzosiloxaboroles: **5** (a) and **9–11** (b).

*N*-Aryl maleimides were obtained utilizing two-step protocol described in the literature,<sup>6,7</sup> *i.e.*, by the reaction of maleic anhydride with appropriate arylamines followed by the treatment of resultant intermediate by sodium acetate in acetic anhydride (**Scheme S4**).

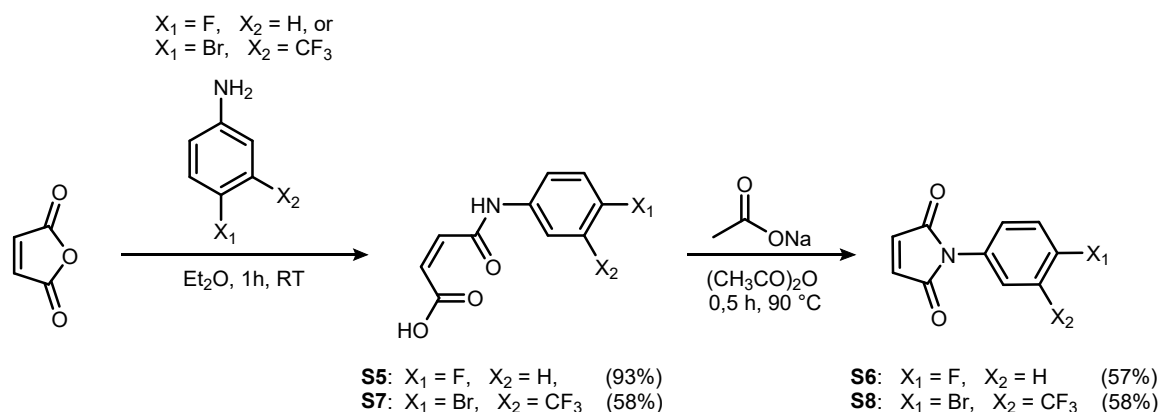

**Scheme S4.** Synthesis of Michael acceptors **S6** and **S8** used in reactions leading to benzosiloxaboroles **14–17**. Compound **S9** was synthesized in two-step protocol. The first step involved the reaction between 6-bromohexan-1-ol and pyridine as described in literature<sup>8</sup>. Resultant *N*-(6-hydroxyhex-1-yl)pyridinium bromide was then subjected to ion exchange with KOTf in order to give the final *N*-(6-hydroxyhex-1-yl)pyridinium triflate (**Scheme S5**).

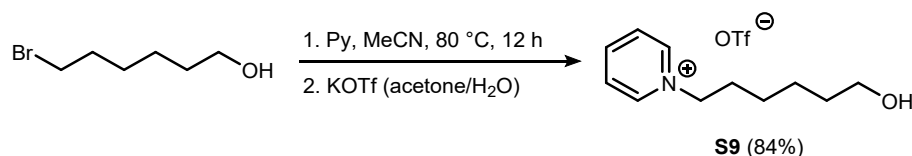

**Scheme S5.** Synthesis of compound **S9** used in reactions leading to benzosiloxaboroles **18** and **19**.

Synthesis of  $\alpha$ -bromoketones was achieved through bromination of acetone and acetophenone with bromine and NBS, respectively, in accordance with the protocols already reported<sup>9,10</sup> (**Scheme S6**).

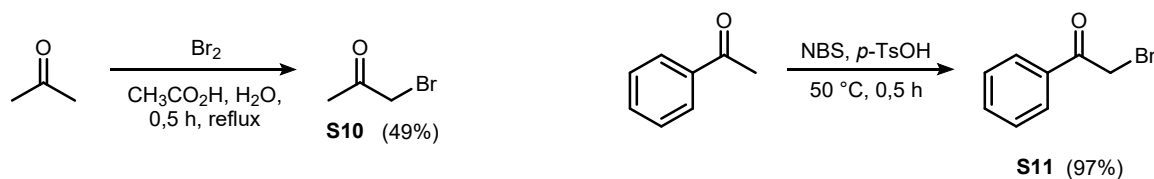

**Scheme S6.** Synthesis of  $\alpha$ -bromoketones, *i.e.*, bromoacetone (**S10**) and 2-bromoacetophenone (**S11**) used as electrophiles in reactions leading to benzosiloxaboroles **22** and **23**, respectively.

**Bis((4-bromo-2,6-difluorophenyl)thio)methane (1b\_CH2).** The compound was isolated through crystallization with hexane, as a byproduct during the synthesis of **1b** conducted in the initial variant. <sup>1</sup>H NMR (400 MHz, CDCl<sub>3</sub>)  $\delta$  7.11–7.05 (m, 4H), 4.27 (s, 2H) ppm. <sup>13</sup>C NMR (101 MHz, CDCl<sub>3</sub>)  $\delta$  164.3 – 161.4 (m), 123.8–122.5 (m), 116.5–114.9 (m), 108.6 (t,  $J = 22.4$  Hz), 38.3 (p,  $J = 3.2$  Hz) ppm. <sup>19</sup>F NMR (376 MHz, CDCl<sub>3</sub>)  $\delta$  -102.64 to -102.78 (m) ppm.

**1,2-Bis(4-bromo-2,6-difluorophenyl)disulfane (1b\_D).** The compound was isolated as a residue after distillation during the synthesis of **1b** conducted in the final variant. <sup>1</sup>H NMR (400 MHz, CDCl<sub>3</sub>)  $\delta$  7.18–7.11

(m, 4H) ppm.  $^{13}\text{C}$  NMR (101 MHz,  $\text{CDCl}_3$ )  $\delta$  165.8–160.1 (m), 125.1 (t,  $J = 12.4$  Hz), 116.0 (m), 112.4 (t,  $J = 23.1$  Hz) ppm.  $^{19}\text{F}$  NMR (376 MHz,  $\text{CDCl}_3$ )  $\delta$  -102.11 (d,  $J = 5.6$  Hz) ppm.

**Succinimidyl acrylate (S1).**<sup>2</sup>  $^1\text{H}$  NMR (400 MHz,  $\text{CDCl}_3$ )  $\delta$  6.70 (dd,  $J = 17.3, 0.9$  Hz, 1H), 6.32 (dd,  $J = 17.3, 10.7$  Hz, 1H), 6.16 (dd,  $J = 10.7, 0.9$  Hz, 1H), 2.86 (s, 4H) ppm.

***N*-(Pyrimidin-2-yl)acrylamide (S2).**<sup>3</sup>  $^1\text{H}$  NMR (400 MHz,  $\text{CDCl}_3$ )  $\delta$  9.41 (s, 1H), 8.65 (d,  $J = 4.8$  Hz, 2H), 7.02 (t,  $J = 4.9$  Hz, 1H), 6.93 (dd,  $J = 17.0, 10.3$  Hz, 1H), 6.54 (dd,  $J = 17.0, 1.5$  Hz, 1H), 5.85 (dd,  $J = 10.3, 1.5$  Hz, 1H) ppm.

***N*-(Pyrazin-2-yl)acrylamide (S3).**<sup>4</sup>  $^1\text{H}$  NMR (400 MHz,  $\text{DMSO}-d_6$ )  $\delta$  11.01 (s, 1H), 9.43 (d,  $J = 1.6$  Hz, 1H), 8.42 (dd,  $J = 2.6, 1.5$  Hz, 1H), 8.38 (d,  $J = 2.5$  Hz, 1H), 6.62 (dd,  $J = 17.1, 10.1$  Hz, 1H), 6.36 (dd,  $J = 17.0, 1.8$  Hz, 1H), 5.85 (dd,  $J = 10.1, 1.8$  Hz, 1H) ppm.

***N*-(5-Methylisoxazol-3-yl)acrylamide (S4).**<sup>5</sup>  $^1\text{H}$  NMR (400 MHz,  $\text{DMSO}-d_6$ )  $\delta$  11.11 (s, 1H), 6.70 (s, 1H), 6.45 (dd,  $J = 17.0, 10.1$  Hz, 1H), 6.31 (dd,  $J = 17.1, 2.0$  Hz, 1H), 5.82 (dd,  $J = 10.1, 2.0$  Hz, 1H), 2.38 (d,  $J = 0.9$  Hz, 3H) ppm.

**4-((4-Fluorophenyl)amino)-4-oxobut-2-enoic acid (S5).** The synthesis was performed according to the previously described protocol<sup>6,7</sup> using 4-fluoroaniline. The product was obtained as a yellow solid. Yield 3.91 g (93%)  $^1\text{H}$  NMR (400 MHz,  $\text{DMSO}-d_6$ )  $\delta$  13.05 (s, 1H), 10.41 (s, 1H), 7.67–7.56 (m, 2H), 7.22–7.08 (m, 3H), 6.44 (d,  $J = 12.0$  Hz, 1H), 6.28 (d,  $J = 12.0$  Hz, 1H) ppm.  $^{13}\text{C}$  NMR (101 MHz,  $\text{DMSO}-d_6$ )  $\delta$  167.3, 163.6, 158.8 (d,  $J = 240.7$  Hz), 135.4 (d,  $J = 2.6$  Hz), 132.2, 130.7, 121.7 (d,  $J = 7.9$  Hz), 115.9 (d,  $J = 22.3$  Hz) ppm.  $^{19}\text{F}$  NMR (376 MHz,  $\text{DMSO}-d_6$ )  $\delta$  -118.52 (tt,  $J = 8.9, 4.9$  Hz) ppm.

**1-(4-Fluorophenyl)-1H-pyrrole-2,5-dione (S6).** The synthesis was performed according to the previously described protocol<sup>6,7</sup>. The product was obtained as a yellow solid. Yield 2.06 g (57%)  $^1\text{H}$  NMR (400 MHz,  $\text{CDCl}_3$ )  $\delta$  7.37–7.28 (m, 2H), 7.21–7.09 (m, 2H), 6.85 (d,  $J = 1.8$  Hz, 2H) ppm.  $^{13}\text{C}$  NMR (101 MHz,  $\text{CDCl}_3$ )  $\delta$  169.4, 161.8 (d,  $J = 247.9$  Hz), 134.2, 127.9 (d,  $J = 8.5$  Hz), 127.1 (d,  $J = 3.1$  Hz), 116.2 (d,  $J = 22.9$  Hz).  $^{19}\text{F}$  NMR (376 MHz,  $\text{DMSO}-d_6$ )  $\delta$  -113.92 (tt,  $J = 8.8, 5.3$  Hz).

**4-((4-Bromo-3-(trifluoromethyl)phenyl)amino)-4-oxobut-2-enoic acid (S7).** The synthesis was performed according to the previously described protocol<sup>6,7</sup> using 4-bromo-3-(trifluoromethyl)aniline. The product was obtained as a cream-colored solid. Yield 3.95 g (58%)  $^1\text{H}$  NMR (400 MHz,  $\text{Acetone}-d_6$ )  $\delta$  13.17–11.80 (m, 1H), 10.24 (s, 1H), 7.74 (d,  $J = 2.5$  Hz, 1H), 7.36 (d,  $J = 8.7$  Hz, 1H), 7.30 (dd,  $J = 8.8, 2.5$  Hz, 1H), 6.01 (d,  $J = 12.0$  Hz, 1H), 5.88 (d,  $J = 12.0$  Hz, 1H) ppm.  $^{13}\text{C}$  NMR (101 MHz,  $\text{Acetone}-d_6$ )  $\delta$  166.9, 163.8, 138.7, 135.6, 131.4, 130.3, 128.6 (q,  $J = 30.6$  Hz), 124.1, 122.8 (q,  $J = 273.3$  Hz), 118.2 (q,  $J = 5.8$  Hz), 111.9 (d,  $J = 2.1$  Hz) ppm.  $^{19}\text{F}$  NMR (376 MHz,  $\text{DMSO}-d_6$ )  $\delta$  -61.78 ppm.

**1-(4-Bromo-3-(trifluoromethyl)phenyl)-1H-pyrrole-2,5-dione (S8).** The synthesis was performed according to the previously described protocol<sup>6,7</sup>. The product was obtained as a cream-colored solid. Yield 1.97 g (58%)  $^1\text{H}$  NMR (400 MHz,  $\text{CDCl}_3$ )  $\delta$  7.79 (d,  $J = 8.6$  Hz, 1H), 7.76 (d,  $J = 2.5$  Hz, 1H), 7.49–7.43 (m, 1H), 6.89 (d,  $J = 0.6$  Hz, 2H) ppm.  $^{13}\text{C}$  NMR (101 MHz,  $\text{CDCl}_3$ )  $\delta$  168.6, 135.7, 134.5, 131.0 (q,  $J = 31.9$  Hz), 129.7 (d,  $J = 1.2$  Hz), 125.8 (q,  $J = 5.5$  Hz), 125.0 (d,  $J = 5.6$  Hz), 126.6–118.0 (m), 118.8 (q,  $J = 1.9$  Hz) ppm.  $^{19}\text{F}$  NMR (376 MHz,  $\text{CDCl}_3$ )  $\delta$  -62.97 ppm.

***N*-(6-Hydroxyhex-1-yl)pyridinium triflate (S9).** A mixture of 6-bromohexan-1-ol (6.0 g, 33.0 mmol) and pyridine (5.4 mL, 66.0 mmol) in MeCN (50 mL) was stirred at 80 °C for 12 h. The solvent was removed under reduced pressure and the obtained solid was washed with Et<sub>2</sub>O and dried *in vacuo* to give *N*-(6-hydroxyhex-1-yl)pyridinium bromide<sup>8</sup> as a white solid. Yield 7.10 g (86%). The bromide salt (6.50 g, 25.0 mmol) was subjected to ion exchange using KOTf (4.70 g, 25.0 mmol) in acetone/H<sub>2</sub>O. The organic phase was separated and the solvent was removed under reduced pressure to leave the product as a colorless viscous liquid which dried under high vacuum prior to use in a subsequent acylation step. Yield 8.06 g (98%) <sup>1</sup>H NMR (400 MHz, acetone-*d*<sub>6</sub>) δ 9.24–9.18 (m, 2H), 8.73 (tt, *J* = 7.8, 1.4 Hz, 1H), 8.26 (t, *J* = 7.0 Hz, 2H), 4.86–4.82 (m, 2H), 3.79 (broad, 1H), 3.50 (t, *J* = 6.2 Hz, 2H), 2.15–2.10 (m, 2H), 1.53–1.40 (m, 6H) ppm. <sup>13</sup>C NMR (101 MHz, acetone-*d*<sub>6</sub>) δ 146.60, 145.78, 129.32, 122.13 (q, *J* = 321.5 Hz), 62.65, 61.97, 33.16, 32.05, 26.40, 25.94 ppm. <sup>19</sup>F NMR (376 MHz, acetone-*d*<sub>6</sub>) δ –78.90 ppm.

**Bromoacetone (S10).**<sup>9</sup> <sup>1</sup>H NMR (400 MHz, CDCl<sub>3</sub>) δ 3.88 (t, *J* = 0.5 Hz, 2H), 2.37 (d, *J* = 0.4 Hz, 3H) ppm.

**2-Bromoacetophenone (S11).**<sup>10</sup> <sup>1</sup>H NMR (400 MHz, CDCl<sub>3</sub>) δ 8.02–7.96 (m, 2H), 7.65–7.58 (m, 1H), 7.53–7.46 (m, 2H), 4.46 (d, *J* = 0.3 Hz, 2H) ppm.

## 2. Antimicrobial activity

**Table S1.** The antibacterial activity of tested agents against standard Gram-negative strains.

| MIC in $\mu\text{g}\cdot\text{mL}^{-1}$ [MBC in $\mu\text{g}\cdot\text{mL}^{-1}$ ] <sup>a</sup> / $\times$ -fold reduction of MIC in the presence of PA $\beta$ N <sup>b</sup> (diameter of inhibition zone in mm) |                              |                                    |                                   |                               |                                    |                                   |                                       |                                     |                                     |                                              |                                                    |
|--------------------------------------------------------------------------------------------------------------------------------------------------------------------------------------------------------------------|------------------------------|------------------------------------|-----------------------------------|-------------------------------|------------------------------------|-----------------------------------|---------------------------------------|-------------------------------------|-------------------------------------|----------------------------------------------|----------------------------------------------------|
| agent                                                                                                                                                                                                              | <i>E. coli</i><br>ATCC 25922 | <i>K. pneumoniae</i><br>ATCC 13883 | <i>P. mirabilis</i><br>ATCC 12453 | <i>E. cloacae</i><br>DSM 6234 | <i>S. marcescens</i><br>ATCC 13880 | <i>A. baumannii</i><br>ATCC 19606 | <i>P. aeruginosa</i><br>ATCC 27853    | <i>S. maltophilia</i><br>ATCC 13637 | <i>S. maltophilia</i><br>ATCC 12714 | <i>B. cepacia</i><br>ATCC 25416 <sup>c</sup> | <i>B. bronchiseptica</i><br>ATCC 4617 <sup>c</sup> |
| <b>1g</b>                                                                                                                                                                                                          | >400 (-)                     | >400 (-)                           | >400 (-)                          | >400 (-)                      | >400 (-)                           | >400 (-)                          | >400 (-)                              | >400 (-)                            | >400 (-)                            | >400 (-)                                     | >400 (-)                                           |
| <b>2e</b>                                                                                                                                                                                                          | >100 (-)                     | >100 (-)                           | >100 (-)                          | >100 (-)                      | >100 (-)                           | >100 (-)                          | >100 (-)                              | >100 (-)                            | >100 (-)                            | >100 (-)                                     | >100 (-)                                           |
| <b>3</b>                                                                                                                                                                                                           | >400 (-)                     | >400 (-)                           | >400 (-)                          | >400 (-)                      | >400 (-)                           | >400 (-)                          | >400 (-)                              | 400 (-)                             | 200 (-)                             | >400 (-)                                     | 50 (-)                                             |
| <b>4</b>                                                                                                                                                                                                           | <b>400/8</b> (15)            | <b>&gt;400/8</b> (-)               | >400 (-)                          | <b>&gt;400/8</b> (-)          | >400 (-)                           | <b>&gt;400/2</b> (-)              | >400 (-)                              | <b>&gt;400/2</b> (-)                | <b>&gt;400/2</b> (-)                | >400 (-)                                     | >400 (-)                                           |
| <b>5</b>                                                                                                                                                                                                           | >400 (-)                     | >400 (-)                           | >400 (-)                          | >400 (-)                      | >400 (-)                           | >400 (-)                          | >400 (-)                              | >400 (-)                            | >400 (-)                            | >400 (-)                                     | >400 (-)                                           |
| <b>6</b>                                                                                                                                                                                                           | <b>&gt;400/2</b> (-)         | >400 (-)                           | >400 (-)                          | >400 (-)                      | >400 (-)                           | >400 (-)                          | >400 (-)                              | <b>&gt;400/2</b> (-)                | >400 (-)                            | >400 (-)                                     | >400 (-)                                           |
| <b>7</b>                                                                                                                                                                                                           | <b>&gt;400/4</b> (-)         | >400 (-)                           | >400 (-)                          | >400 (-)                      | >400 (-)                           | >400 (-)                          | >400 (-)                              | >400 (-)                            | >400 (-)                            | >400 (-)                                     | >400 (-)                                           |
| <b>8</b>                                                                                                                                                                                                           | >400 (-)                     | >400 (-)                           | >400 (-)                          | >400 (-)                      | >400 (-)                           | >400 (-)                          | >400 (-)                              | >400 (-)                            | >400 (-)                            | >400 (-)                                     | >400 (-)                                           |
| <b>9</b>                                                                                                                                                                                                           | >400 (-)                     | >400 (-)                           | >400 (-)                          | >400 (-)                      | >400 (-)                           | >400 (-)                          | >400 (-)                              | >400 (-)                            | >400 (-)                            | >400 (-)                                     | >400 (-)                                           |
| <b>10</b>                                                                                                                                                                                                          | >400 (-)                     | >400 (-)                           | >400 (-)                          | >400 (-)                      | >400 (-)                           | >400 (-)                          | >400 (-)                              | >400 (-)                            | >400 (-)                            | >400 (-)                                     | >400 (-)                                           |
| <b>11</b>                                                                                                                                                                                                          | >400 (-)                     | >400 (-)                           | >400 (-)                          | >400 (-)                      | >400 (-)                           | >400 (-)                          | >400 (-)                              | >400 (-)                            | >400 (-)                            | >400 (-)                                     | >400 (-)                                           |
| <b>12</b>                                                                                                                                                                                                          | 50 [200] (17)                | 400/4 (17)                         | <b>&gt;400/4</b> (14)             | <b>&gt;400/8</b> (-)          | 200/2 (28)                         | 100 [200]/2 (18)                  | >400 (-)                              | 50 [100] (13)                       | 200/2 (13)                          | >400 (-)                                     | 12.5 [50] (25)                                     |
| <b>13</b>                                                                                                                                                                                                          | 25 [50] (19)                 | 200/4 (19)                         | 400/4 (18)                        | 400/4 (-)                     | 100/2 (29)                         | 50 [100] (20)                     | 200 [400] (-)                         | 25 [50] (19)                        | 50 [200] (17)                       | >400 (-)                                     | 12.5 [25] (26)                                     |
| <b>14<sup>d</sup></b>                                                                                                                                                                                              | <b>&gt;200/2</b> (-)         | >200 (-)                           | >200 (-)                          | >200 (-)                      | >200 (-)                           | >200 (-)                          | >200 (-)                              | 25 [100] (11)                       | 100 (-)                             | >200 (-)                                     | 200 (11)                                           |
| <b>15<sup>d</sup></b>                                                                                                                                                                                              | >200 (-)                     | >200 (-)                           | >200 (-)                          | >200 (-)                      | >200 (-)                           | >200 (-)                          | >200 (-)                              | >200 (-)                            | >200 (-)                            | >200 (-)                                     | >200 (-)                                           |
| <b>16<sup>d</sup></b>                                                                                                                                                                                              | >200 (-)                     | >200 (-)                           | >200 (-)                          | >200 (-)                      | >200 (-)                           | >200 (-)                          | >200 (-)                              | >200 (-)                            | >200 (-)                            | >200 (-)                                     | 200 (-)                                            |
| <b>17</b>                                                                                                                                                                                                          | >200 (-)                     | >200 (-)                           | >200 (-)                          | >200 (-)                      | >200 (-)                           | >200 (-)                          | >200 (-)                              | >200 (-)                            | >200 (-)                            | >200 (-)                                     | 200 (-)                                            |
| <b>18</b>                                                                                                                                                                                                          | >400 (-)                     | >400 (-)                           | >400 (-)                          | >400 (-)                      | >400 (-)                           | >400 (-)                          | >400 (-)                              | >400 (-)                            | >400 (-)                            | >400 (-)                                     | >400 (-)                                           |
| <b>19</b>                                                                                                                                                                                                          | >400 (-)                     | >400 (-)                           | >400 (-)                          | >400 (-)                      | >400 (-)                           | >400 (-)                          | >400 (-)                              | >400 (-)                            | >400 (-)                            | >400 (-)                                     | >400 (-)                                           |
| <b>20</b>                                                                                                                                                                                                          | <b>&gt;400/32</b> (-)        | <b>&gt;400/4</b> (-)               | >400 (-)                          | <b>&gt;400/4</b> (-)          | >400 (-)                           | >400 (-)                          | >400 (-)                              | >400 (-)                            | >400 (-)                            | >400 (-)                                     | >400 (-)                                           |
| <b>21</b>                                                                                                                                                                                                          | <b>&gt;400/16</b> (11)       | >400 (-)                           | >400 (-)                          | >400 (-)                      | >400 (-)                           | >400 (-)                          | >400 (-)                              | >400 (-)                            | >400 (-)                            | >400 (-)                                     | >400 (-)                                           |
| <b>22</b>                                                                                                                                                                                                          | >400 (-)                     | >400 (-)                           | >400 (-)                          | >400 (-)                      | >400 (-)                           | >400 (-)                          | >400 (-)                              | >400 (-)                            | >400 (-)                            | >400 (-)                                     | >400 (-)                                           |
| <b>23</b>                                                                                                                                                                                                          | >400 (-)                     | >400 (-)                           | >400 (-)                          | >400 (-)                      | >400 (-)                           | >400 (-)                          | >400 (-)                              | >400 (-)                            | >400 (-)                            | >400 (-)                                     | >400 (-)                                           |
| <b>24</b>                                                                                                                                                                                                          | >400 (-)                     | >400 (-)                           | >400 (-)                          | >400 (-)                      | >400 (-)                           | >400 (-)                          | >400 (-)                              | >400 (-)                            | >400 (-)                            | >400 (-)                                     | >400 (-)                                           |
| <b>25<sup>f</sup></b>                                                                                                                                                                                              | >50 (-)                      | >50 (-)                            | >50 (-)                           | >50 (-)                       | >50 (-)                            | >50 (-)                           | >50 (-)                               | >50 (-)                             | >50 (-)                             | >50 (-)                                      | >50 (-)                                            |
| <b>26</b>                                                                                                                                                                                                          | >400 (-)                     | >400 (-)                           | >400 (-)                          | >400 (-)                      | >400 (-)                           | >400 (-)                          | >400 (-)                              | >400 (-)                            | >400 (-)                            | >400 (-)                                     | >400 (-)                                           |
| <b>27</b>                                                                                                                                                                                                          | >400/2 (-)                   | >400 (-)                           | >400 (-)                          | >400 (-)                      | >400 (-)                           | >400 (-)                          | >400 (-)                              | >400 (-)                            | >400 (-)                            | >400 (-)                                     | >400 (-)                                           |
| <b>28</b>                                                                                                                                                                                                          | <b>&gt;400/4</b> (-)         | >400 (-)                           | >400 (-)                          | >400 (-)                      | >400 (-)                           | >400 (-)                          | >400 (-)                              | >400 (-)                            | >400 (-)                            | >400 (-)                                     | >400 (-)                                           |
| <b>29</b>                                                                                                                                                                                                          | <b>&gt;400/2</b> (-)         | >400 (-)                           | >400 (-)                          | >400 (-)                      | >400 (-)                           | >400 (-)                          | >400 (-)                              | >400 (-)                            | >400 (-)                            | >400 (-)                                     | >400 (-)                                           |
| NF <sup>g</sup>                                                                                                                                                                                                    | 8 [8] (24)                   | 32 [32] (23)                       | 128 [ <b>&gt;128</b> ] (9)        | 32 [32] (17)                  | 128 [ <b>&gt;128</b> ] (12)        | 64 [128] (9)                      | <b>&gt;128</b> [ <b>&gt;128</b> ] (-) | 128 [ <b>&gt;128</b> ] (-)          | 128 [ <b>&gt;128</b> ] (-)          | 32 [32] (12)                                 | 64 [128] (-)                                       |

PA $\beta$ N: efflux pump inhibitor. The significant decreases (at least a 4-fold) in the MIC values of tested compounds after the addition of PA $\beta$ N are shown in boldface. The test was performed in the MHB medium supplemented with 1 mM MgSO<sub>4</sub>.

(-): The inhibition zone was not observed in the disc-diffusion method. The diameter of the paper discs was 9 mm.

<sup>a</sup> Only the MBC values  $\leq 400 \mu\text{g}\cdot\text{mL}^{-1}$  are presented.

<sup>b</sup> In the table, only at least 2-fold decreases in the MIC values of tested compounds after the addition of PA $\beta$ N are presented.

<sup>c</sup> The growth of *B. cepacia* ATCC 25416 and *B. bronchiseptica* ATCC 4617 strains was inhibited in the MHB medium supplemented with 1 mM MgSO<sub>4</sub> and 20  $\mu\text{g}\cdot\text{mL}^{-1}$  PA $\beta$ N.

<sup>d</sup> The MIC and MBC values of the substance were determined up to 200  $\mu\text{g}\cdot\text{mL}^{-1}$ . In the table, only the MBC values  $\leq 200 \mu\text{g}\cdot\text{mL}^{-1}$  are presented. The tested substance dissolved in DMSO precipitated after implementation into the MHB medium at a concentration above 200  $\mu\text{g}\cdot\text{mL}^{-1}$ .

<sup>e</sup> The MIC and MBC values of the substance were determined up to 100  $\mu\text{g}\cdot\text{mL}^{-1}$ . In the table, only the MBC values  $\leq 100 \mu\text{g}\cdot\text{mL}^{-1}$  are presented. The tested substance dissolved in DMSO precipitated after implementation into the MHB medium at a concentration above 100  $\mu\text{g}\cdot\text{mL}^{-1}$ .

<sup>f</sup> The MIC and MBC values of the substance were determined up to 50  $\mu\text{g}\cdot\text{mL}^{-1}$ . In the table, only the MBC values  $\leq 50 \mu\text{g}\cdot\text{mL}^{-1}$  are presented. The tested substance dissolved in DMSO precipitated after implementation into the MHB medium at a concentration above 50  $\mu\text{g}\cdot\text{mL}^{-1}$ .

<sup>g</sup> NF, nitrofurantoin was used as a reference agent active against Gram-negative bacteria. The diameter of a commercial disc containing 0.3 mg of nitrofurantoin was 6 mm; the MIC of nitrofurantoin was determined according to the CLSI recommendations.<sup>11</sup>

**Table S2.** The antifungal activity of tested agents against yeasts strains.

| agent           | MIC in $\mu\text{g}\cdot\text{mL}^{-1}$ [MFC in $\mu\text{g}\cdot\text{mL}^{-1}$ ] <sup>a</sup> (Diameter of inhibition zone in mm) |                               |                                      |                                  |                                 |                                     |                                   |
|-----------------|-------------------------------------------------------------------------------------------------------------------------------------|-------------------------------|--------------------------------------|----------------------------------|---------------------------------|-------------------------------------|-----------------------------------|
|                 | <i>C. albicans</i><br>ATCC 90028                                                                                                    | <i>C. krusei</i><br>ATCC 6258 | <i>C. parapsilosis</i><br>ATCC 22019 | <i>C. tropicalis</i><br>ATCC 750 | <i>C. tropicalis</i><br>IBA 171 | <i>C. guilliermondii</i><br>IBA 155 | <i>S. cerevisiae</i><br>ATCC 9763 |
| 1e              | 100 (15)                                                                                                                            | 400 (13)                      | 400 (-)                              | 400 (-)                          | 200 (-)                         | >400 (-)                            | 200 (17)                          |
| 2e <sup>c</sup> | >100 (-)                                                                                                                            | >100 (-)                      | >100 (-)                             | >100 (-)                         | >100 (-)                        | >100 (-)                            | >100 (-)                          |
| 3               | >400 (-)                                                                                                                            | 200 (-)                       | 100 (-)                              | >400 (-)                         | 400 (-)                         | 200 (-)                             | 400 (-)                           |
| 4               | >400 (12)                                                                                                                           | 200 (12)                      | 400 (-)                              | >400 (-)                         | >400 (-)                        | 400 (12)                            | <b>12.5</b> [400] (32)            |
| 5               | >400 (-)                                                                                                                            | >400 (-)                      | >400 (-)                             | >400 (-)                         | >400 (-)                        | >400 (-)                            | >400 (-)                          |
| 6               | >400 (-)                                                                                                                            | >400 (-)                      | >400 (-)                             | >400 (-)                         | >400 (-)                        | >400 (-)                            | >400 (-)                          |
| 7               | >400 (-)                                                                                                                            | >400 (-)                      | >400 (-)                             | >400 (-)                         | >400 (-)                        | >400 (-)                            | >400 (-)                          |
| 8               | >400 (-)                                                                                                                            | >400 (-)                      | >400 (-)                             | >400 (-)                         | >400 (-)                        | >400 (-)                            | >400 (-)                          |
| 9               | >400 (-)                                                                                                                            | >400 (-)                      | >400 (-)                             | >400 (-)                         | >400 (-)                        | >400 (-)                            | >400 (-)                          |
| 10              | >400 (-)                                                                                                                            | >400 (-)                      | >400 (-)                             | >400 (-)                         | >400 (-)                        | >400 (-)                            | >400 (-)                          |
| 11              | >400 (-)                                                                                                                            | >400 (-)                      | >400 (-)                             | >400 (-)                         | >400 (-)                        | >400 (-)                            | >400 (-)                          |
| 12              | >400 (-)                                                                                                                            | >400 (-)                      | >400 (-)                             | >400 (-)                         | >400 (-)                        | >400 (-)                            | >400 (-)                          |
| 13              | >400 (-)                                                                                                                            | >400 (-)                      | >400 (-)                             | >400 (-)                         | >400 (-)                        | >400 (-)                            | >400 (-)                          |
| 14 <sup>b</sup> | 200 (21)                                                                                                                            | <b>12.5</b> [100] (30)        | 100 (27)                             | 200 (20)                         | 200 (19)                        | 100 (31)                            | 50 (30)                           |
| 15 <sup>b</sup> | 200 (19)                                                                                                                            | 25 (29)                       | 200 (23)                             | >200 (14)                        | >200 (15)                       | 200 (28)                            | 200 (26)                          |
| 16 <sup>b</sup> | 50 (25)                                                                                                                             | 25 (21)                       | 50 (24)                              | 50 (19)                          | 50 (19)                         | <b>12.5</b> [50] (30)               | <b>6.25</b> [50] (35)             |
| 17              | 100 (20)                                                                                                                            | 100 (18)                      | 50 (22)                              | 100 (14)                         | 200 (16)                        | 50 [200] (27)                       | <b>6.25</b> [100] (33)            |
| 18              | >400 (-)                                                                                                                            | >400 (-)                      | 400 (14)                             | 400 (-)                          | 400 (-)                         | >400 (-)                            | >400 (-)                          |
| 19              | >400 (-)                                                                                                                            | >400 (-)                      | 400 (16)                             | 400 (15)                         | 400 (16)                        | >400 (-)                            | >400 (-)                          |
| 20              | >400 (-)                                                                                                                            | >400 (-)                      | >400 (-)                             | >400 (-)                         | >400 (-)                        | >400 (-)                            | 400 (16)                          |
| 21              | 400 (-)                                                                                                                             | >400 (-)                      | 400 (-)                              | >400 (-)                         | 400 (-)                         | >400 (-)                            | <b>6.25</b> [100] (30)            |
| 22              | >400 (-)                                                                                                                            | 200 (12)                      | >400 (-)                             | >400 (-)                         | >400 (-)                        | >400 (-)                            | 400 (17)                          |
| 23              | >400 (-)                                                                                                                            | 200 (12)                      | 400 (-)                              | 400 (-)                          | 400 (-)                         | >400 (-)                            | 25 [200] (24)                     |
| 24              | >400 (-)                                                                                                                            | >400 (-)                      | >400 (-)                             | >400 (-)                         | >400 (-)                        | >400 (-)                            | >400 (-)                          |
| 25 <sup>d</sup> | 50 (-)                                                                                                                              | >50 (-)                       | >50 (-)                              | >50 (-)                          | 50 (-)                          | 50 (-)                              | 25 (-)                            |
| 26              | >400 (-)                                                                                                                            | >400 (-)                      | >400 (-)                             | >400 (-)                         | >400 (-)                        | >400 (-)                            | >400 (-)                          |
| 26              | >400 (-)                                                                                                                            | >400 (-)                      | >400 (-)                             | >400 (-)                         | >400 (-)                        | >400 (-)                            | >400 (-)                          |
| 27              | >400 (-)                                                                                                                            | >400 (-)                      | >400 (-)                             | >400 (-)                         | >400 (-)                        | >400 (-)                            | >400 (-)                          |
| 28              | >400 (-)                                                                                                                            | >400 (-)                      | >400 (-)                             | >400 (-)                         | >400 (-)                        | >400 (-)                            | >400 (-)                          |
| FL <sup>f</sup> | 1 (43)                                                                                                                              | 64 <sup>f</sup> (16)          | 2 (32)                               | 0.38 (40)                        | 0.38 (39)                       | 0.75 (40)                           | 16 <sup>g</sup> (12)              |

The highest activity against yeasts indicated by the low MIC values ( $\leq 12.5 \mu\text{g}\cdot\text{mL}^{-1}$ ) is shown in boldface.

(-): The inhibition zone was not observed in the disc-diffusion method. The diameter of the paper discs was 9 mm.

<sup>a</sup> Only the MFC values  $\leq 400 \mu\text{g}\cdot\text{mL}^{-1}$  are presented.

<sup>b</sup> The MIC and MFC values of the substance were determined up to  $200 \mu\text{g}\cdot\text{mL}^{-1}$ . In the table, only the MFC values  $\leq 200 \mu\text{g}\cdot\text{mL}^{-1}$  are presented. The tested substance dissolved in DMSO precipitated after implementation into the RPMI medium at a concentration above  $200 \mu\text{g}\cdot\text{mL}^{-1}$ .

<sup>c</sup> The MIC and MFC values of the substance were determined up to  $100 \mu\text{g}\cdot\text{mL}^{-1}$ . In the table, only the MFC values  $\leq 100 \mu\text{g}\cdot\text{mL}^{-1}$  are presented. The tested substance dissolved in DMSO precipitated after implementation into the RPMI medium at a concentration above  $100 \mu\text{g}\cdot\text{mL}^{-1}$ .

<sup>d</sup> The MIC and MFC values of the substance were determined up to  $50 \mu\text{g}\cdot\text{mL}^{-1}$ . In the table, only the MFC values  $\leq 50 \mu\text{g}\cdot\text{mL}^{-1}$  are presented. The tested substance dissolved in DMSO precipitated after implementation into the RPMI medium at a concentration above  $50 \mu\text{g}\cdot\text{mL}^{-1}$ .

<sup>e</sup> FL, fluconazole was used as a reference antifungal agent; the diameter of a commercial disc containing 0.025 mg of fluconazole was 6 mm; the MIC value of fluconazole was determined by the Etest method.<sup>12</sup>

<sup>f</sup> The ellipse was visible pointing the MIC value  $64 \mu\text{g}\cdot\text{mL}^{-1}$ . However, with macro-colonies up to a concentration  $\geq 256 \mu\text{g}\cdot\text{mL}^{-1}$ . In accordance with the recommendations for the Etest method, the MIC value of fluconazole against *C. krusei* can also be interpreted as  $\geq 256 \mu\text{g}\cdot\text{mL}^{-1}$ .<sup>12,13</sup> *C. krusei* is intrinsically resistant to fluconazole.

<sup>g</sup> The ellipse was visible pointing the MIC value  $16 \mu\text{g}\cdot\text{mL}^{-1}$ , with colonies up to concentration  $\geq 256 \mu\text{g}\cdot\text{mL}^{-1}$ . There are no recommendations for the Etest method interpretation of the MIC value of fluconazole against *S. cerevisiae*. The obtained MIC  $16 \mu\text{g}\cdot\text{mL}^{-1}$  is in line with the published results.<sup>14</sup>

### 3. Cytotoxicity

**Table S3.** The viability of human normal lung fibroblasts, MRC-5 after 48 h treatment with the tested compounds.

| compound concentration<br>[ $\mu\text{g}\cdot\text{mL}^{-1}$ ] | viability of MRC-5 [% of control $\pm$ SD] |                 |                |                |                |                |                 |                |                |                |                |                |                |                |                  |
|----------------------------------------------------------------|--------------------------------------------|-----------------|----------------|----------------|----------------|----------------|-----------------|----------------|----------------|----------------|----------------|----------------|----------------|----------------|------------------|
|                                                                | 6                                          | 12              | 14             | 15             | 16             | 17             | 20              | 22             | 23             | 24             | 25             | 27             | 28             | 29             | LIN <sup>a</sup> |
| 400                                                            | 29.5 $\pm$ 5.8                             | 0.4 $\pm$ 0.2   | 0.1 $\pm$ 0.1  | 6.7 $\pm$ 0.1  | 0.1 $\pm$ 0.0  | 0.0 $\pm$ 0.0  | 3.4 $\pm$ 0.9   | 41.4 $\pm$ 0.4 | 1.0 $\pm$ 1.3  | 60.5 $\pm$ 3.8 | 1.4 $\pm$ 0.2  | 66.2 $\pm$ 2.4 | 15.6 $\pm$ 0.1 | 60.4 $\pm$ 5.2 | 85.7 $\pm$ 0.2   |
| 200                                                            | 43.6 $\pm$ 5.1                             | 46.9 $\pm$ 2.7  | 27.3 $\pm$ 3.2 | 41.5 $\pm$ 0.7 | 0.4 $\pm$ 0.2  | 29.5 $\pm$ 0.3 | 38.8 $\pm$ 4.8  | 69.6 $\pm$ 3.7 | 32.0 $\pm$ 0.3 | 76.5 $\pm$ 3.8 | 0.9 $\pm$ 0.2  | 68.5 $\pm$ 3.4 | 32.5 $\pm$ 0.0 | 69.6 $\pm$ 2.4 | 85.7 $\pm$ 3.2   |
| 100                                                            | 90.4 $\pm$ 0.5                             | 76.4 $\pm$ 3.5  | 52.0 $\pm$ 2.8 | 65.0 $\pm$ 0.1 | 46.0 $\pm$ 1.4 | 71.2 $\pm$ 1.3 | 68.5 $\pm$ 4.9  | 78.4 $\pm$ 4.5 | 64.2 $\pm$ 3.6 | 73.0 $\pm$ 4.0 | 57.3 $\pm$ 2.9 | 74.3 $\pm$ 7.9 | 47.7 $\pm$ 3.7 | 74.1 $\pm$ 0.5 | 83.9 $\pm$ 0.5   |
| 50                                                             | 108.3 $\pm$ 3.0                            | 86.1 $\pm$ 6.9  | 80.3 $\pm$ 7.5 | 69.9 $\pm$ 1.8 | 62.7 $\pm$ 2.5 | 89.2 $\pm$ 8.5 | 84.0 $\pm$ 1.5  | 94.4 $\pm$ 2.1 | 85.9 $\pm$ 5.1 | 78.2 $\pm$ 3.0 | 70.0 $\pm$ 4.4 | 79.7 $\pm$ 7.5 | 65.5 $\pm$ 1.8 | 80.8 $\pm$ 3.4 | 85.7 $\pm$ 0.2   |
| 25                                                             | 104.7 $\pm$ 6.7                            | 94.9 $\pm$ 2.3  | 87.5 $\pm$ 3.5 | 73.7 $\pm$ 0.8 | 78.5 $\pm$ 1.6 | 87.6 $\pm$ 0.2 | 93.5 $\pm$ 2.1  | 85.2 $\pm$ 1.1 | 83.3 $\pm$ 4.4 | 81.6 $\pm$ 2.6 | 68.9 $\pm$ 8.7 | 79.3 $\pm$ 9.5 | 75.1 $\pm$ 5.4 | 86.8 $\pm$ 4.3 | 86.2 $\pm$ 2.6   |
| 12.5                                                           | 112.1 $\pm$ 1.8                            | 104.4 $\pm$ 1.9 | 88.8 $\pm$ 5.4 | 77.9 $\pm$ 4.3 | 84.8 $\pm$ 2.7 | 96.1 $\pm$ 2.3 | 95.3 $\pm$ 1.0  | 91.5 $\pm$ 2.5 | 94.3 $\pm$ 0.1 | 83.9 $\pm$ 0.1 | 79.1 $\pm$ 3.9 | 74.1 $\pm$ 1.4 | 82.6 $\pm$ 1.2 | 90.6 $\pm$ 4.5 | 86.0 $\pm$ 1.9   |
| 6.25                                                           | 104.0 $\pm$ 5.7                            | 103.0 $\pm$ 1.5 | 90.4 $\pm$ 7.6 | 89.2 $\pm$ 0.3 | 97.0 $\pm$ 0.2 | 99.9 $\pm$ 4.6 | 101.2 $\pm$ 1.7 | 92.1 $\pm$ 0.1 | 99.3 $\pm$ 8.4 | 95.5 $\pm$ 1.4 | 86.3 $\pm$ 3.2 | 74.1 $\pm$ 3.1 | 93.3 $\pm$ 1.9 | 90.1 $\pm$ 3.4 | 90.4 $\pm$ 1.1   |

<sup>a</sup>LIN, linezolid was used as a reference agent active against Gram-positive bacteria.

**Table S4.** The viability of human normal lung fibroblasts, MRC-5 after 48 h treatment with cisplatin.

| cisplatin concentration. [ $\mu\text{g}/\text{mL}$ ] | viability [%]  |
|------------------------------------------------------|----------------|
| 30.0                                                 | 6.2 $\pm$ 1.1  |
| 15.0                                                 | 15.4 $\pm$ 1.9 |
| 7.50                                                 | 34.4 $\pm$ 1.4 |
| 3.75                                                 | 31.8 $\pm$ 0.2 |
| 1.87                                                 | 30.3 $\pm$ 0.7 |
| 0.94                                                 | 62.6 $\pm$ 0.8 |
| 0.47                                                 | 86.4 $\pm$ 0.1 |



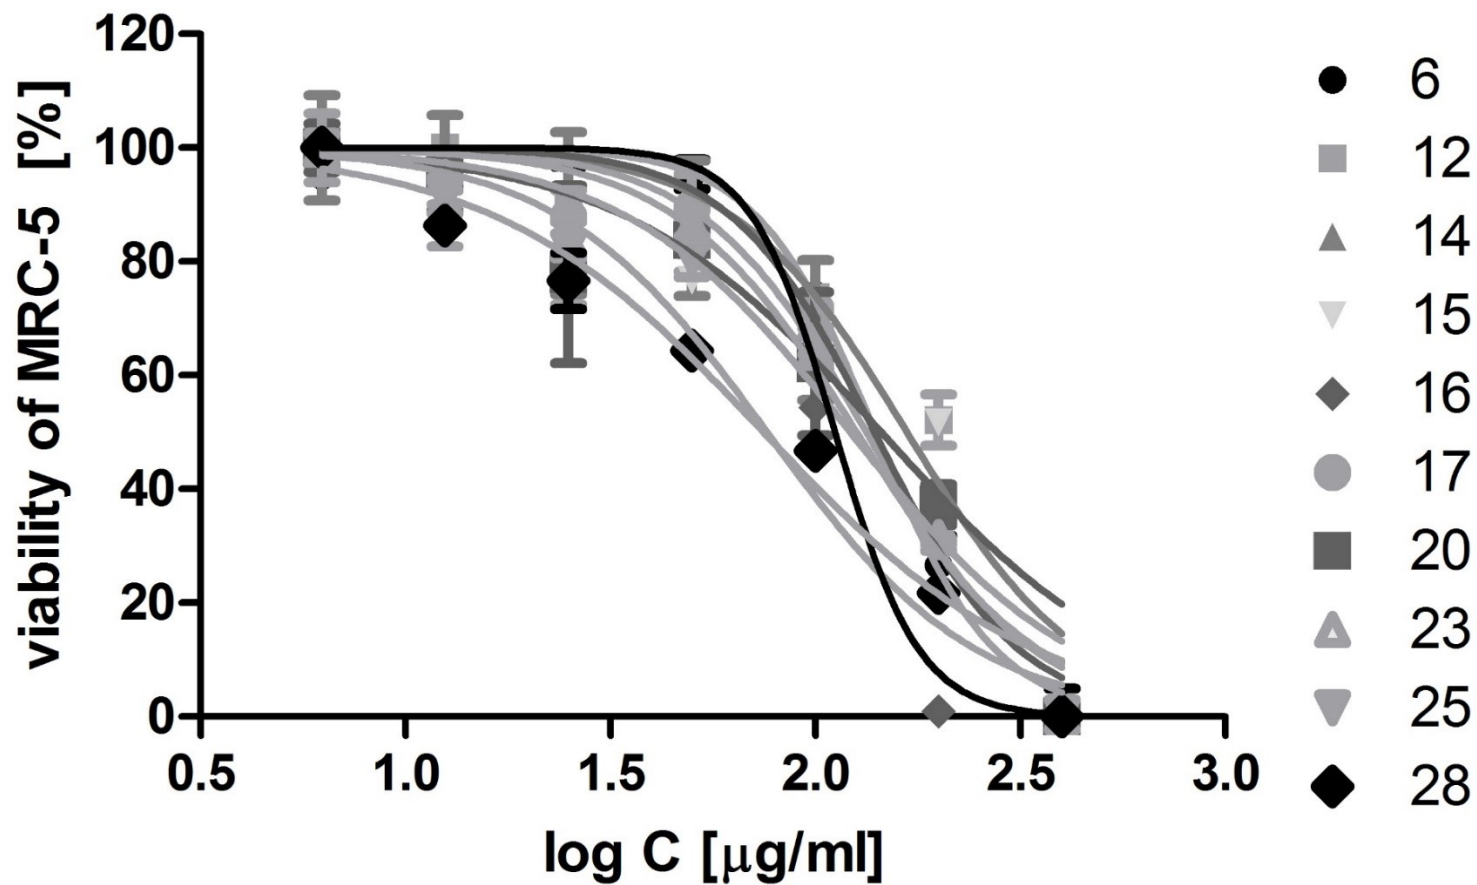

**Figure S1.** Sigmoidal dose response curves for compounds 6, 12, 14, 15, 16, 17, 20, 23, 25 and 28 determined for MRC-5 after fitting the obtained MTT data. Plots were generated using GraphPad Prism program.

#### 4. Purification of MRSA LeuRS

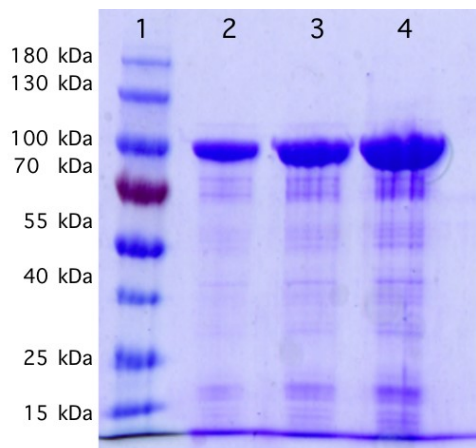

**Figure S2.** 1-Marker (PageRuler™ Prestained Protein Ladder, 10 to 180 kDa); 2-LeuRS 2.5 μg; 3-LeuRS 5.0 μg, 4- LeuRS 10.0 μg.

## 5. Single-crystal X-ray diffraction

Single crystals of all studied systems were prepared by slow solvent evaporation at room temperature from corresponding concentrated  $\text{CHCl}_3$  solutions. Obtained crystals were measured on SuperNova diffractometer equipped with Atlas detector (Cu- $K_\alpha$  radiation,  $\lambda = 1.54184 \text{ \AA}$  or Mo- $K_\alpha$  radiation,  $\lambda = 0.71073 \text{ \AA}$ ). In all the cases a selected crystal was maintained at low temperature ( $T = 100 \text{ K}$ ) with the use of Oxford Cryosystems nitrogen gas-flow device. The crystal structures were established in a conventional way *via* X-ray data refinement employing the Independent Atom Model (IAM). Data reduction and analysis were carried out with the *CrysAlisPro* suites of programs.<sup>15</sup> All structures were solved by direct methods using *SHELXS-97*<sup>16</sup> and refined using *SHELXL-2016*.<sup>17</sup> The refinement was based on  $F^2$  for all reflections except those with highly negative values of  $F^2$ . Weighted  $R$  factors ( $wR$ ) and all goodness-of-fit ( $Goof$ ) values are based on  $F^2$ . Conventional  $R$  factors are based on  $F$  with  $F$  set to zero for negative  $F^2$ . The  $F_o^2 > 2\sigma(F_o^2)$  criterion was used only for calculating  $R$  factors and is not relevant to the choice of reflections for the refinement. All non-hydrogen atoms were refined anisotropically. All carbon-bound hydrogen atoms were placed in calculated positions. The positions of O–H hydrogen atoms were derived from difference electron density maps. The O–H distances were fixed to  $0.87 \text{ \AA}$  with standard deviation of  $0.01 \text{ \AA}$ . Structure **6** was refined as 2-component twin. The methylene groups were found to be disordered over two positions related by the symmetry mirror. In contrast to other structures, structure **12** crystalizes as water solvate. Crystals **14** and **15** are isostructural. All-important crystallographic data including measurement, reduction, structure solution and refinement details are included in **Tables S5–S8** or in the associated CIF files. Deposition numbers 2190658 (for **2e**), 2190659 (for **1b\_D**), 2190660 (for **1b\_CH2**), 2190661 (for **6**), 2190662 (for **11**), 2190663 (for **12**), 2190664 (for **14**), 2190665 (for **15**), 2190666 (for **20**), 2296881 (for **22**), 2190667 (for **24**), 2258836 (for **26**), 2190668 (for **29**), 2190669 (for **27**), contain the supplementary crystallographic data for this paper.

**Table S5.** Selected crystal data, data collection and refinement parameters for **2e**, **1b\_CH2**, **1b\_D** and **6**.

|                                                                            | <b>2e</b>                                                         | <b>1b_CH2</b>                                                                | <b>1b_D</b>                                                                  | <b>6</b>                                                            |
|----------------------------------------------------------------------------|-------------------------------------------------------------------|------------------------------------------------------------------------------|------------------------------------------------------------------------------|---------------------------------------------------------------------|
| Chemical formula                                                           | C <sub>8</sub> H <sub>10</sub> BF <sub>2</sub> O <sub>2</sub> SSi | C <sub>13</sub> H <sub>6</sub> Br <sub>2</sub> F <sub>4</sub> S <sub>2</sub> | C <sub>12</sub> H <sub>4</sub> Br <sub>2</sub> F <sub>4</sub> S <sub>2</sub> | C <sub>11</sub> H <sub>12</sub> BF <sub>2</sub> NO <sub>2</sub> SSi |
| $M_r$                                                                      | 228.12                                                            | 462.10                                                                       | 448.09                                                                       | 299.18                                                              |
| Crystal system, space group                                                | Orthorhombic,<br><i>Pbca</i>                                      | Orthorhombic,<br><i>Pccn</i>                                                 | Orthorhombic,<br><i>P2<sub>1</sub>2<sub>1</sub>2<sub>1</sub></i>             | Monoclinic,<br><i>Pm</i>                                            |
| $T / \text{K}$                                                             | 100                                                               | 100                                                                          | 100                                                                          | 100                                                                 |
| $a, b, c / \text{Å}$                                                       | 11.0854 (2),<br>12.6784 (2),<br>15.9392 (3)                       | 14.4495 (2),<br>7.5081 (1),<br>13.6340 (2)                                   | 7.2662 (1),<br>10.2301 (1),<br>18.6721 (3)                                   | 8.7169 (3),<br>7.4368 (3),<br>10.3692 (3)                           |
| $\alpha, \beta, \gamma / ^\circ$                                           | 90, 90, 90                                                        | 90, 90, 90                                                                   | 90, 90, 90                                                                   | 90, 103.038 (3),<br>90                                              |
| $V / \text{Å}^3$                                                           | 2240.18 (7)                                                       | 1479.13 (4)                                                                  | 1387.97 (3)                                                                  | 654.86 (4)                                                          |
| $Z$                                                                        | 8                                                                 | 4                                                                            | 4                                                                            | 2                                                                   |
| Radiation type                                                             | Cu $K\alpha$                                                      | Cu $K\alpha$                                                                 | Cu $K\alpha$                                                                 | Cu $K\alpha$                                                        |
| $\mu / \text{mm}^{-1}$                                                     | 3.50                                                              | 9.93                                                                         | 10.55                                                                        | 5.37                                                                |
| Crystal size / mm                                                          | 0.23 × 0.16 × 0.08                                                | 0.12 × 0.11 × 0.07                                                           | 0.20 × 0.11 × 0.08                                                           | 0.22 × 0.17 × 0.08                                                  |
| $T_{\text{min}}, T_{\text{max}}$                                           | 0.612, 1.000                                                      | 0.751, 1.000                                                                 | 0.692, 1.000                                                                 | 0.697, 1.000                                                        |
| No. of measured, independent and observed [ $I > 2\sigma(I)$ ] reflections | 10110, 2331, 2177                                                 | 15232, 1501, 1486                                                            | 15762, 2781, 2767                                                            | 1720, 1720, 1623                                                    |
| $R_{\text{int}}$                                                           | 0.021                                                             | 0.021                                                                        | 0.022                                                                        | 0.042                                                               |
| $(\sin \theta/\lambda)_{\text{max}} / \text{Å}^{-1}$                       | 0.631                                                             | 0.623                                                                        | 0.623                                                                        | 0.619                                                               |
| $R[F^2 > 2\sigma(F^2)], wR(F^2), S$                                        | 0.030, 0.091,<br>1.08                                             | 0.021, 0.054,<br>1.11                                                        | 0.013, 0.032,<br>1.12                                                        | 0.047, 0.120,<br>1.08                                               |
| No. of reflections                                                         | 2331                                                              | 1501                                                                         | 2781                                                                         | 1720                                                                |
| No. of parameters                                                          | 127                                                               | 96                                                                           | 181                                                                          | 234                                                                 |
| No. of restraints                                                          | 0                                                                 | 0                                                                            | 0                                                                            | 148                                                                 |
| Largest diff. peak/hole<br>/ $e \cdot \text{Å}^{-3}$                       | 0.37, -0.29                                                       | 0.65, -0.72                                                                  | 0.20, -0.38                                                                  | 1.76, -0.88                                                         |

**Table S6.** Selected crystal data, data collection and refinement parameters for **11**, **12**, **14** and **15**.

|                                                                                                                | <b>11</b>                                                                              | <b>12</b>                                                                                | <b>14</b>                                                           | <b>15</b>                                                           |
|----------------------------------------------------------------------------------------------------------------|----------------------------------------------------------------------------------------|------------------------------------------------------------------------------------------|---------------------------------------------------------------------|---------------------------------------------------------------------|
| Chemical formula                                                                                               | C <sub>15</sub> H <sub>17</sub> BF <sub>2</sub> N <sub>2</sub> O <sub>4</sub> SSi<br>i | C <sub>12</sub> H <sub>12</sub> BF <sub>2</sub> NO <sub>4</sub> SSi<br>·H <sub>2</sub> O | C <sub>18</sub> H <sub>15</sub> BF <sub>3</sub> NO <sub>4</sub> SSi | C <sub>18</sub> H <sub>16</sub> BF <sub>2</sub> NO <sub>4</sub> SSi |
| <i>M<sub>r</sub></i>                                                                                           | 398.26                                                                                 | 361.20                                                                                   | 437.27                                                              | 419.28                                                              |
| Crystal system, space group                                                                                    | Triclinic, <i>P</i> -1                                                                 | Monoclinic, <i>C2/c</i>                                                                  | Monoclinic, <i>P2<sub>1</sub>/n</i>                                 | Monoclinic, <i>P2<sub>1</sub>/n</i>                                 |
| <i>T</i> / K                                                                                                   | 100                                                                                    | 100                                                                                      | 100                                                                 | 100                                                                 |
| <i>a</i> , <i>b</i> , <i>c</i> / Å                                                                             | 8.6314 (4),<br>10.5815 (4),<br>20.2719 (10)                                            | 26.9983 (14),<br>8.3870 (1),<br>16.1371 (5)                                              | 11.9609 (2),<br>6.7922 (1),<br>25.2398 (3)                          | 11.9955 (4),<br>6.7688 (2),<br>24.8601 (7)                          |
| $\alpha$ , $\beta$ , $\gamma$ / °                                                                              | 80.173 (4),<br>80.300 (4),<br>82.873 (4)                                               | 90, 119.051 (5),<br>90                                                                   | 90, 102.880 (1),<br>90                                              | 90, 102.673 (3),<br>90                                              |
| <i>V</i> / Å <sup>3</sup>                                                                                      | 1789.57 (14)                                                                           | 3194.3 (2)                                                                               | 1998.91 (5)                                                         | 1969.34 (11)                                                        |
| <i>Z</i>                                                                                                       | 4                                                                                      | 8                                                                                        | 4                                                                   | 4                                                                   |
| Radiation type                                                                                                 | Cu <i>K</i> α                                                                          | Cu <i>K</i> α                                                                            | Cu <i>K</i> α                                                       | Cu <i>K</i> α                                                       |
| $\mu$ / mm <sup>-1</sup>                                                                                       | 2.66                                                                                   | 2.95                                                                                     | 2.50                                                                | 2.44                                                                |
| Crystal size / mm                                                                                              | 0.13 × 0.11 × 0.09                                                                     | 0.20 × 0.12 × 0.09                                                                       | 0.20 × 0.09 × 0.08                                                  | 0.12 × 0.10 × 0.03                                                  |
| <i>T</i> <sub>min</sub> , <i>T</i> <sub>max</sub>                                                              | 0.866, 1.000                                                                           | 0.712, 1.000                                                                             | 0.850, 1.000                                                        | 0.915, 1.000                                                        |
| No. of measured, independent and observed [ <i>I</i> > 2σ( <i>I</i> )] reflections                             | 11958, 6540, 5418                                                                      | 14650, 3361, 3215                                                                        | 24573, 3948, 3736                                                   | 7478, 3812, 2949                                                    |
| <i>R</i> <sub>int</sub>                                                                                        | 0.030                                                                                  | 0.021                                                                                    | 0.022                                                               | 0.032                                                               |
| (sin θ/λ) <sub>max</sub> / Å <sup>-1</sup>                                                                     | 0.608                                                                                  | 0.631                                                                                    | 0.620                                                               | 0.619                                                               |
| <i>R</i> [ <i>F</i> <sup>2</sup> > 2σ( <i>F</i> <sup>2</sup> )], <i>wR</i> ( <i>F</i> <sup>2</sup> ), <i>S</i> | 0.046, 0.124,<br>1.06                                                                  | 0.028, 0.076,<br>1.04                                                                    | 0.025, 0.071,<br>1.04                                               | 0.037, 0.095,<br>1.00                                               |
| No. of reflections                                                                                             | 6540                                                                                   | 3361                                                                                     | 3948                                                                | 3812                                                                |
| No. of parameters                                                                                              | 481                                                                                    | 224                                                                                      | 265                                                                 | 256                                                                 |
| No. of restraints                                                                                              | 4                                                                                      | 0                                                                                        | 1                                                                   | 1                                                                   |
| Largest diff. peak/hole / e·Å <sup>-3</sup>                                                                    | 0.36, -0.38                                                                            | 0.56, -0.25                                                                              | 0.33, -0.25                                                         | 0.32, -0.34                                                         |

**Table S7.** Selected crystal data, data collection and refinement parameters for **20**, **22**, **24** and **26**.

|                                                                                                                | <b>20</b>                                                                        | <b>22</b>                                           | <b>24</b>                                                           | <b>26</b>                                                          |
|----------------------------------------------------------------------------------------------------------------|----------------------------------------------------------------------------------|-----------------------------------------------------|---------------------------------------------------------------------|--------------------------------------------------------------------|
| Chemical formula                                                                                               | C <sub>16</sub> H <sub>17</sub> BF <sub>2</sub> O <sub>4</sub> S <sub>2</sub> Si | C <sub>11</sub> H <sub>14</sub> BF <sub>3</sub> SSi | C <sub>12</sub> H <sub>18</sub> BF <sub>2</sub> O <sub>3</sub> PSSi | C <sub>8</sub> H <sub>8</sub> O <sub>4</sub> BSiF <sub>2</sub> ClS |
| <i>M<sub>r</sub></i>                                                                                           | 414.31                                                                           | 284.18                                              | 382.19                                                              | 312.55                                                             |
| Crystal system, space group                                                                                    | Triclinic, <i>P</i> -1                                                           | Triclinic, <i>P</i> -1                              | Monoclinic, <i>P</i> 2 <sub>1</sub> / <i>n</i>                      | Monoclinic, <i>P</i> 2 <sub>1</sub> / <i>c</i>                     |
| <i>T</i> / K                                                                                                   | 100                                                                              | 100                                                 | 100                                                                 | 100                                                                |
| <i>a</i> , <i>b</i> , <i>c</i> / Å                                                                             | 9.4513 (4),<br>9.8968 (4),<br>12.2922 (6)                                        | 6.8604(4),<br>9.1623(4),<br>11.9467(5)              | 13.0595 (14),<br>7.3061 (7),<br>18.839 (3)                          | 12.2732(3),<br>10.0040(1),<br>11.9960(3)                           |
| $\alpha$ , $\beta$ , $\gamma$ / °                                                                              | 91.269 (4),<br>112.587 (4),<br>118.044 (4)                                       | 101.758(4),<br>103.715(4),<br>105.684(4)            | 90,<br>91.507 (16),<br>90                                           | 90,<br>119.008(3),<br>90                                           |
| <i>V</i> / Å <sup>3</sup>                                                                                      | 907.49 (8)                                                                       | 672.94(6)                                           | 1796.9 (4)                                                          | 1288.11(6)                                                         |
| <i>Z</i>                                                                                                       | 2                                                                                | 2                                                   | 4                                                                   | 4                                                                  |
| Radiation type                                                                                                 | Cu <i>K</i> α                                                                    | Cu <i>K</i> α                                       | Cu <i>K</i> α                                                       | Cu <i>K</i> α                                                      |
| $\mu$ / mm <sup>-1</sup>                                                                                       | 3.66                                                                             | 3.09                                                | 3.44                                                                | 5.328                                                              |
| Crystal size / mm                                                                                              | 0.13 × 0.12 × 0.08                                                               | 0.482 × 0.248 ×<br>0.066                            | 0.14 × 0.07 × 0.06                                                  | 0.112 × 0.092 ×<br>0.068                                           |
| <i>T<sub>min</sub></i> , <i>T<sub>max</sub></i>                                                                | 0.837, 0.982                                                                     | 0.615, 1.000                                        | 0.893, 1.000                                                        | 0.897, 1.000                                                       |
| No. of measured,<br>independent and<br>observed [ <i>I</i> > 2σ( <i>I</i> )]<br>reflections                    | 12561, 3714, 3564                                                                | 6224, 2603, 2243                                    | 10700, 3683, 3030                                                   | 13035, 2660, 2660                                                  |
| <i>R<sub>int</sub></i>                                                                                         | 0.019                                                                            | 0.044                                               | 0.049                                                               | 0.022                                                              |
| (sin θ/λ) <sub>max</sub> / Å <sup>-1</sup>                                                                     | 0.631                                                                            | 0.935                                               | 0.631                                                               | 0.631                                                              |
| <i>R</i> [ <i>F</i> <sup>2</sup> > 2σ( <i>F</i> <sup>2</sup> )], <i>wR</i> ( <i>F</i> <sup>2</sup> ), <i>S</i> | 0.027, 0.077,<br>0.99                                                            | 0.108, 0.317,<br>1.451                              | 0.048, 0.135,<br>1.02                                               | 0.0238, 0.0655,<br>1.075                                           |
| No. of reflections                                                                                             | 3714                                                                             | 2603                                                | 3683                                                                | 2660                                                               |
| No. of parameters                                                                                              | 235                                                                              | 163                                                 | 211                                                                 | 166                                                                |
| No. of restraints                                                                                              | 0                                                                                | 0                                                   | 1                                                                   | 1                                                                  |
| Largest diff. peak/hole<br>/ e·Å <sup>-3</sup>                                                                 | 0.43, -0.42                                                                      | 2.711, -0.679                                       | 0.48, -0.40                                                         | 0.37, -0.38                                                        |

**Table S8.** Selected crystal data, data collection and refinement parameters for **27** and **28**.

|                                                                                     | <b>27</b>                                                           | <b>28</b>                                                           |
|-------------------------------------------------------------------------------------|---------------------------------------------------------------------|---------------------------------------------------------------------|
| Chemical formula                                                                    | C <sub>14</sub> H <sub>13</sub> BF <sub>3</sub> NO <sub>4</sub> SSi | C <sub>12</sub> H <sub>16</sub> BF <sub>2</sub> NO <sub>5</sub> SSi |
| $M_r$                                                                               | 387.21                                                              | 363.22                                                              |
| Crystal system, space group                                                         | Triclinic, $P-1$                                                    | Monoclinic, $P2_1/c$                                                |
| $T / K$                                                                             | 100                                                                 | 100                                                                 |
| $a, b, c / \text{\AA}$                                                              | 6.5260 (5),<br>10.5500 (5),<br>13.1827 (7)                          | 10.3865 (4),<br>16.0059 (5),<br>10.0154 (4)                         |
| $\alpha, \beta, \gamma / ^\circ$                                                    | 101.774 (4),<br>90.259 (5),<br>106.776 (6)                          | 90, 113.281 (4),<br>90                                              |
| $V / \text{\AA}^3$                                                                  | 848.76 (9)                                                          | 1529.44 (11)                                                        |
| $Z$                                                                                 | 2                                                                   | 4                                                                   |
| Radiation type                                                                      | Mo $K\alpha$                                                        | Cu $K\alpha$                                                        |
| $\mu / \text{mm}^{-1}$                                                              | 0.31                                                                | 3.08                                                                |
| Crystal size / mm                                                                   | 0.14 × 0.06 × 0.02                                                  | 0.20 × 0.18 × 0.10                                                  |
| $T_{\min}, T_{\max}$                                                                | 0.900, 1.000                                                        | 0.457, 1.000                                                        |
| No. of measured,<br>independent and<br>observed [ $I > 2\sigma(I)$ ]<br>reflections | 6440, 3897, 3022                                                    | 5846, 2948, 2744                                                    |
| $R_{\text{int}}$                                                                    | 0.025                                                               | 0.022                                                               |
| $(\sin \theta/\lambda)_{\max} / \text{\AA}^{-1}$                                    | 0.684                                                               | 0.619                                                               |
| $R[F^2 > 2\sigma(F^2)], wR(F^2), S$                                                 | 0.045, 0.106,<br>1.01                                               | 0.031, 0.084,<br>1.07                                               |
| No. of reflections                                                                  | 3897                                                                | 2948                                                                |
| No. of parameters                                                                   | 234                                                                 | 208                                                                 |
| No. of restraints                                                                   | 2                                                                   | 0                                                                   |
| Largest diff. peak/hole<br>/ $e \cdot \text{\AA}^{-3}$                              | 0.47, -0.40                                                         | 0.38, -0.40                                                         |

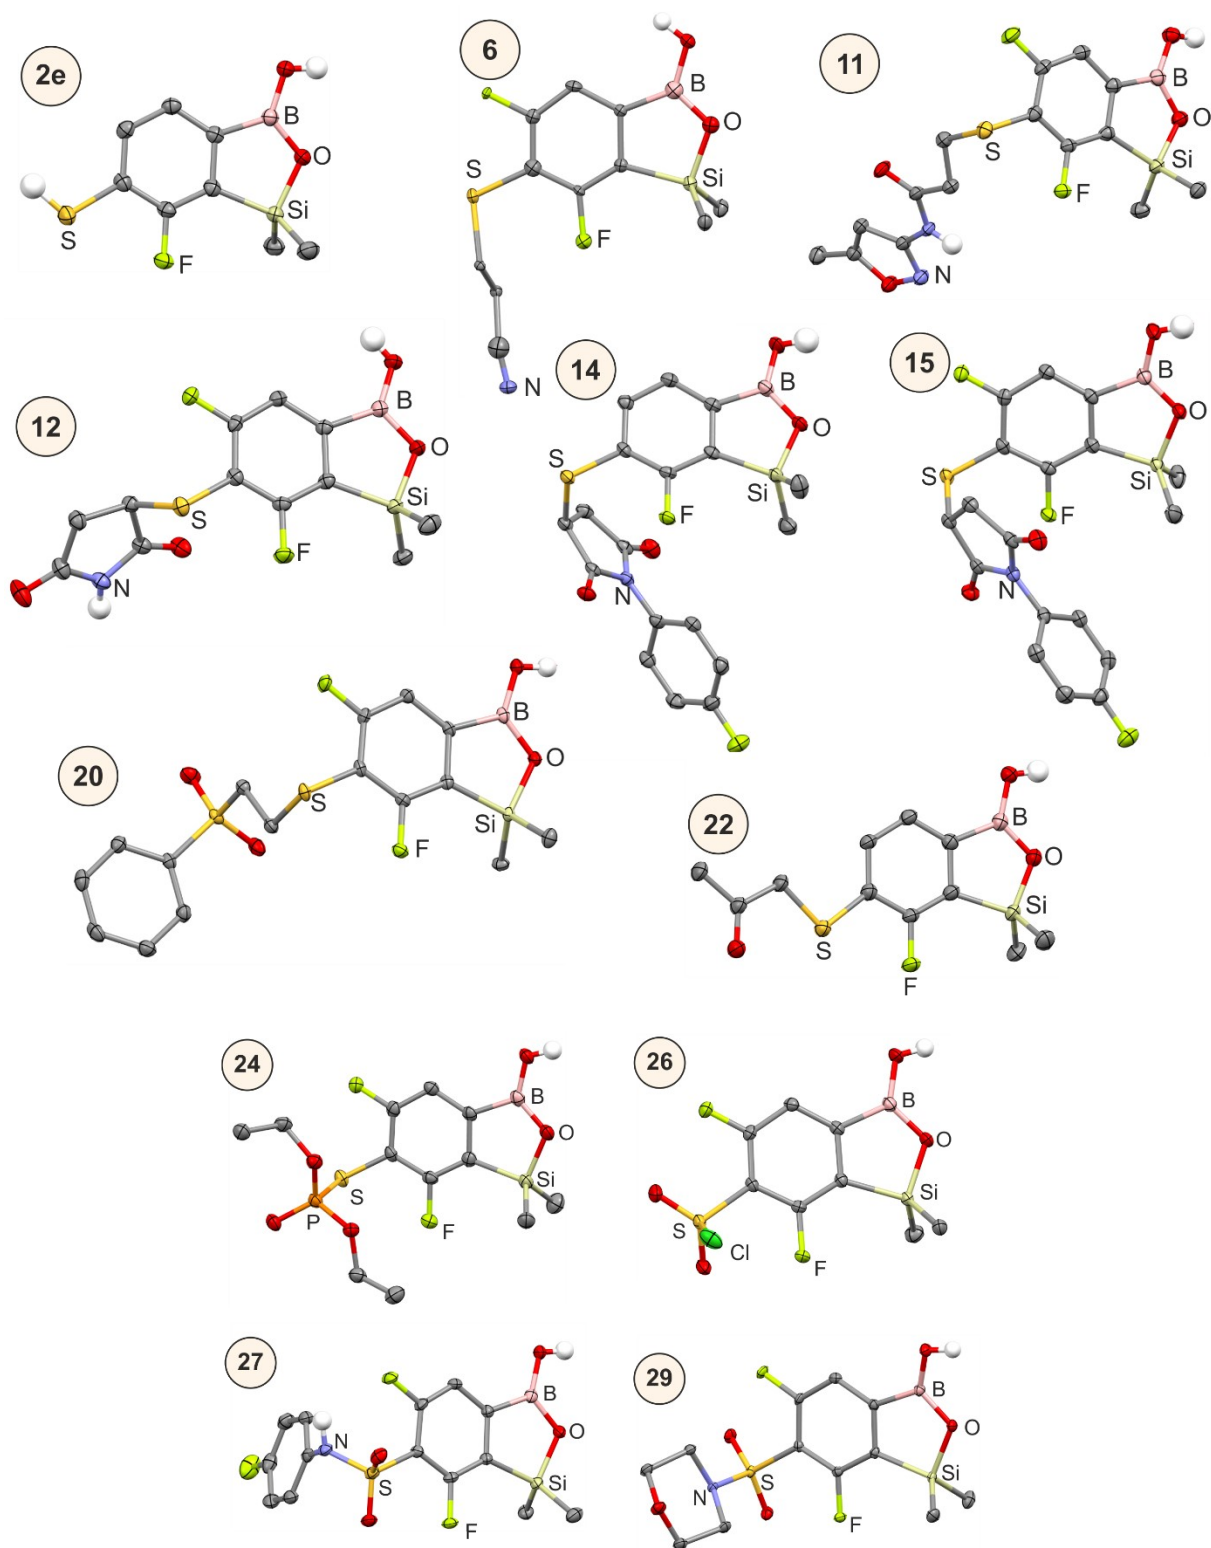

**Figure S3.** The molecular structures of **2e**, **6**, **11**, **12**, **14**, **15**, **20**, **22**, **24**, **26**, **27** and **29**. Thermal motions given as ADPs at the 50% probability level. C–H hydrogen atoms were omitted for clarity.



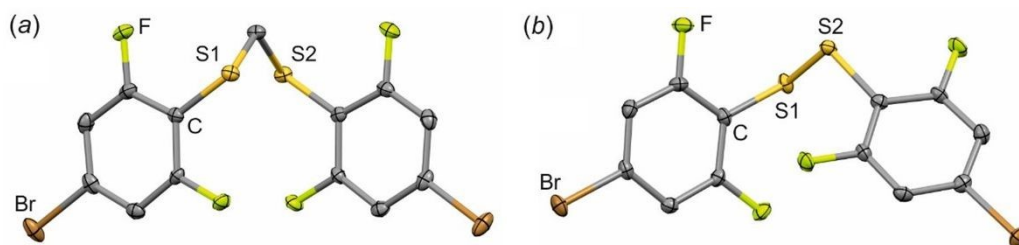

**Figure S4.** The molecular structures of **1b\_CH2** (a) and **1b\_D** (b). Thermal motions given as ADPs at the 50% probability level. C–H hydrogen atoms were omitted for clarity.

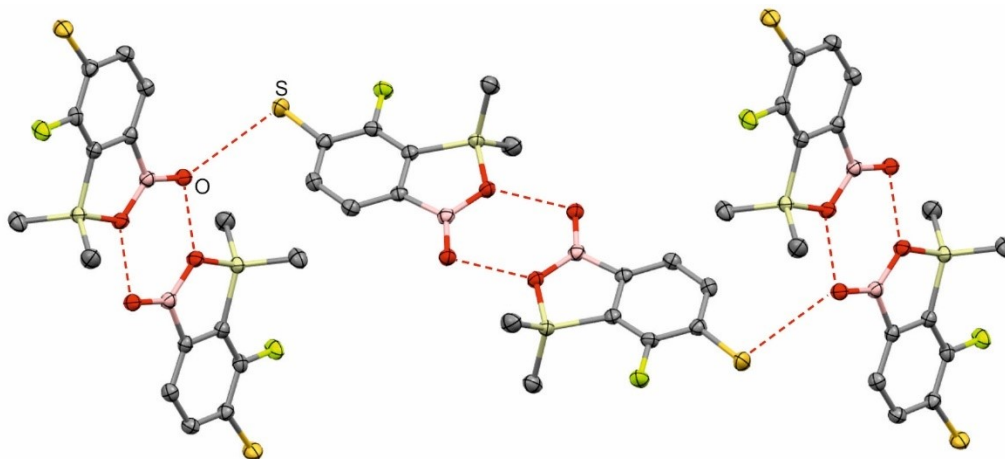

**Figure S5.** Fragment of supramolecular structures of **2e** showing the formation of molecular chains based on O–H...O and S–H...O. Hydrogen atoms are omitted for clarity.

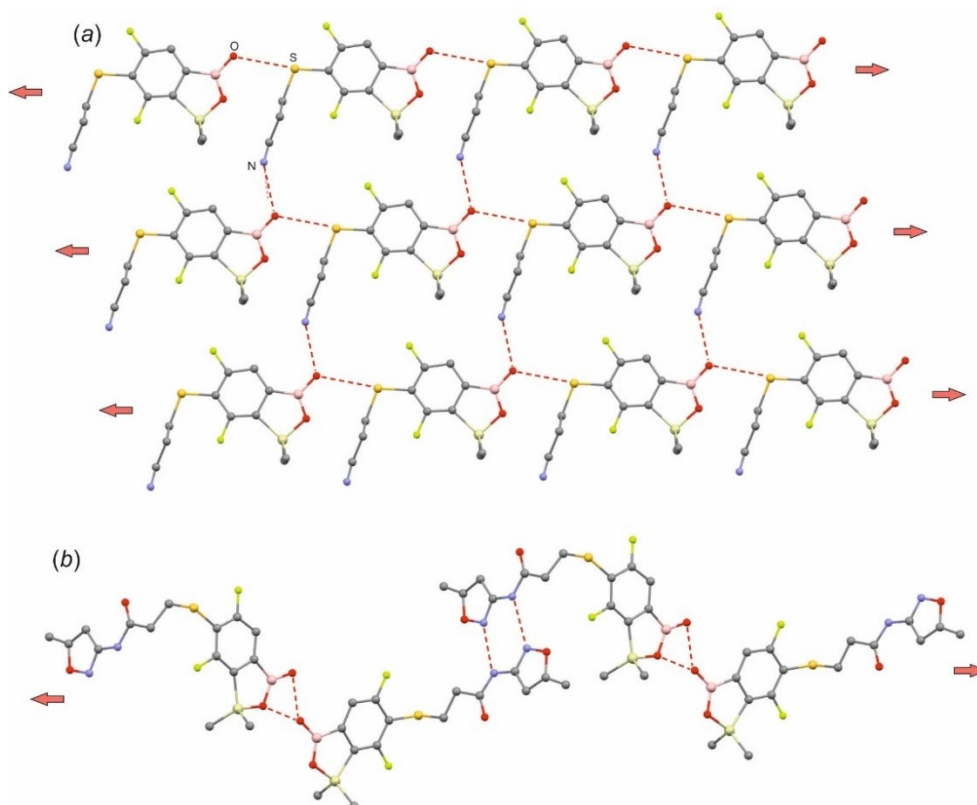

**Figure S6.** Supramolecular structures of **6** (a) and **11** (b) showing the formation of hydrogen bond network. Hydrogen atoms are omitted for clarity.

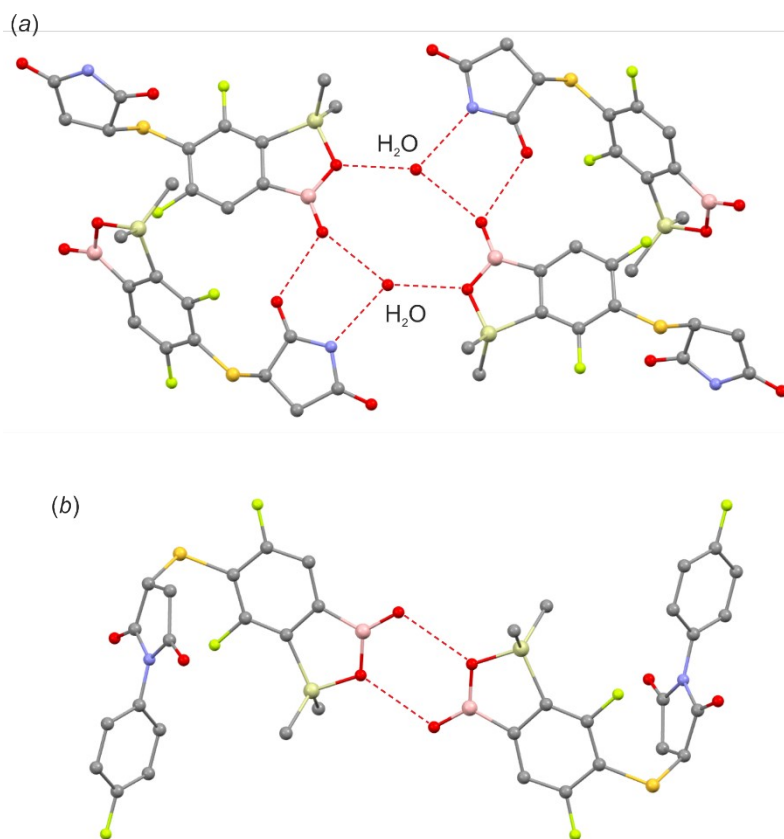

**Figure S7.** Fragments of supramolecular structures showing the formation of hydrogen bond interactions in **12** (a) and **14** (b). Hydrogen atoms are omitted for clarity.

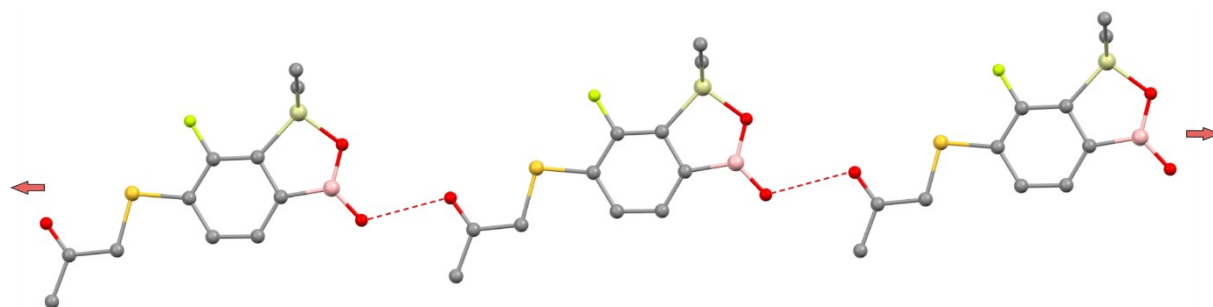

**Figure S8.** Hydrogen-bonded chains in crystal structure **22**.

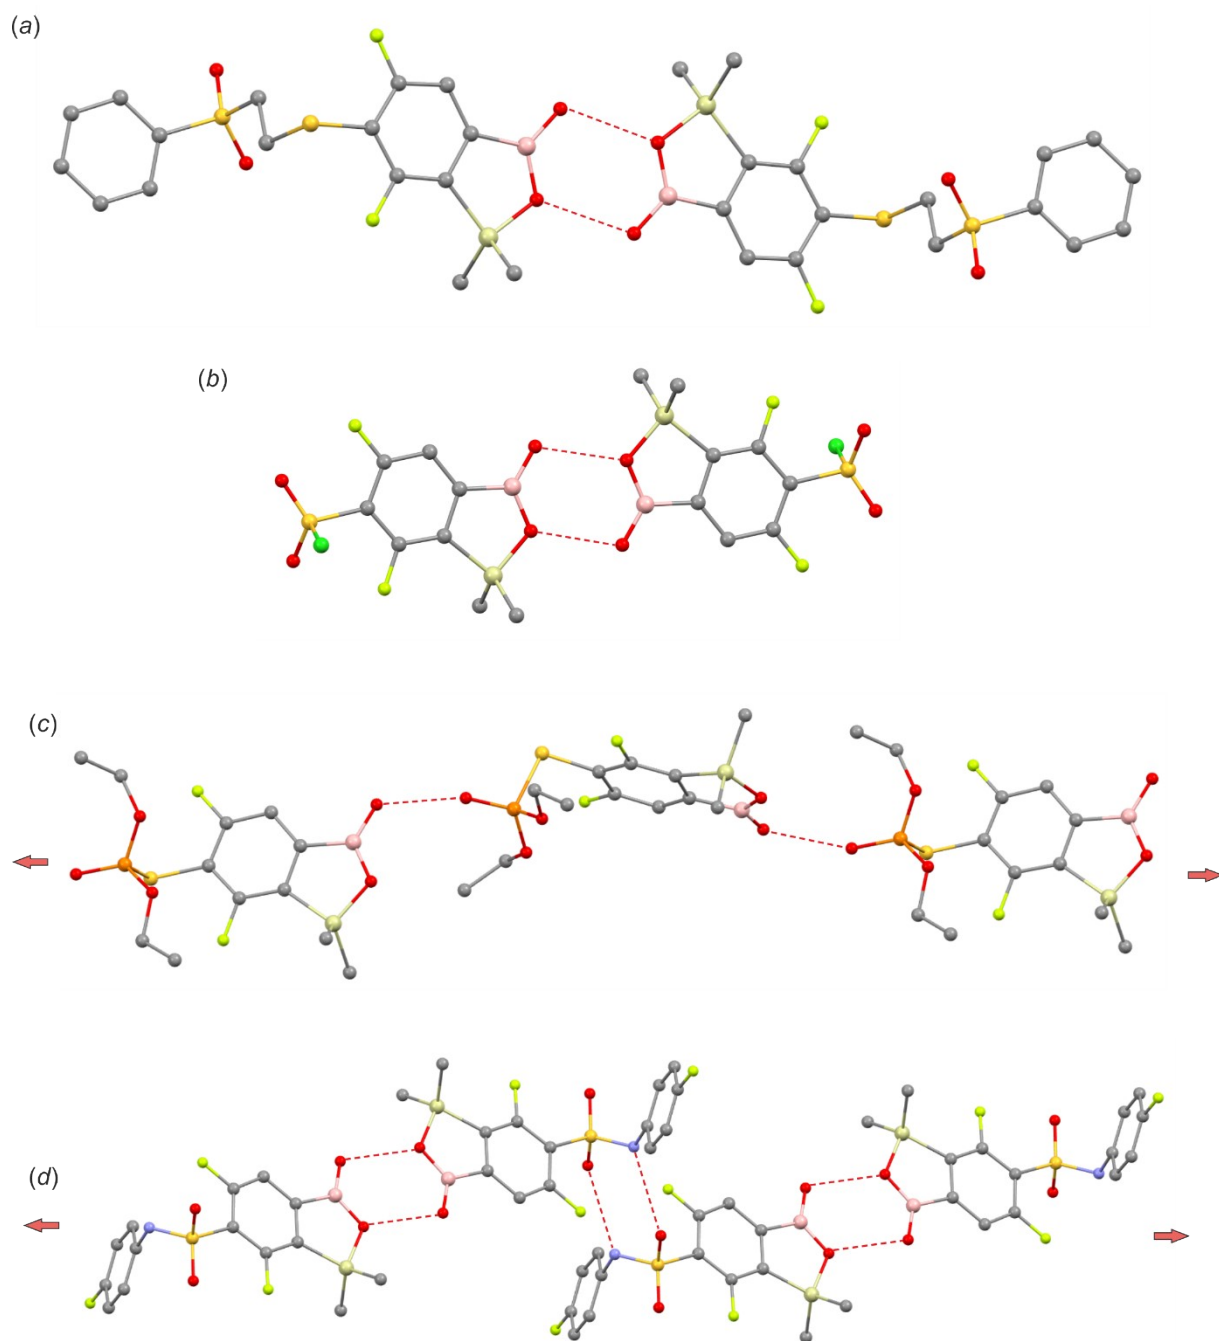

**Figure S9.** Hydrogen-bonded centrosymmetric dimers formed in crystal structure **22** (a) and **24** (b). Molecular chains observed in structures **24** (c) and **28** (d).

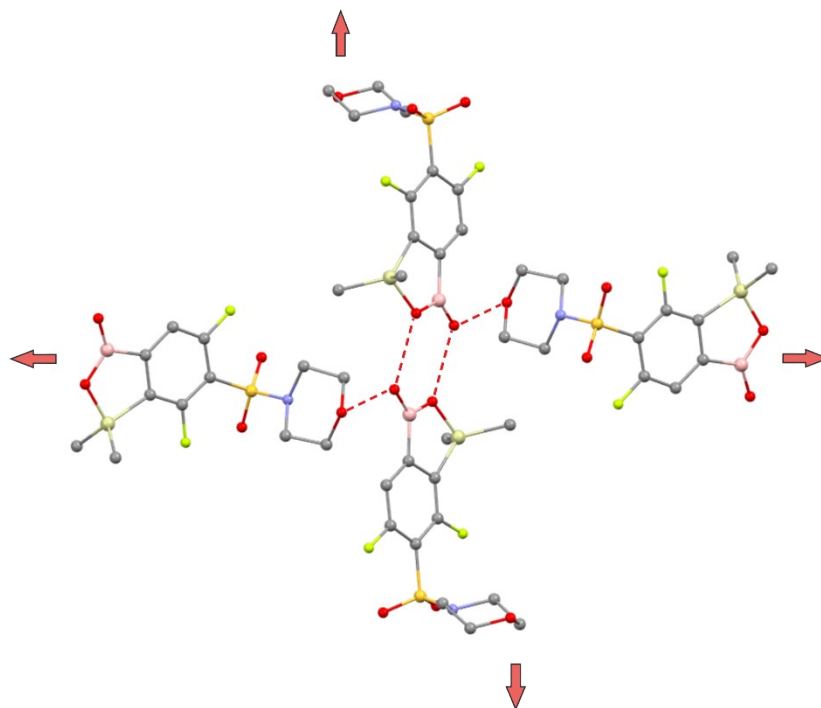

**Figure S10.** Fragment of supramolecular structures of **29** showing the formation of hydrogen bond network. Hydrogen atoms are omitted for clarity.

## 6. References

- 1 Q. Chen, G. Yu, X. Wang, Y. Huang, Y. Yan and Y. Huo, *Org. Biomol. Chem.*, 2018, **16**, 4086–4089.
- 2 T. J. Paul, A. K. Strzelczyk, M. I. Feldhof and S. Schmidt, *Biomacromolecules*, 2020, **21**, 2913–2921.
- 3 D. C. Wan, H. T. Pu and G. J. Yang, *Chin. Chem. Lett.*, 2007, **18**, 1141–1144.
- 4 K. Kokosza, J. Balzarini and D. G. Piotrowska, *Nucleosides, Nucleotides and Nucleic Acids*, 2014, **33**, 552–582.
- 5 F. A. Al-Sagheer, A. A. M. Ali, M. A. Reyad and M. Z. Elsabee, *Polym. Int.*, 1997, **44**, 88–94.
- 6 N. E. Searle (to E. I. du Pont de Nemours and Co., Inc.) U.S. pat. 2,444,536 (1948) [C.A., 42, 7340c (1948)].
- 7 M. P. Cava, A. A. Deana, K. Muth and M. J. Mitchell, in *Org. Synth.*, eds. A. S. Kende and J. P. Freeman, Wiley, 1st edn., 2003, pp. 93–93.
- 8 J. Park, Y. Choi, S. S. Lee and J. H. Jung, *Org. Lett.*, 2019, **21**, 1232–1236.
- 9 P. A. Levene, in *Org. Synth.*, eds. A. S. Kende and J. P. Freeman, Wiley, 1st edn., 2003, p. 12.
- 10 V. V. Angeles-Dunham, D. M. Nickerson, D. M. Ray and A. E. Mattson, *Angew. Chem. Int. Ed.*, 2014, **53**, 14275–14609.
- 11 Clinical and Laboratory Standards Institute. 2012. Methods for dilution antimicrobial susceptibility tests  
Clinical and Laboratory Standards Institute.
- 12 ETEST. Application guide, BioMerieux., [https://www.biomerieux-usa.com/sites/subsidiary\\_us/files/supplementary\\_inserts\\_-\\_16273\\_-\\_b\\_-\\_en\\_-\\_eag\\_-\\_etest\\_application\\_guide-3.pdf](https://www.biomerieux-usa.com/sites/subsidiary_us/files/supplementary_inserts_-_16273_-_b_-_en_-_eag_-_etest_application_guide-3.pdf), (accessed 1 December 2023).
- 13 A. Espinel-Ingroff, *Diagn. Microbiol. Infect. Dis.*, 1994, **19**, 217–220.
- 14 M. A. Pfaller, M. Bale, B. Buschelman, M. Lancaster, A. Espinel-Ingroff, J. H. Rex and M. G. Rinaldi, *J. Clin. Microbiol.*, 1994, **32**, 1650–1653.
- 15 Rigaku Oxford Diffraction, CrysAlis Pro v. 1.171.38.46, 2018.
- 16 G. M. Sheldrick, *Acta Crystallogr. A Found. Crystallogr.*, 2008, **64**, 112–122.
- 17 G. M. Sheldrick, *Acta Crystallogr. C Struct. Chem.*, 2015, **71**, 3–8.

## 7. NMR spectra

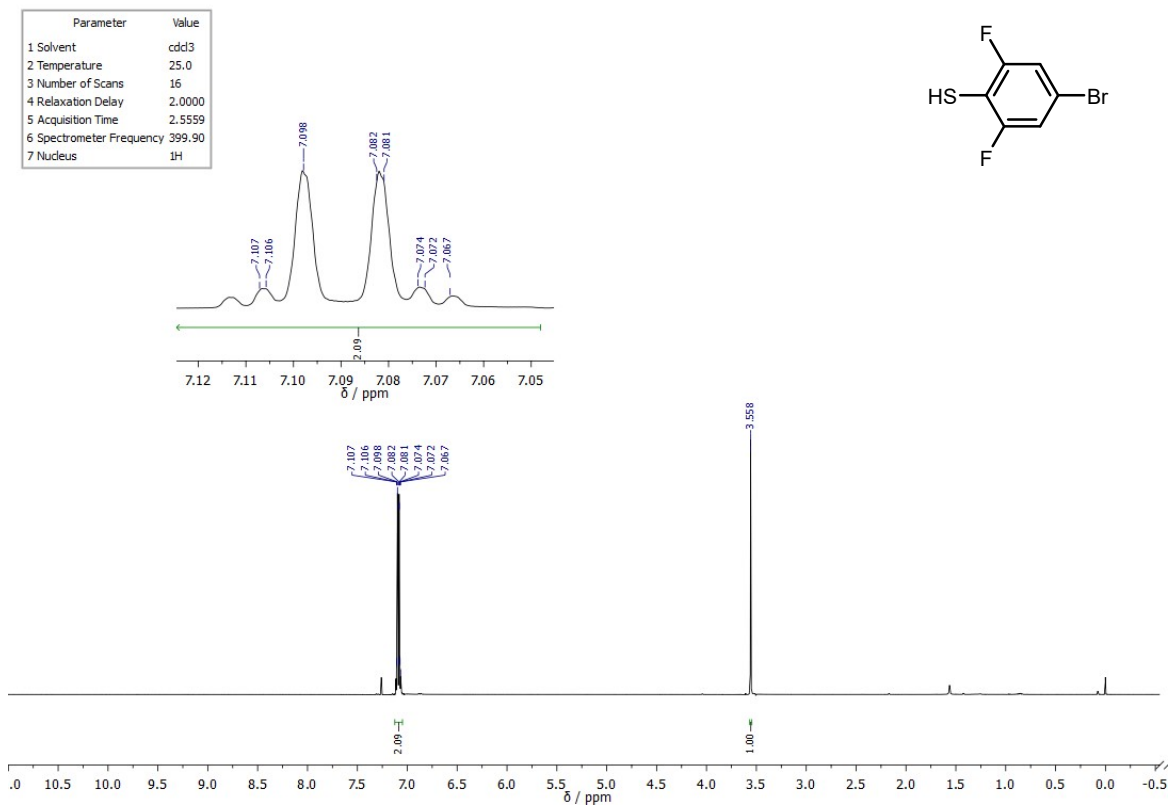

Figure S11.  $^1\text{H}$  NMR spectrum (400 MHz,  $\text{CDCl}_3$ ) of **1b**.

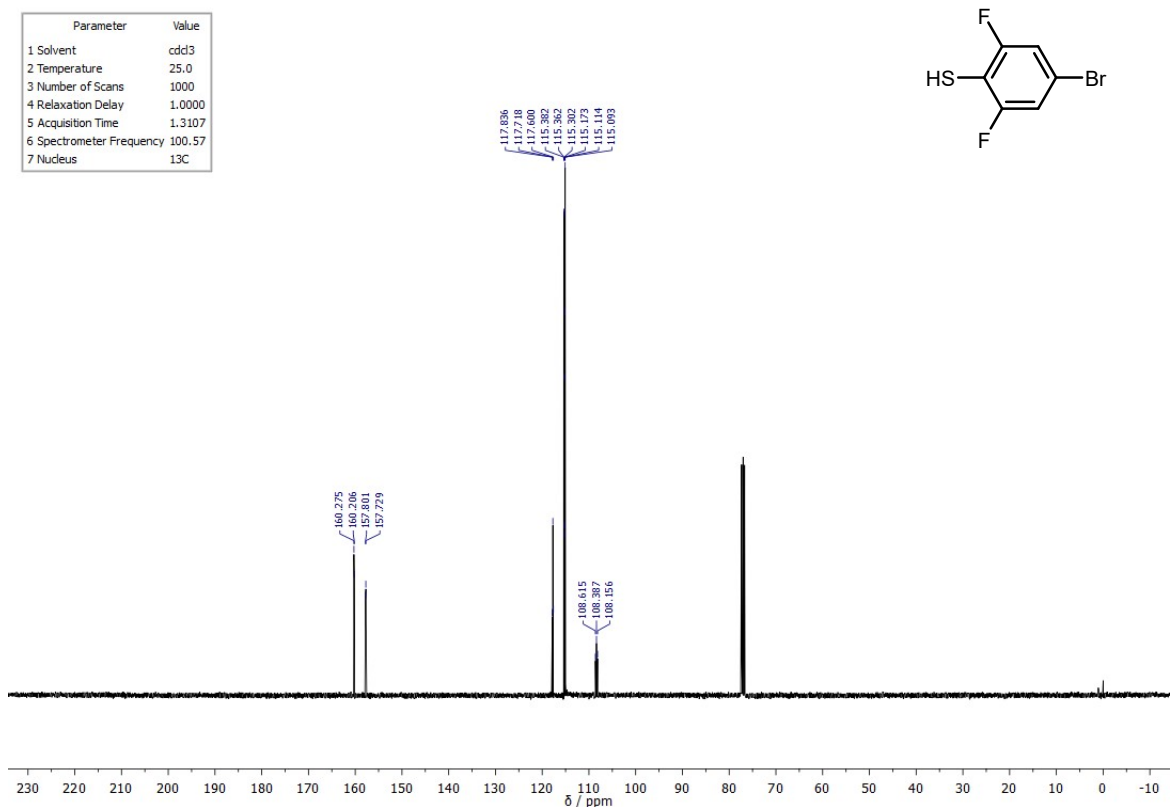

Figure S12.  $^{13}\text{C}$  NMR spectrum (101 MHz,  $\text{CDCl}_3$ ) of **1b**.

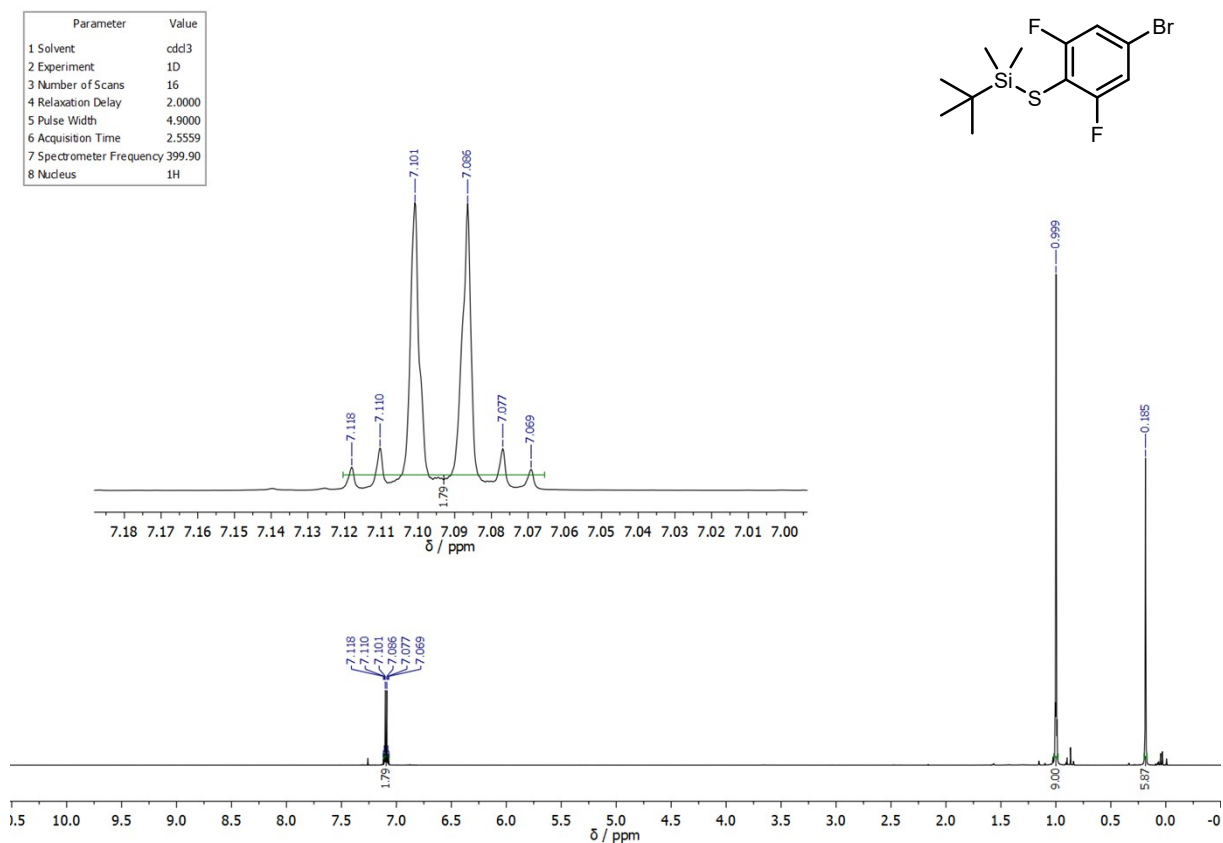

**Figure S13.**  $^1\text{H}$  NMR spectrum (400 MHz,  $\text{CDCl}_3$ ) of **1c**.

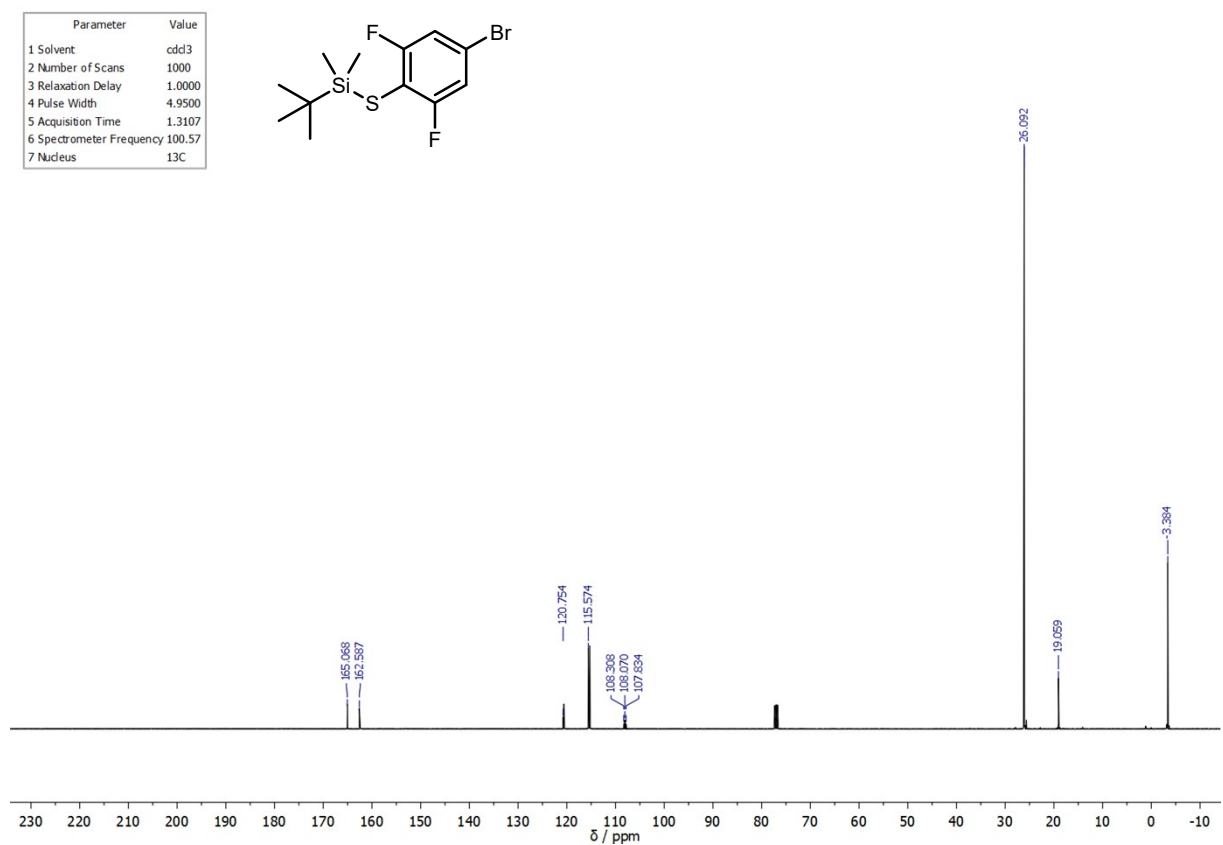

**Figure S14.**  $^{13}\text{C}$  NMR spectrum (101 MHz,  $\text{CDCl}_3$ ) of **1c**.

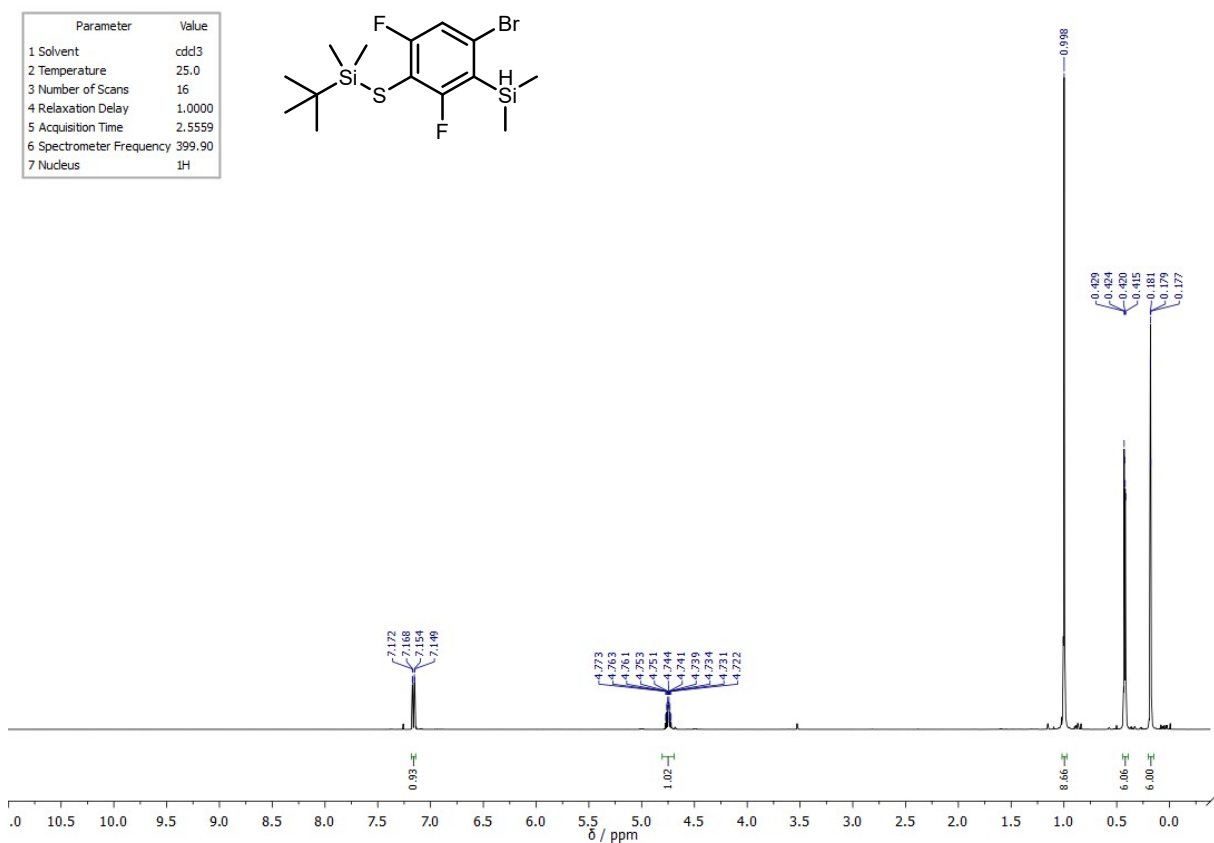

**Figure S15.** <sup>1</sup>H NMR spectrum (400 MHz, CDCl<sub>3</sub>) of **1d**.

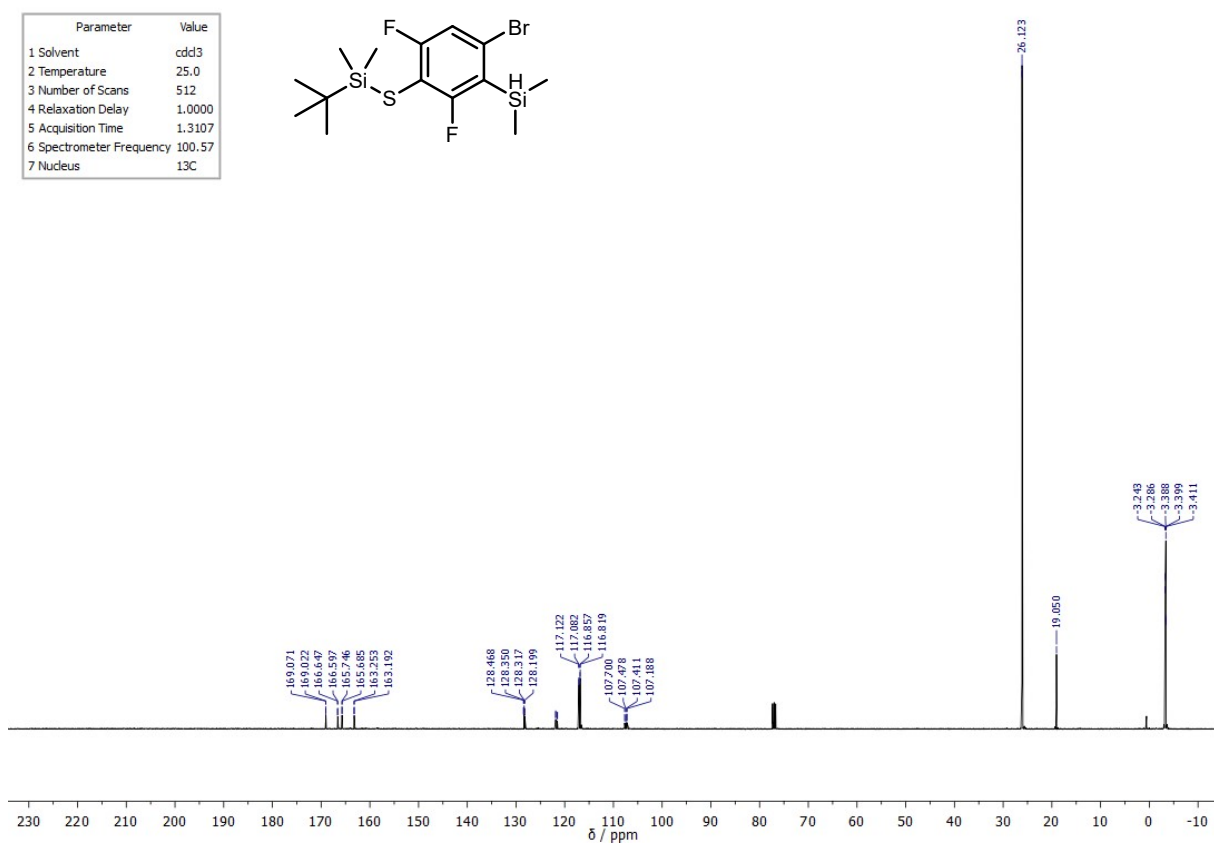

**Figure S16.** <sup>13</sup>C NMR spectrum (101 MHz, CDCl<sub>3</sub>) of **1d**.



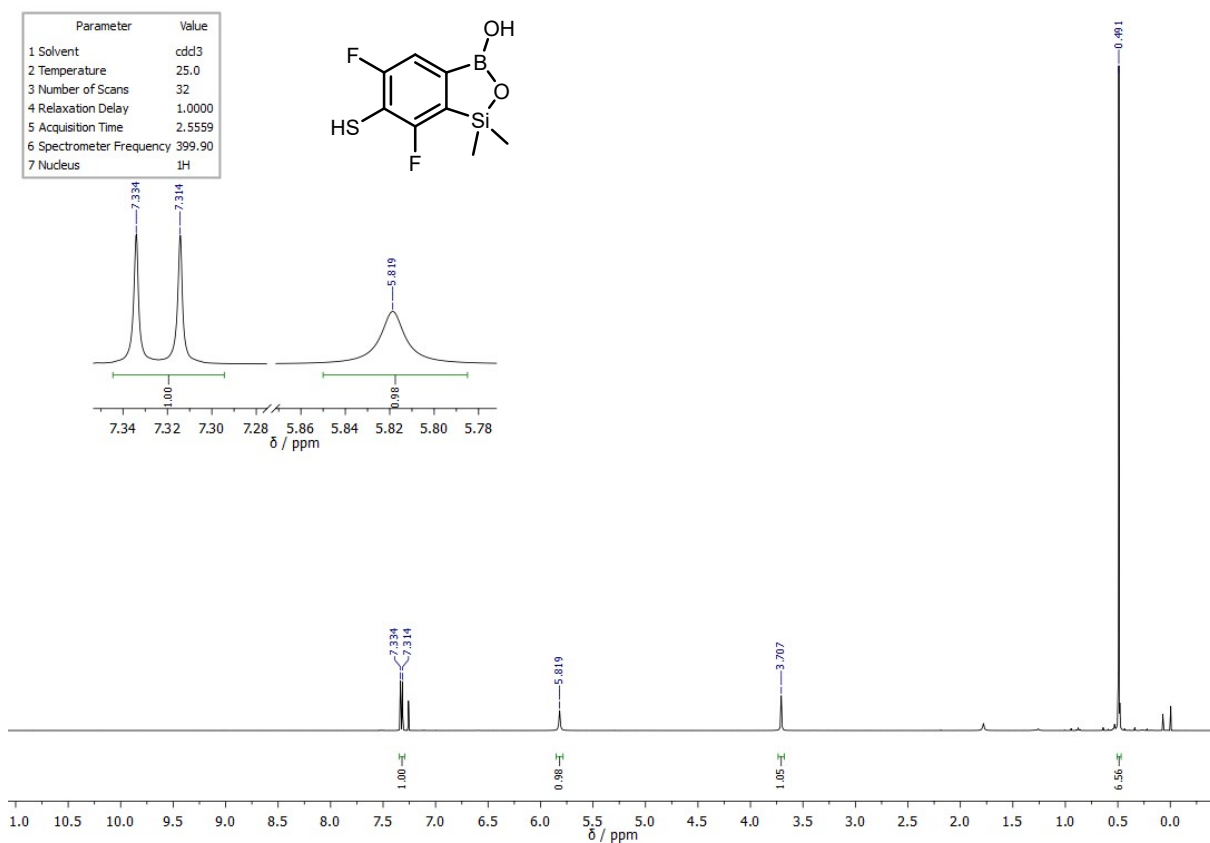

**Figure S17.** <sup>1</sup>H NMR spectrum (400 MHz, CDCl<sub>3</sub>) of **1e**.

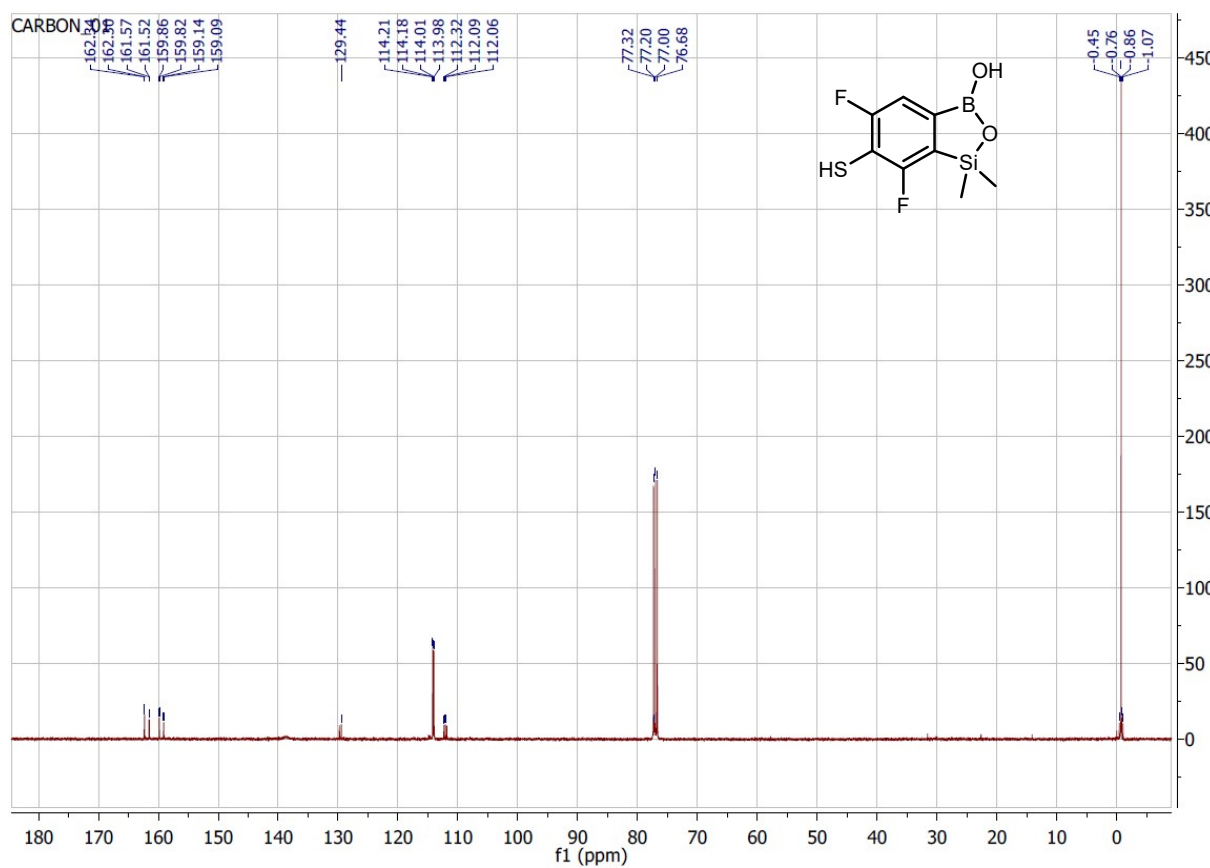

**Figure S18.** <sup>13</sup>C NMR spectrum (101 MHz, CDCl<sub>3</sub>) of **1e**.

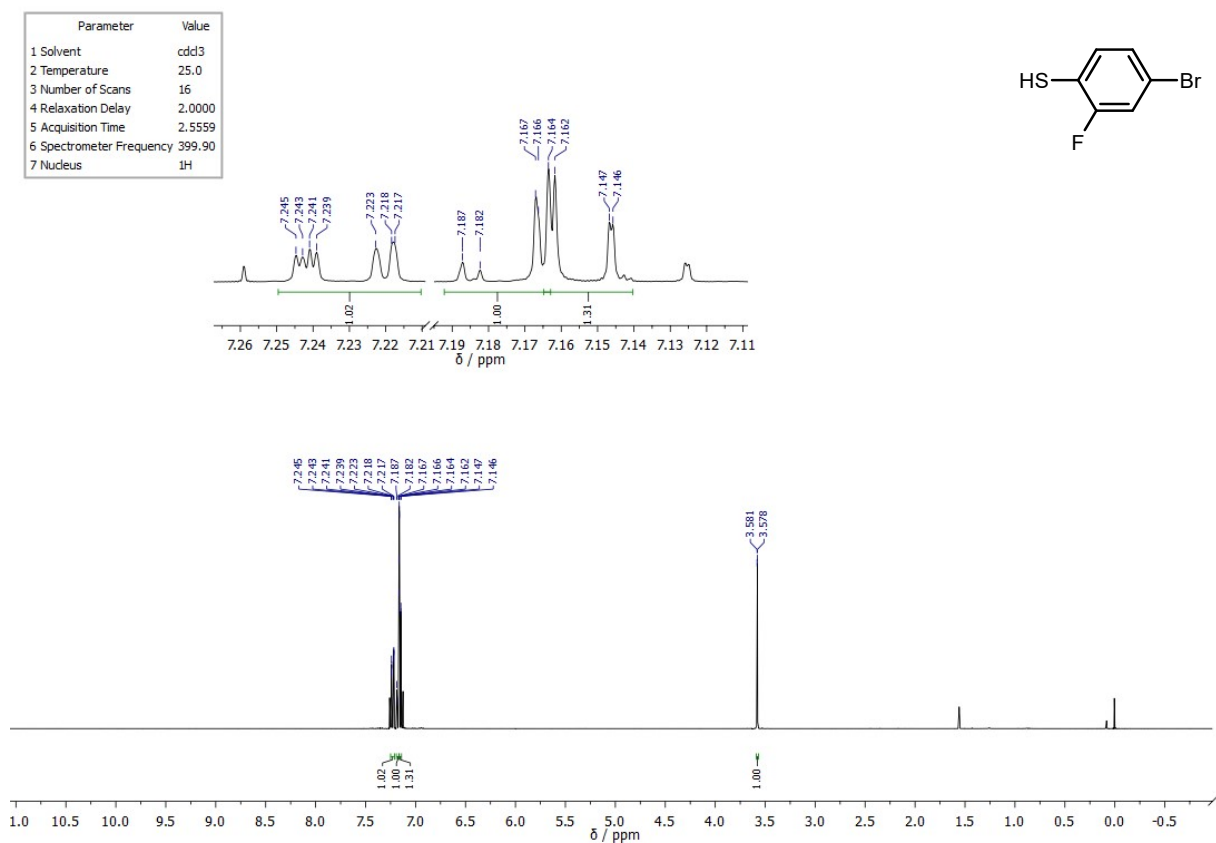

**Figure S19.** <sup>1</sup>H NMR spectrum (400 MHz, CDCl<sub>3</sub>) of **2b**.

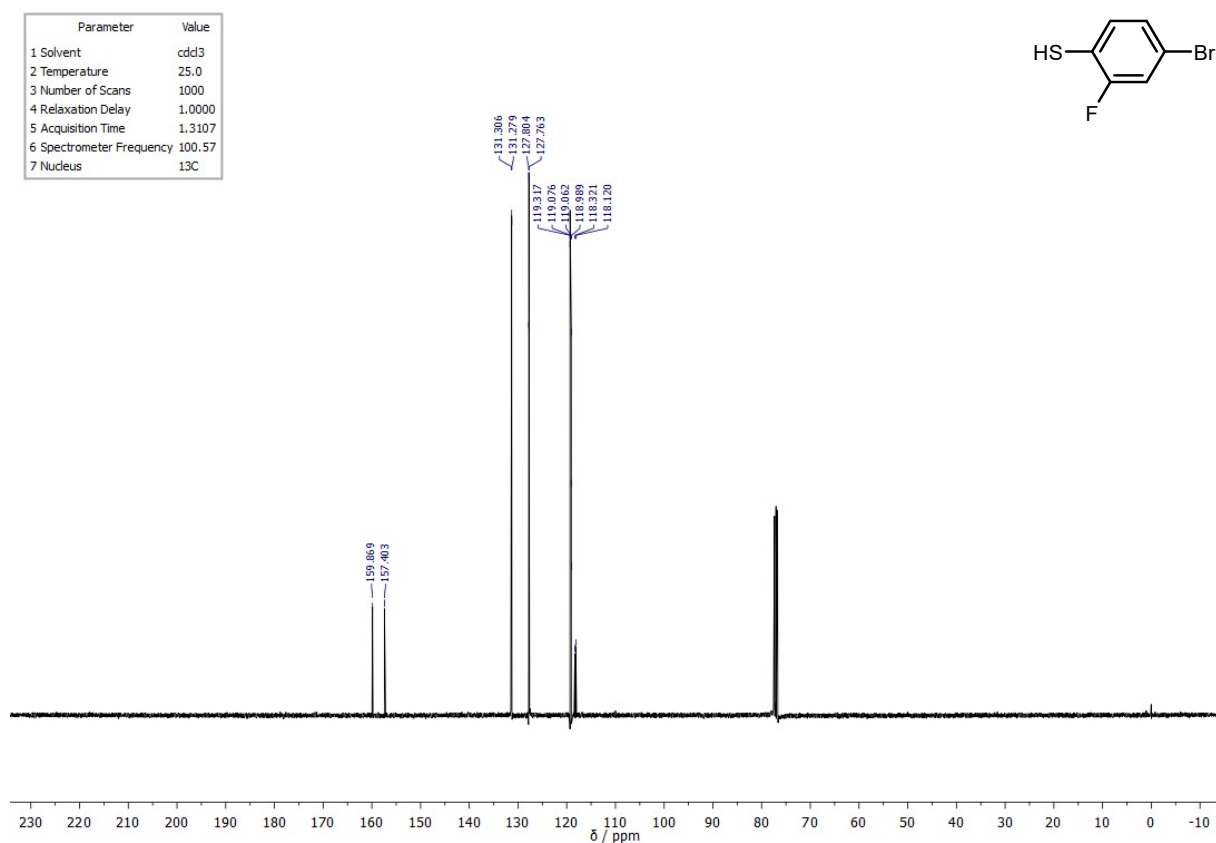

**Figure S20.** <sup>13</sup>C NMR spectrum (101 MHz, CDCl<sub>3</sub>) of **2b**.

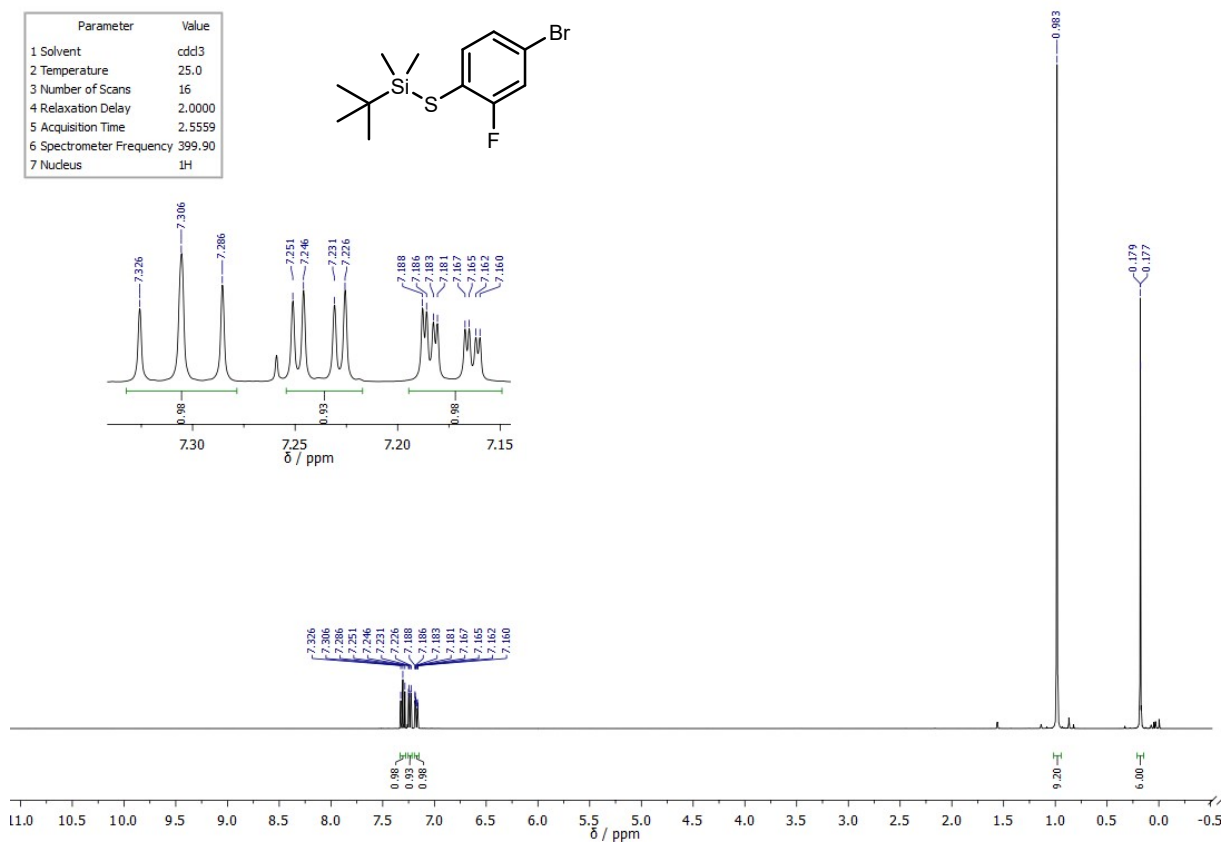

**Figure S21.** <sup>1</sup>H NMR spectrum (400 MHz, CDCl<sub>3</sub>) of **2c**.

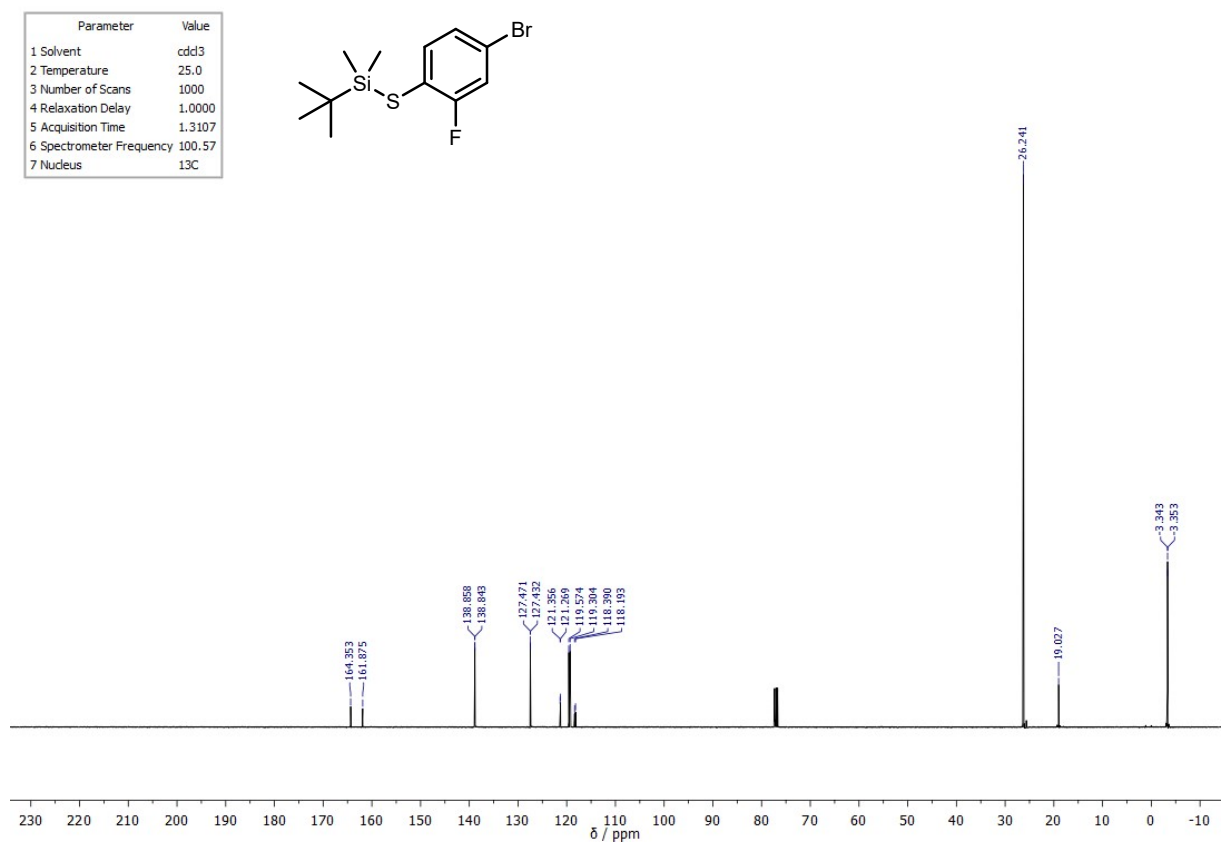

**Figure S22.** <sup>13</sup>C NMR spectrum (101 MHz, CDCl<sub>3</sub>) of **2c**.



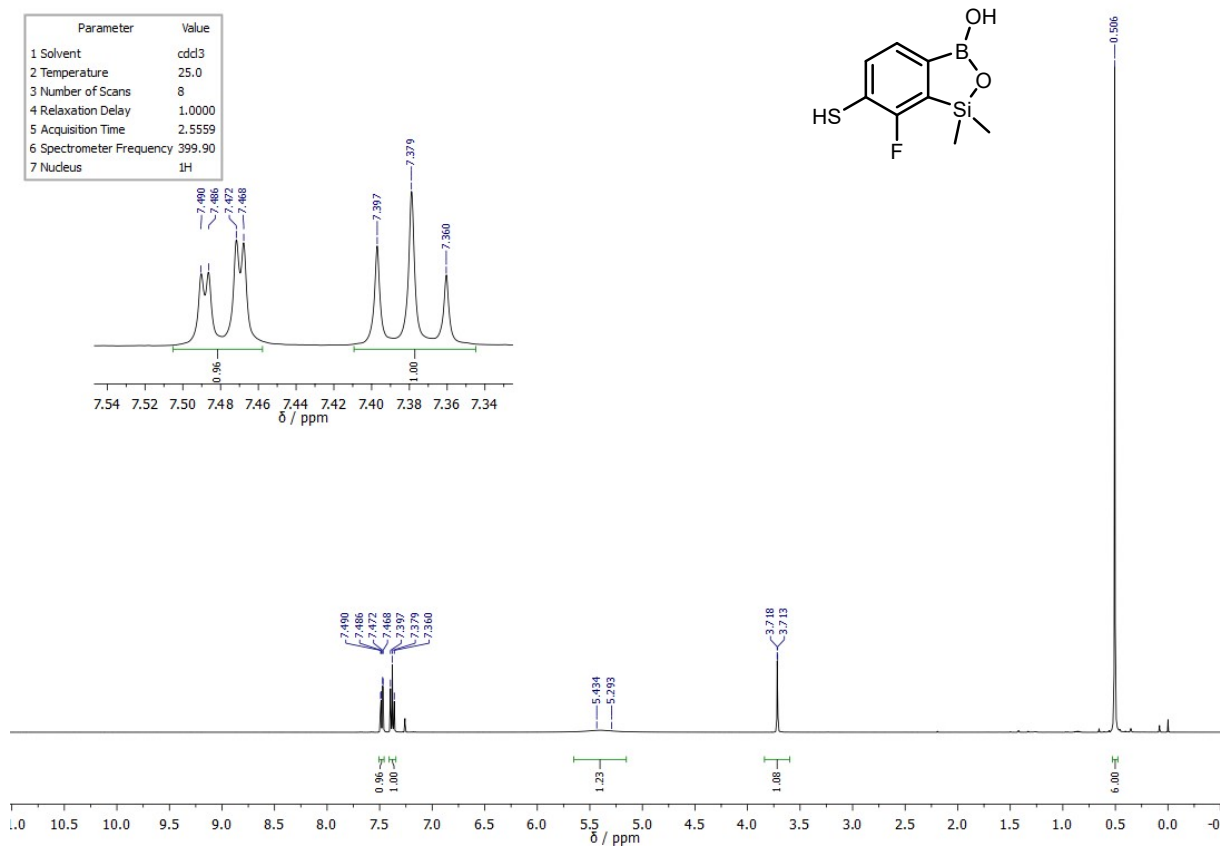

**Figure S25.** <sup>1</sup>H NMR spectrum (400 MHz, CDCl<sub>3</sub>) of **2e**.

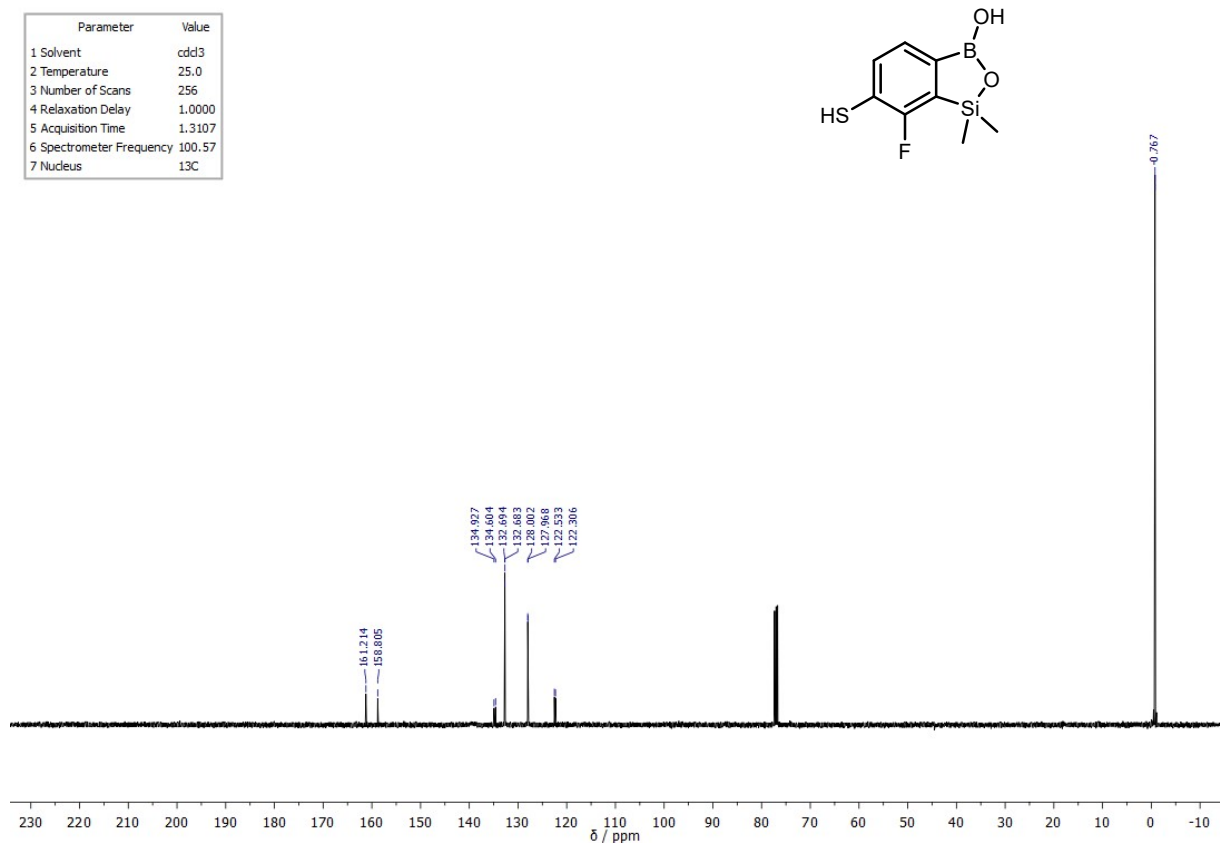

**Figure S26.** <sup>13</sup>C NMR spectrum (101 MHz, CDCl<sub>3</sub>) of **2e**.

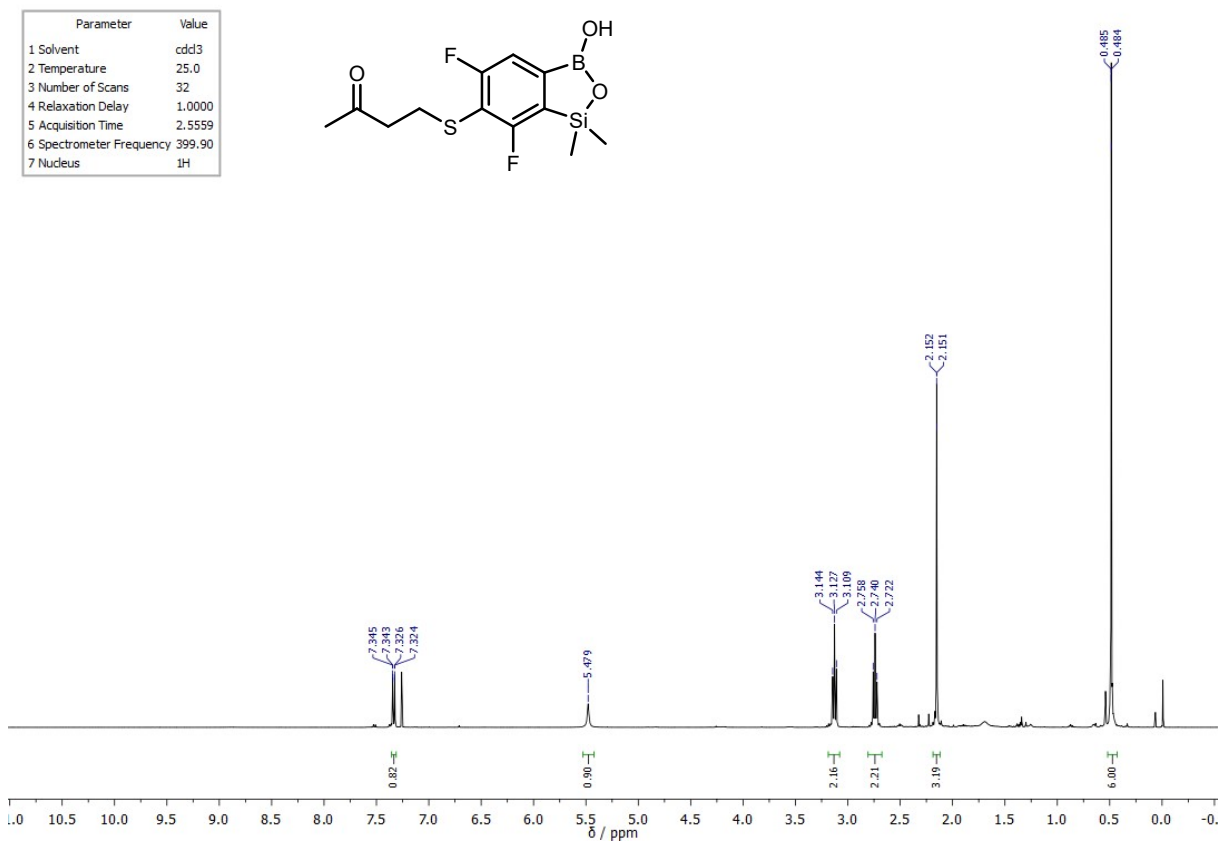

**Figure S27.**  $^1\text{H}$  NMR spectrum (400 MHz,  $\text{CDCl}_3$ ) of **3**.

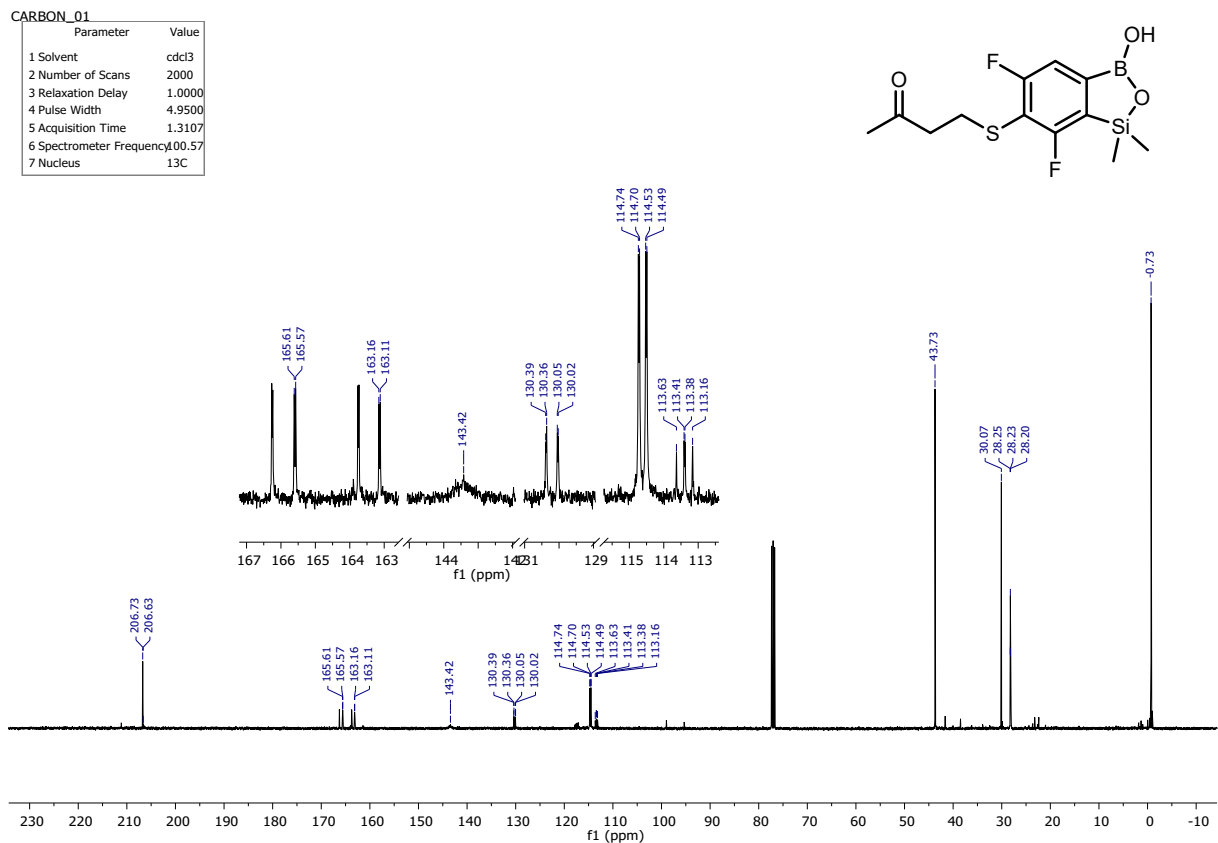

**Figure S28.**  $^{13}\text{C}$  NMR spectrum (101 MHz,  $\text{CDCl}_3$ ) of **3**.

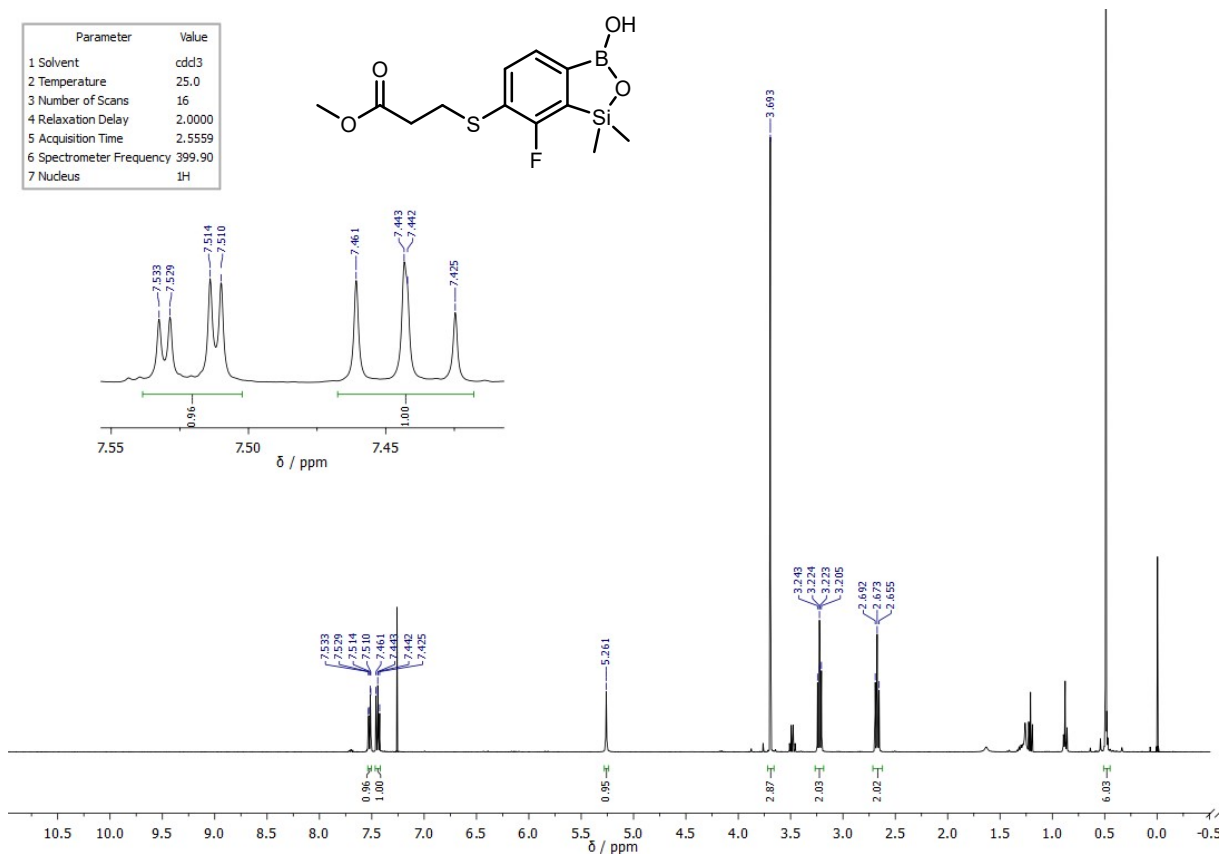

**Figure S29.** <sup>1</sup>H NMR spectrum (400 MHz, CDCl<sub>3</sub>) of 4.

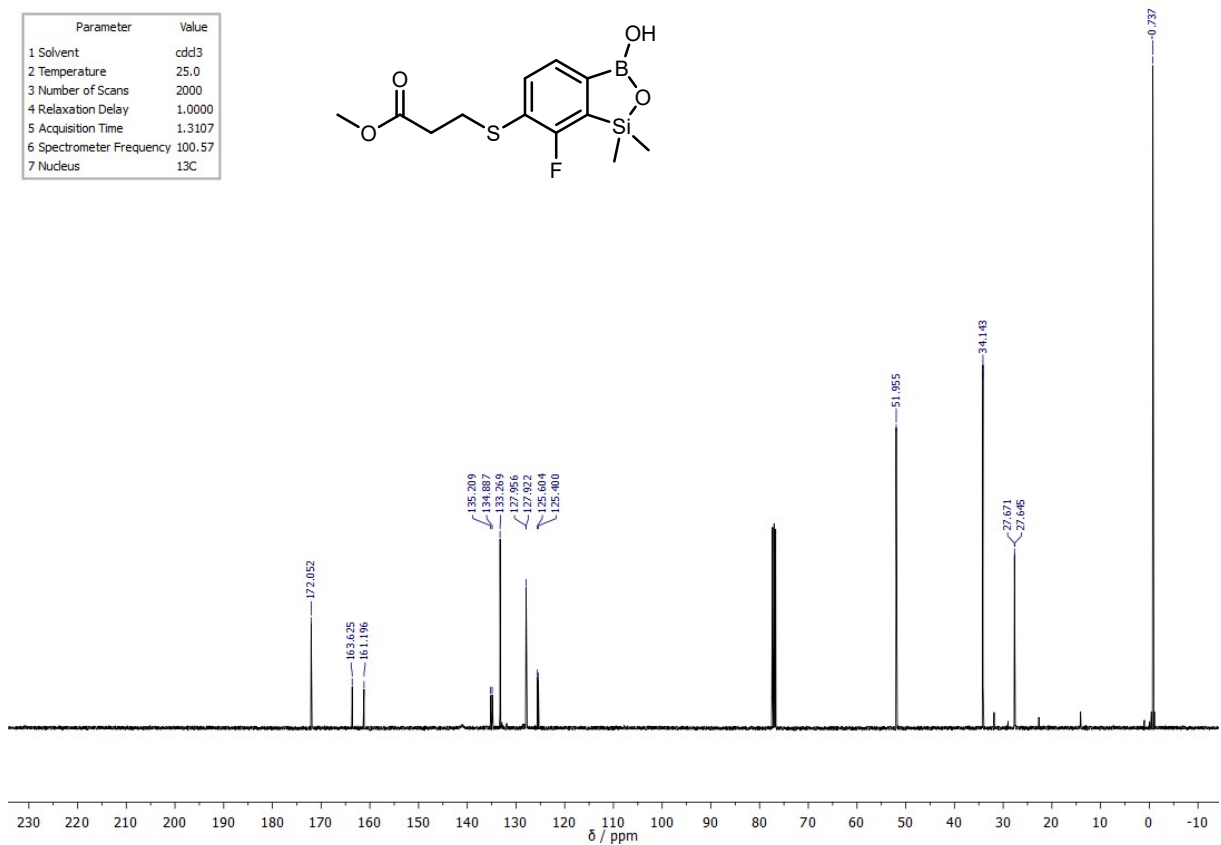

**Figure S30.** <sup>13</sup>C NMR spectrum (101 MHz, CDCl<sub>3</sub>) of 4.

PROTON\_01

| Parameter                | Value   |
|--------------------------|---------|
| 1 Solvent                | cdcl3   |
| 2 Number of Scans        | 16      |
| 3 Relaxation Delay       | 5.0000  |
| 4 Pulse Width            | 4.9000  |
| 5 Acquisition Time       | 2.5559  |
| 6 Spectrometer Frequency | 399.990 |
| 7 Nucleus                | 1H      |

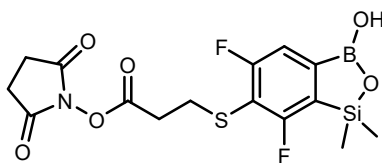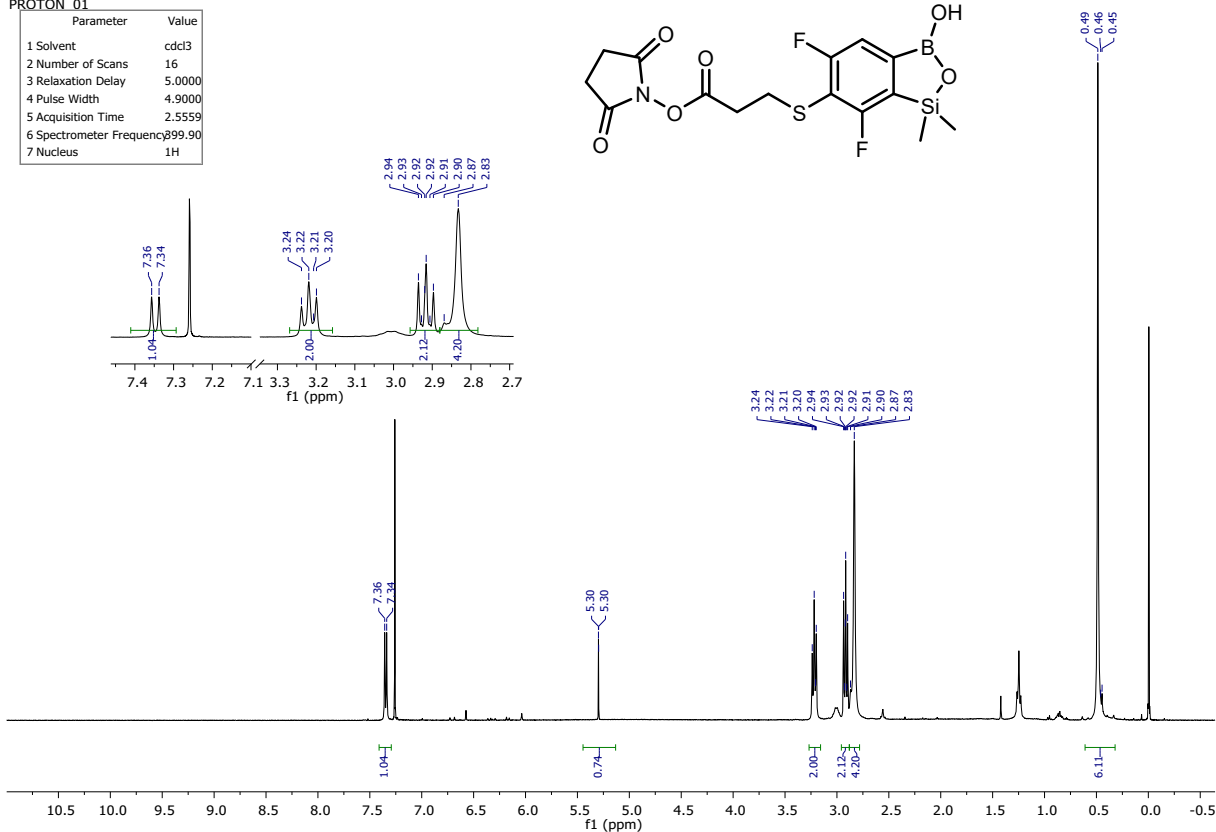

Figure S31.  $^1\text{H}$  NMR spectrum (400 MHz,  $\text{CDCl}_3$ ) of **5**.

KN79\_IIC-CARBON\_01

| Parameter                | Value  |
|--------------------------|--------|
| 1 Solvent                | cdcl3  |
| 2 Number of Scans        | 2000   |
| 3 Relaxation Delay       | 1.0000 |
| 4 Pulse Width            | 4.9500 |
| 5 Acquisition Time       | 1.3107 |
| 6 Spectrometer Frequency | 100.57 |
| 7 Nucleus                | 13C    |

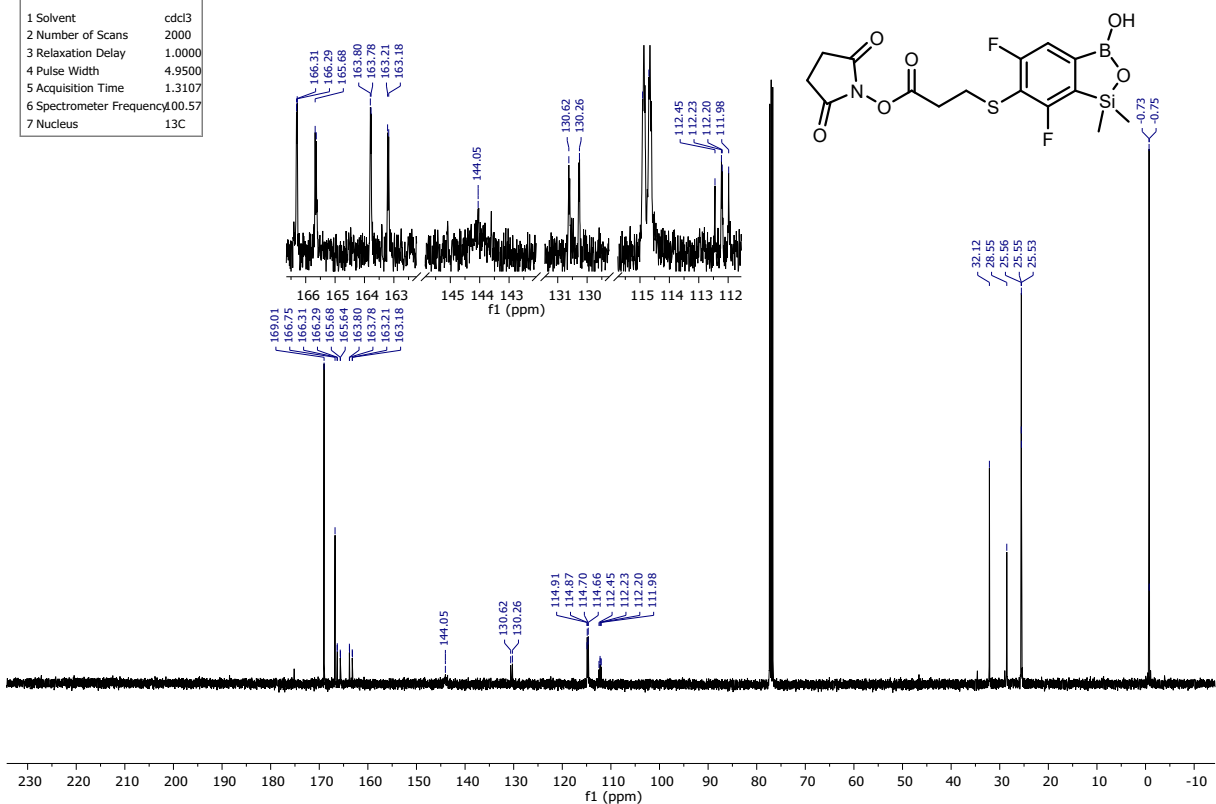

Figure S32.  $^{13}\text{C}$  NMR spectrum (101 MHz,  $\text{CDCl}_3$ ) of **5**.



| PROTON_01                |        |
|--------------------------|--------|
| Parameter                | Value  |
| 1 Solvent                | cdcl3  |
| 2 Number of Scans        | 16     |
| 3 Relaxation Delay       | 2.0000 |
| 4 Pulse Width            | 4.9000 |
| 5 Acquisition Time       | 2.5559 |
| 6 Spectrometer Frequency | 399.90 |
| 7 Nucleus                | 1H     |

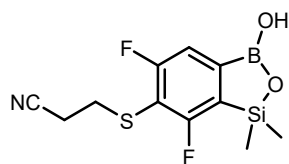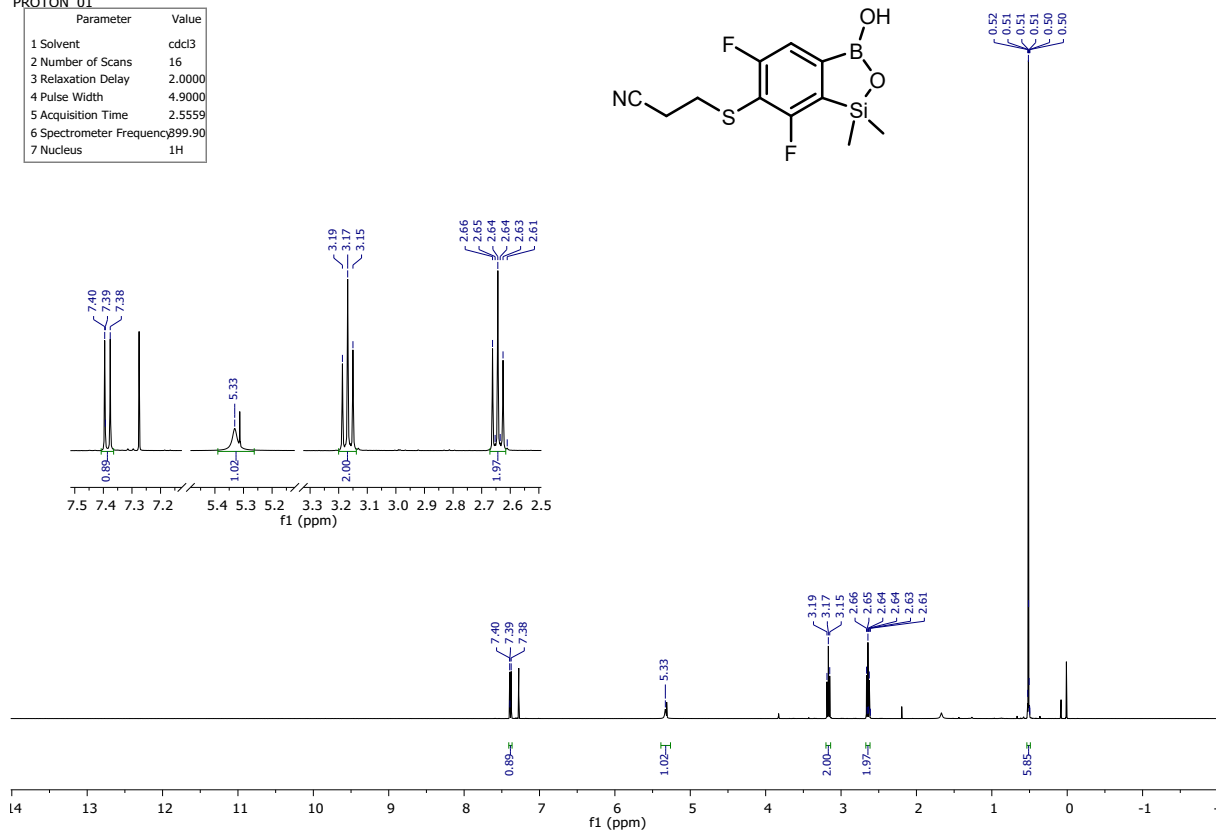

Figure S33.  $^1\text{H}$  NMR spectrum (400 MHz,  $\text{CDCl}_3$ ) of **6**.

| CARBON_01                |                 |
|--------------------------|-----------------|
| Parameter                | Value           |
| 1 Solvent                | cdcl3           |
| 2 Number of Scans        | 2000            |
| 3 Relaxation Delay       | 1.0000          |
| 4 Pulse Width            | 4.9500          |
| 5 Acquisition Time       | 1.3107          |
| 6 Spectrometer Frequency | 100.57          |
| 7 Nucleus                | $^{13}\text{C}$ |

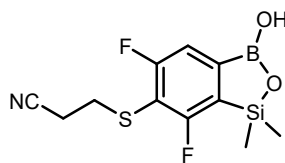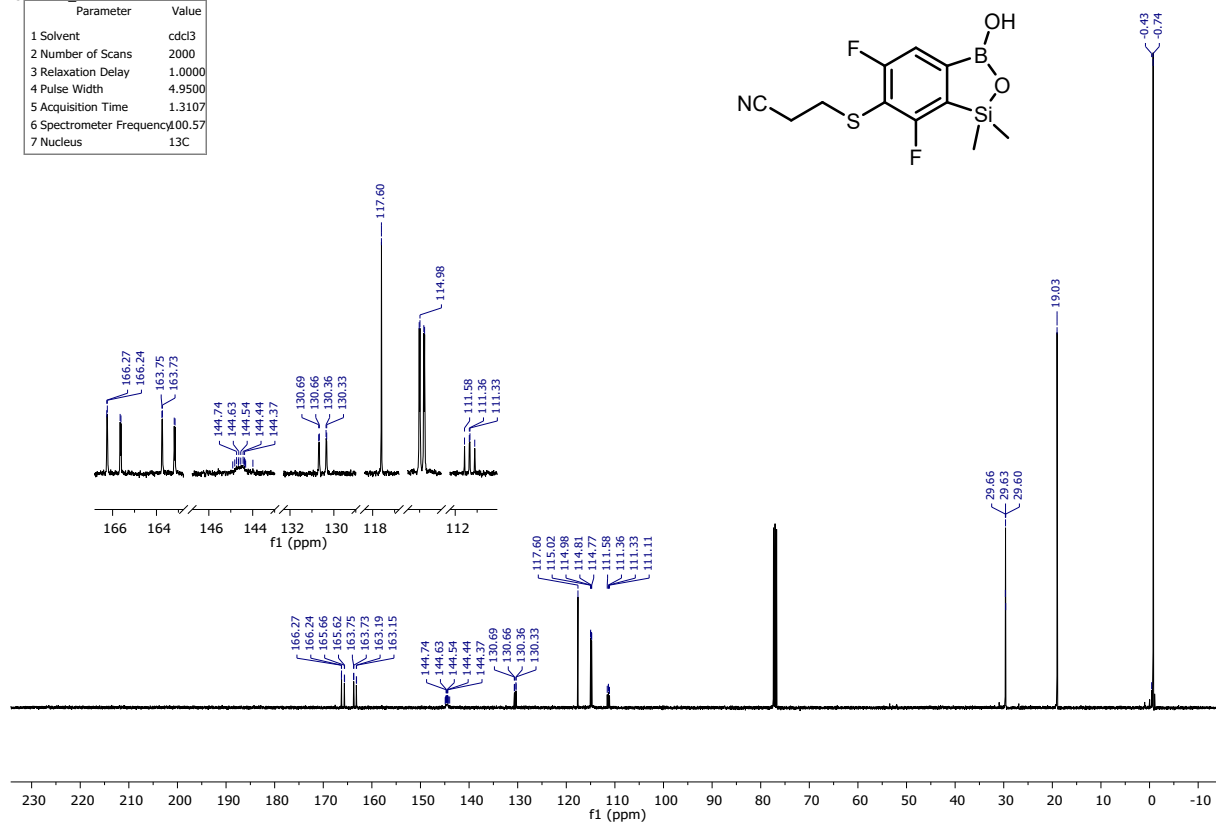

Figure S34.  $^{13}\text{C}$  NMR spectrum (101 MHz,  $\text{CDCl}_3$ ) of **6**.

PROTON\_01

| Parameter                | Value  |
|--------------------------|--------|
| 1 Solvent                | dms0   |
| 2 Number of Scans        | 16     |
| 3 Relaxation Delay       | 5.0000 |
| 4 Pulse Width            | 4.9000 |
| 5 Acquisition Time       | 2.5559 |
| 6 Spectrometer Frequency | 399.90 |
| 7 Nucleus                | 1H     |

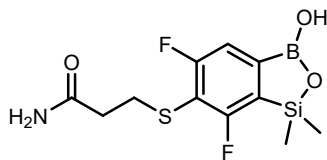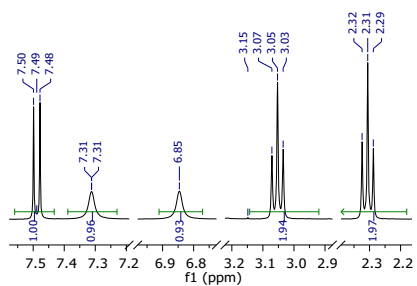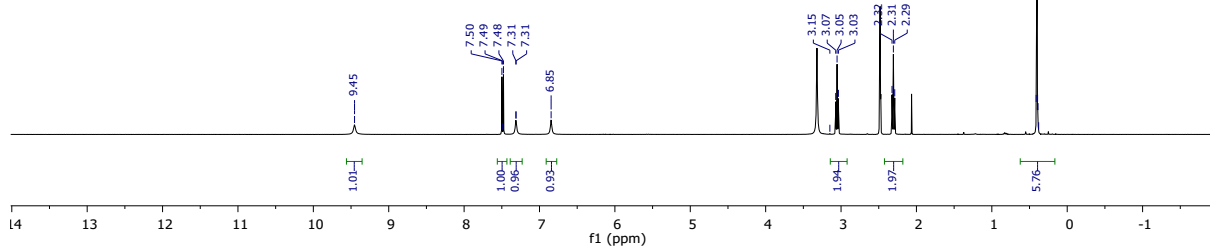

Figure S35.  $^1\text{H}$  NMR spectrum (400 MHz,  $\text{DMSO-}d_6$ ) of 7.

CARBON\_01

| Parameter                | Value  |
|--------------------------|--------|
| 1 Solvent                | dms0   |
| 2 Number of Scans        | 2000   |
| 3 Relaxation Delay       | 1.0000 |
| 4 Pulse Width            | 4.9500 |
| 5 Acquisition Time       | 1.3107 |
| 6 Spectrometer Frequency | 100.57 |
| 7 Nucleus                | 13C    |

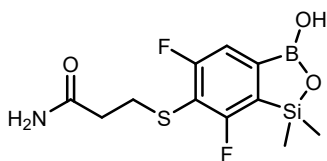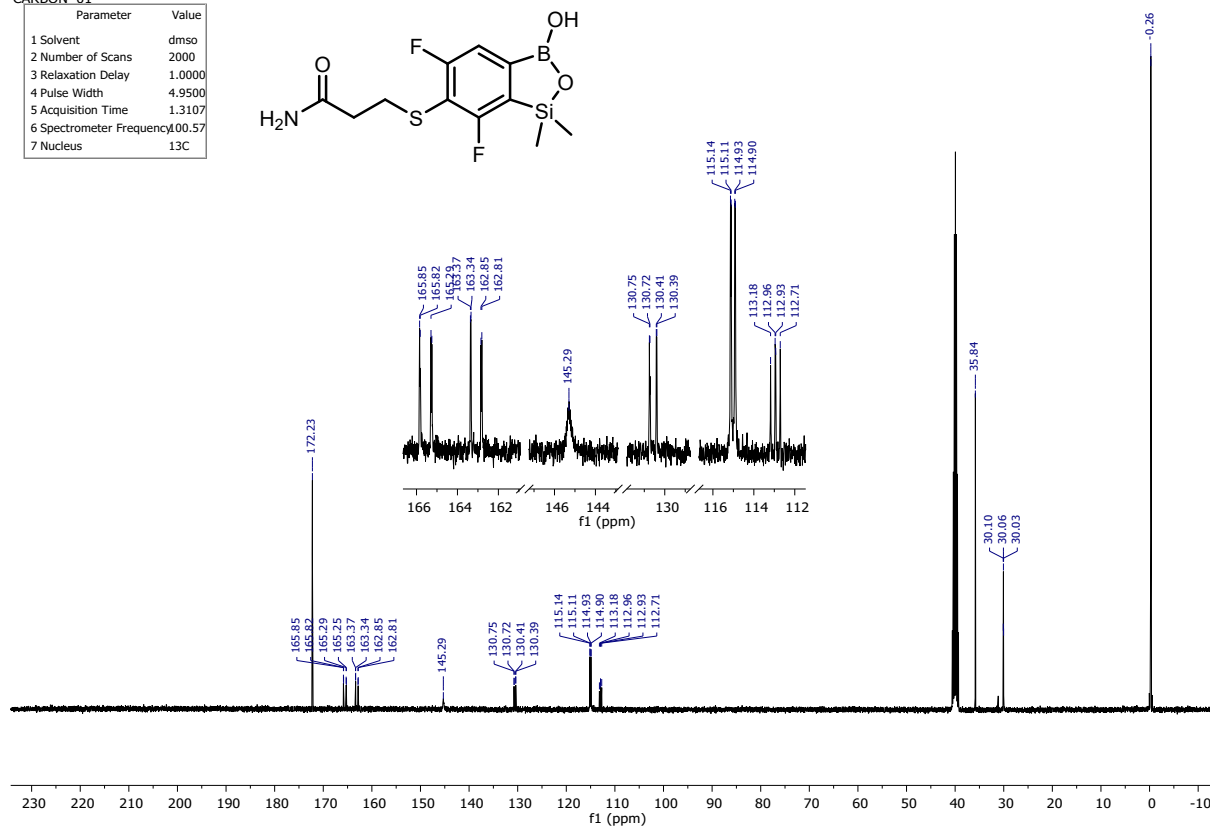

Figure S36.  $^{13}\text{C}$  NMR spectrum (101 MHz,  $\text{DMSO-}d_6$ ) of 7.

PROTON\_01

| Parameter                | Value   |
|--------------------------|---------|
| 1 Solvent                | cdcl3   |
| 2 Number of Scans        | 16      |
| 3 Relaxation Delay       | 5.0000  |
| 4 Pulse Width            | 4.9000  |
| 5 Acquisition Time       | 2.5559  |
| 6 Spectrometer Frequency | 399.990 |
| 7 Nucleus                | 1H      |

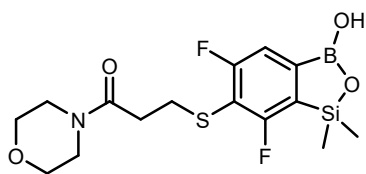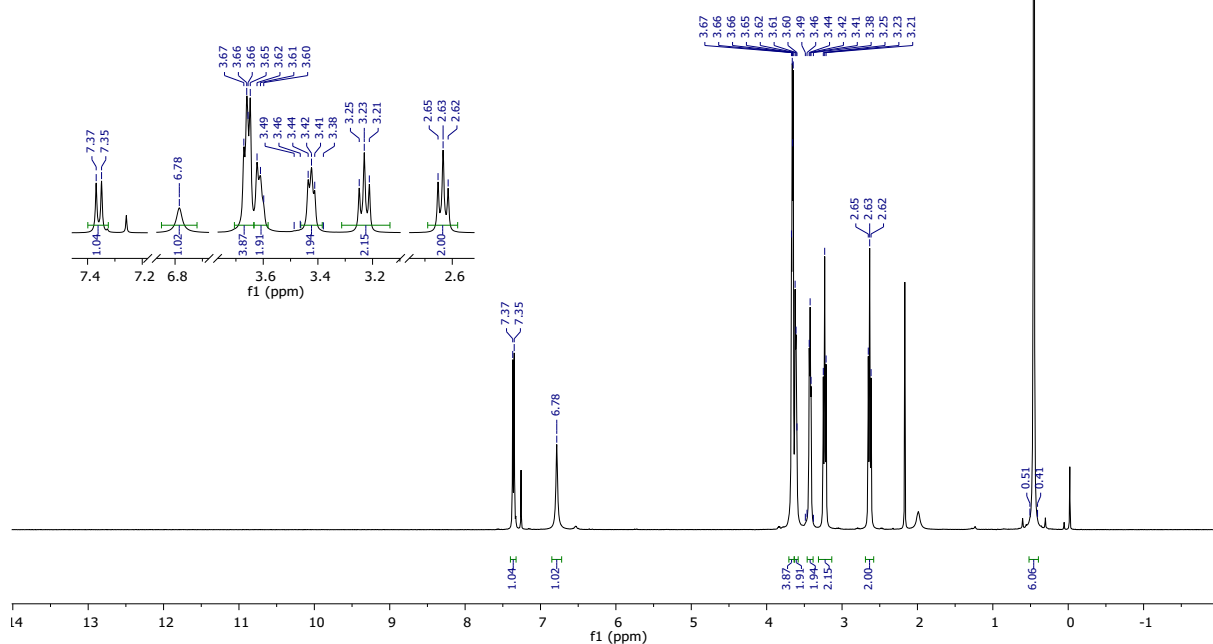

Figure S37. <sup>1</sup>H NMR spectrum (400 MHz, CDCl<sub>3</sub>) of **8**.

CARBON\_01

| Parameter                | Value  |
|--------------------------|--------|
| 1 Solvent                | cdcl3  |
| 2 Number of Scans        | 2000   |
| 3 Relaxation Delay       | 1.0000 |
| 4 Pulse Width            | 4.9500 |
| 5 Acquisition Time       | 1.3107 |
| 6 Spectrometer Frequency | 100.57 |
| 7 Nucleus                | 13C    |

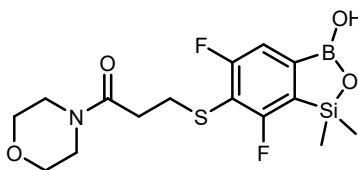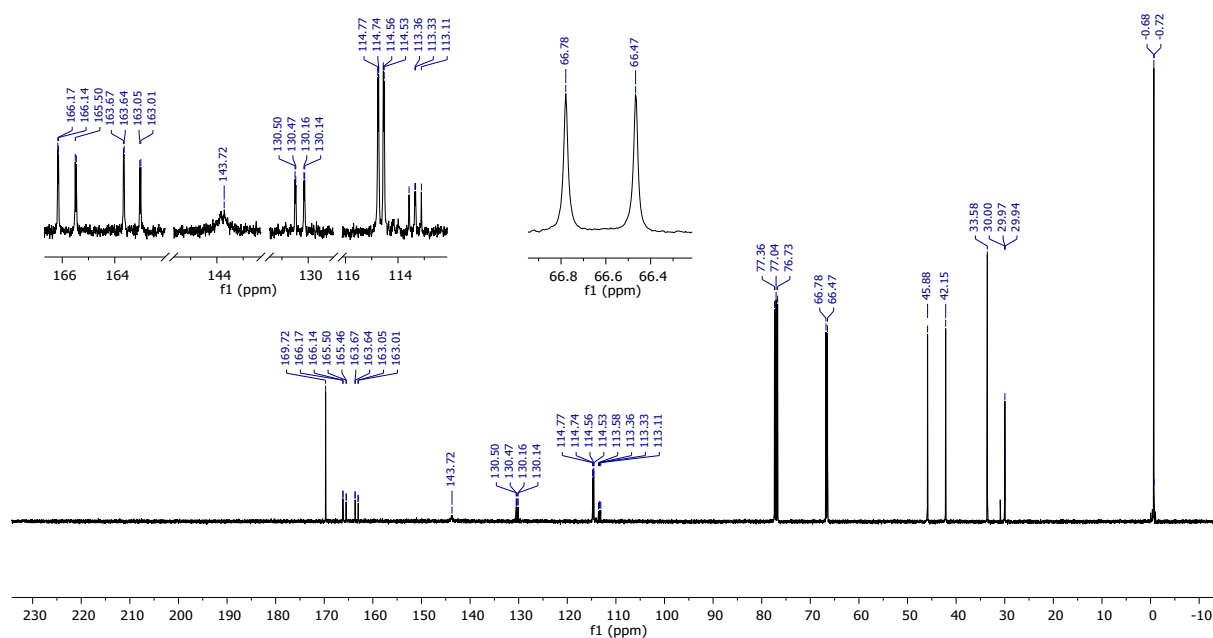

Figure S38. <sup>13</sup>C NMR spectrum (101 MHz, CDCl<sub>3</sub>) of **8**.

| PROTON_01                |        |
|--------------------------|--------|
| Parameter                | Value  |
| 1 Solvent                | dmsd   |
| 2 Number of Scans        | 16     |
| 3 Relaxation Delay       | 5.0000 |
| 4 Pulse Width            | 4.3000 |
| 5 Acquisition Time       | 2.5559 |
| 6 Spectrometer Frequency | 399.72 |
| 7 Nucleus                | 1H     |

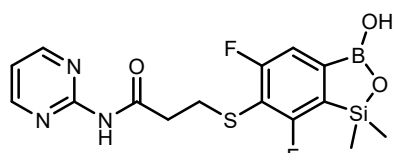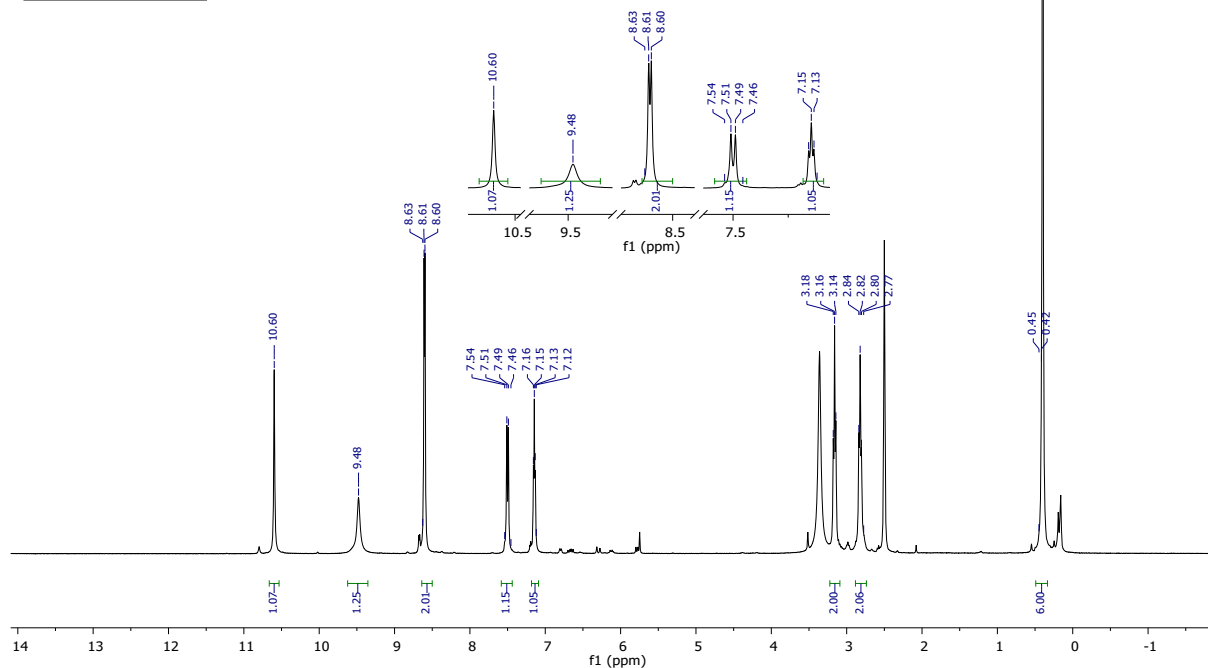

**Figure S39.**  $^1\text{H}$  NMR spectrum (400 MHz,  $\text{DMSO-}d_6$ ) of **9**.

| CARBON_01                |        |
|--------------------------|--------|
| Parameter                | Value  |
| 1 Solvent                | dmsd   |
| 2 Number of Scans        | 2000   |
| 3 Relaxation Delay       | 1.0000 |
| 4 Pulse Width            | 4.6000 |
| 5 Acquisition Time       | 1.3107 |
| 6 Spectrometer Frequency | 100.52 |
| 7 Nucleus                | 13C    |

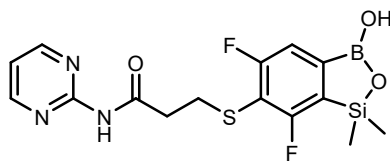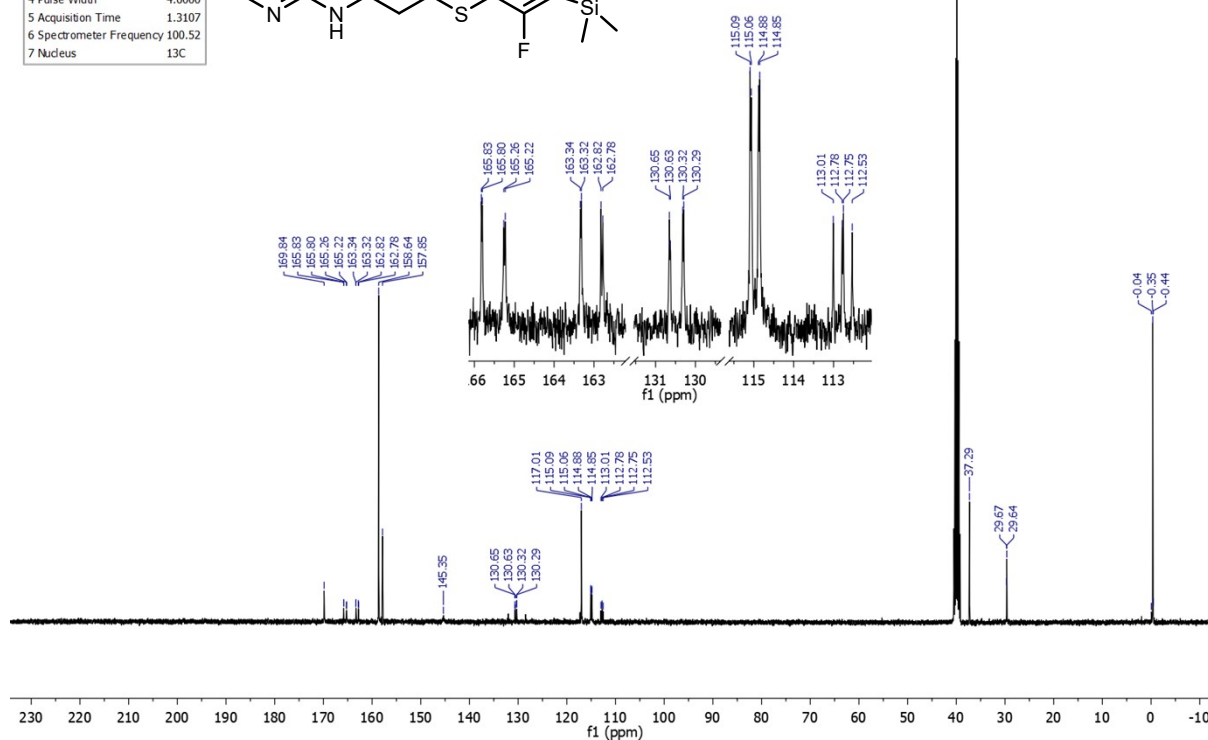

**Figure S40.**  $^{13}\text{C}$  NMR spectrum (101 MHz,  $\text{DMSO-}d_6$ ) of **9**.

PROTON\_01

| Parameter                | Value  |
|--------------------------|--------|
| 1 Solvent                | cdcl3  |
| 2 Number of Scans        | 16     |
| 3 Relaxation Delay       | 2.0000 |
| 4 Pulse Width            | 4.9000 |
| 5 Acquisition Time       | 2.5559 |
| 6 Spectrometer Frequency | 399.90 |
| 7 Nucleus                | 1H     |

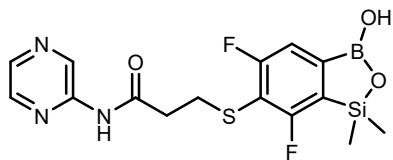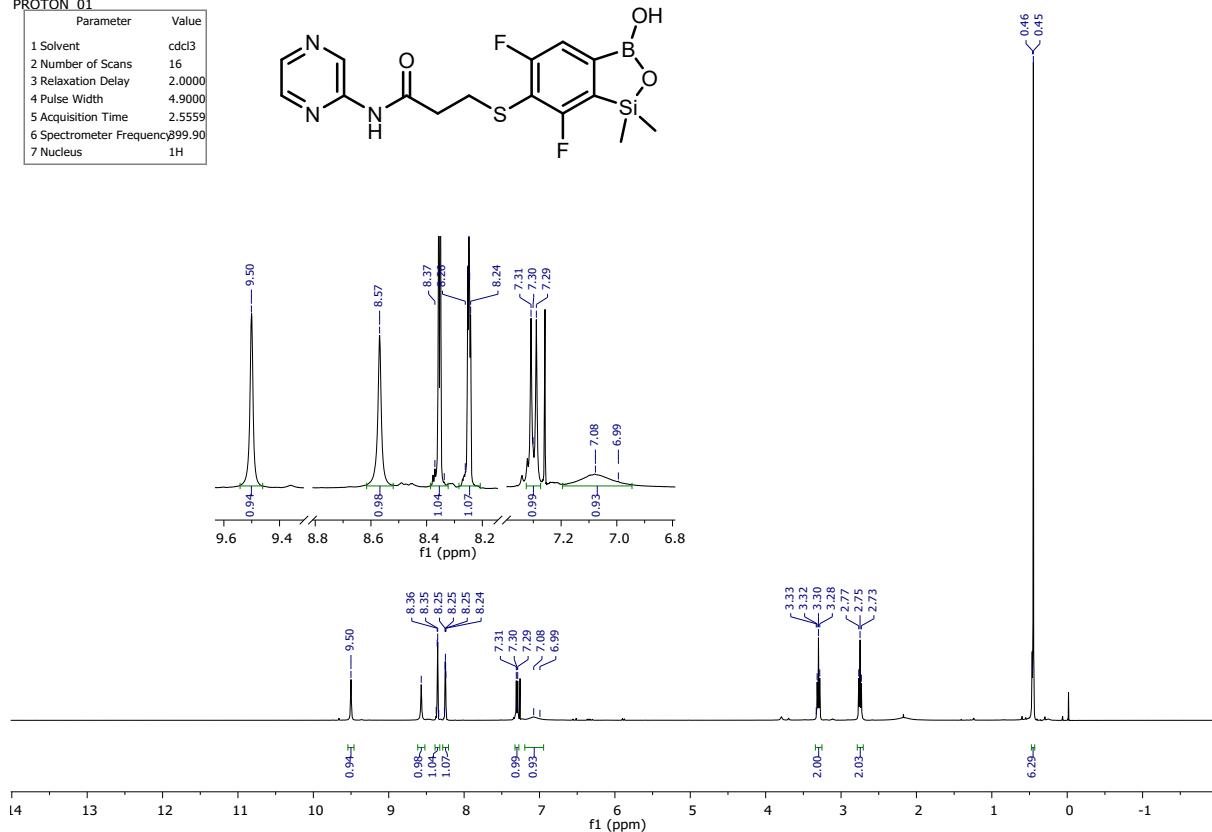

Figure S41. <sup>1</sup>H NMR spectrum (400 MHz, CDCl<sub>3</sub>) of 10.

CARBON\_01

| Parameter                | Value  |
|--------------------------|--------|
| 1 Solvent                | cdcl3  |
| 2 Number of Scans        | 2000   |
| 3 Relaxation Delay       | 1.0000 |
| 4 Pulse Width            | 4.9500 |
| 5 Acquisition Time       | 1.3107 |
| 6 Spectrometer Frequency | 100.57 |
| 7 Nucleus                | 13C    |

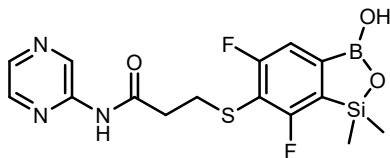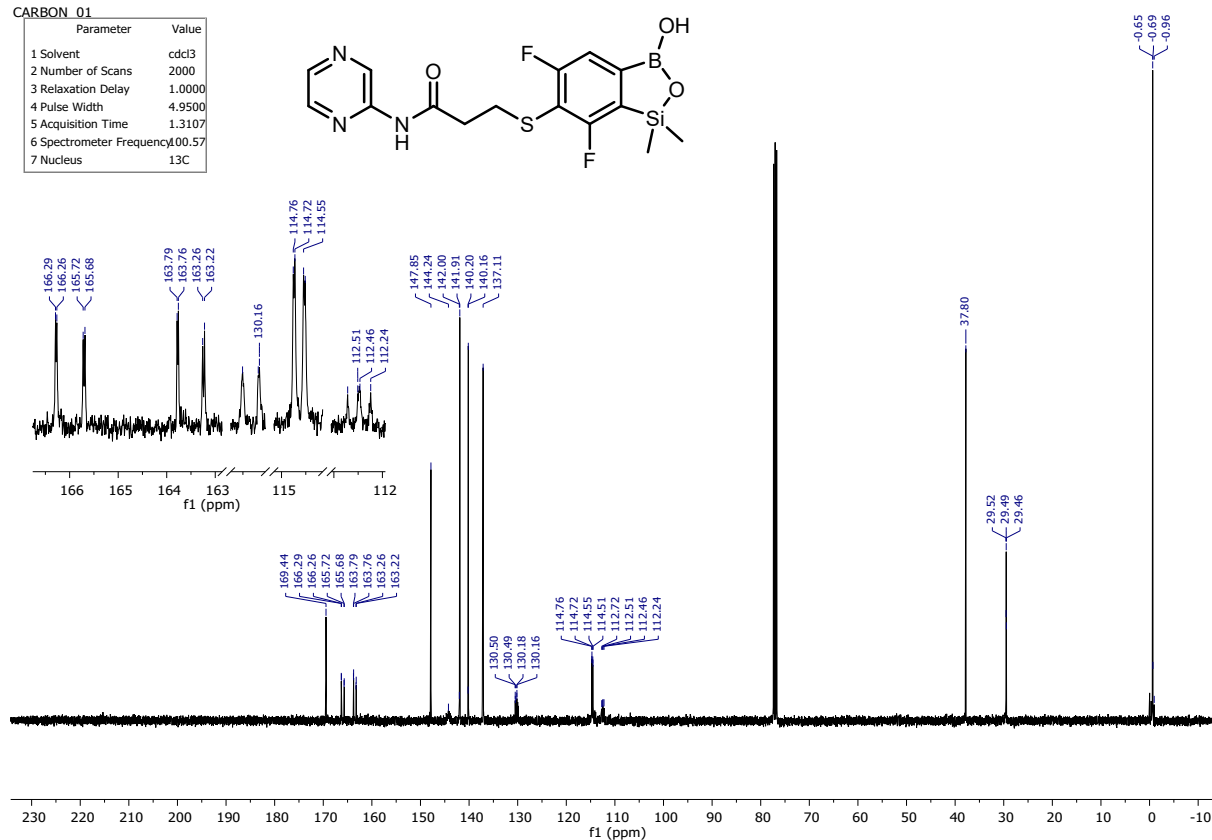

Figure S42. <sup>13</sup>C NMR spectrum (101 MHz, CDCl<sub>3</sub>) of 10.

PROTON\_01

| Parameter                | Value          |
|--------------------------|----------------|
| 1 Solvent                | acetone        |
| 2 Number of Scans        | 16             |
| 3 Relaxation Delay       | 2.0000         |
| 4 Pulse Width            | 4.9000         |
| 5 Acquisition Time       | 2.5559         |
| 6 Spectrometer Frequency | 399.90         |
| 7 Nucleus                | <sup>1</sup> H |

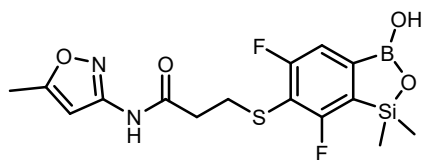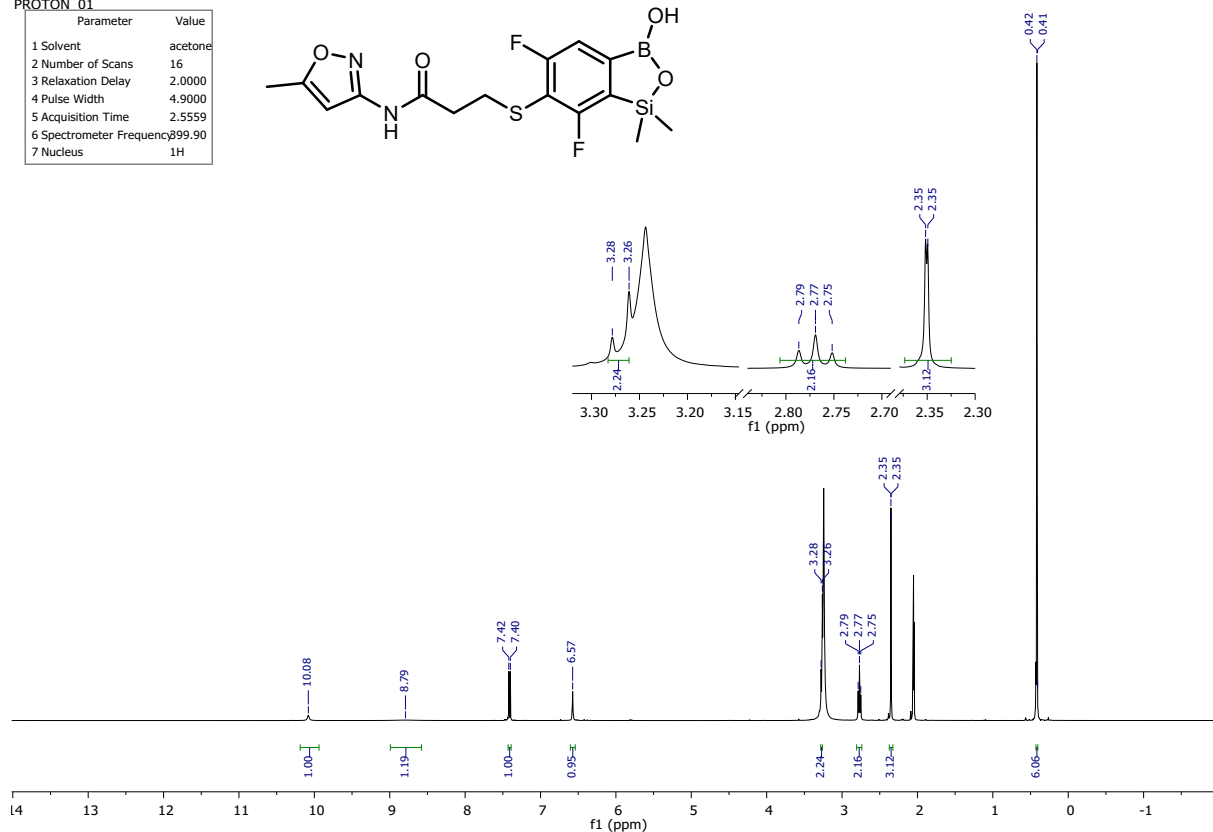

Figure S43. <sup>1</sup>H NMR spectrum (400 MHz, acetone-*d*<sub>6</sub>) of **11**.

CARBON\_01

| Parameter                | Value           |
|--------------------------|-----------------|
| 1 Solvent                | acetone         |
| 2 Number of Scans        | 2000            |
| 3 Relaxation Delay       | 1.0000          |
| 4 Pulse Width            | 4.9500          |
| 5 Acquisition Time       | 1.3107          |
| 6 Spectrometer Frequency | 100.57          |
| 7 Nucleus                | <sup>13</sup> C |

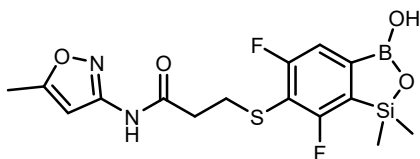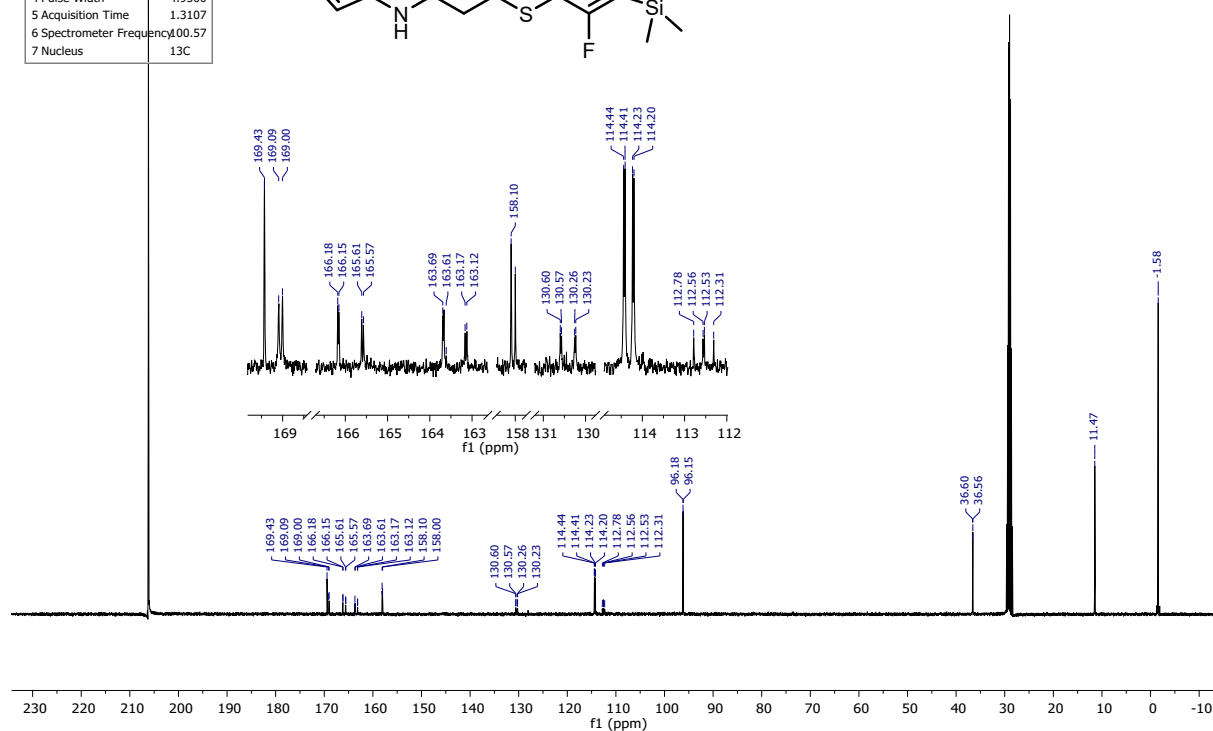

Figure S44. <sup>13</sup>C NMR spectrum (101 MHz, acetone-*d*<sub>6</sub>) of **11**.

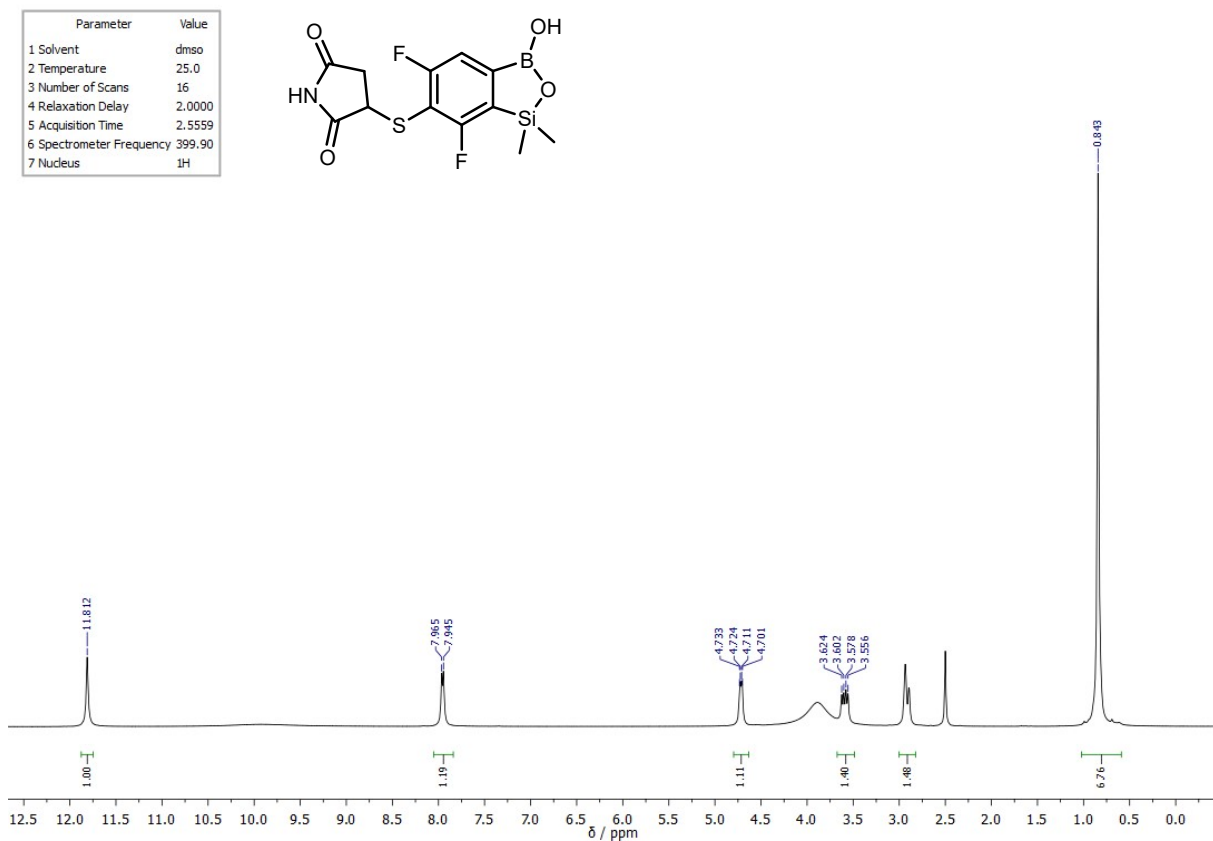

**Figure S45.** <sup>1</sup>H NMR spectrum (400 MHz, DMSO-*d*<sub>6</sub>) of 12.

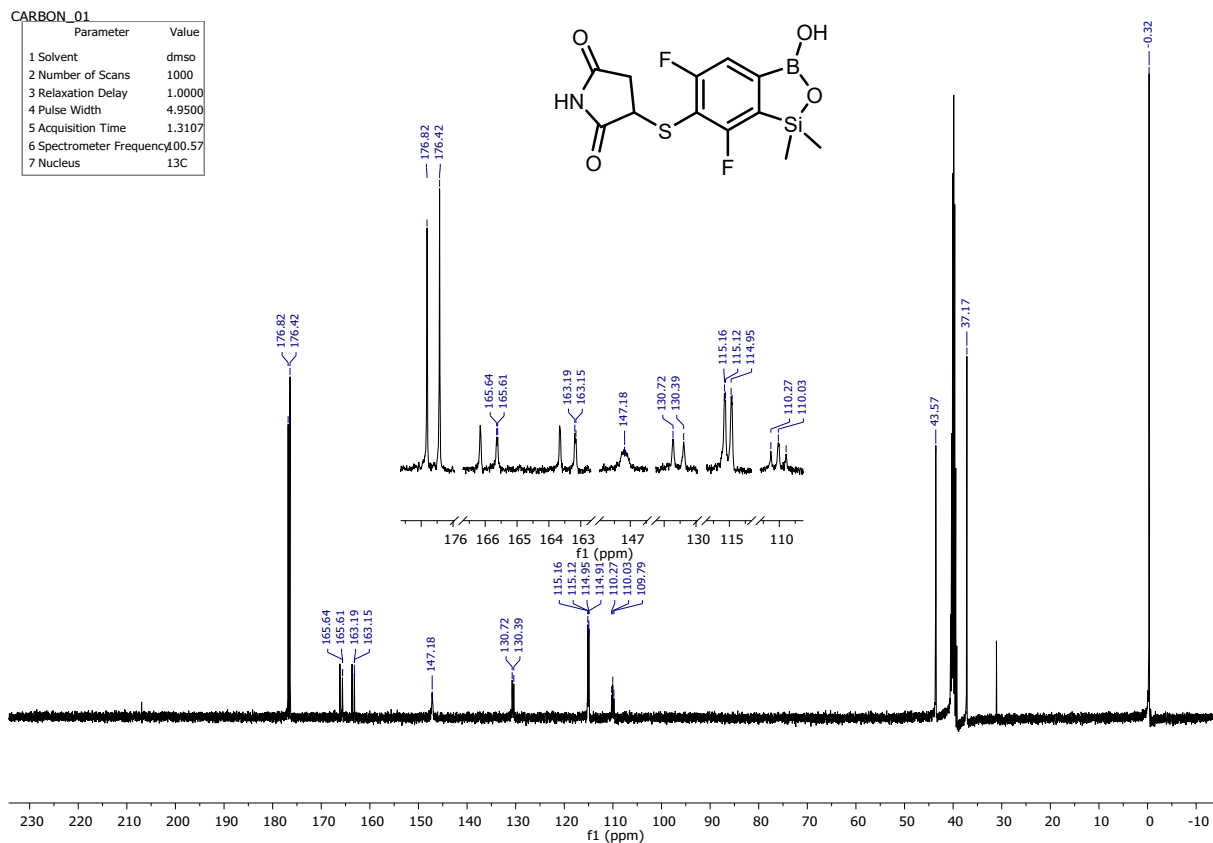

**Figure S46.** <sup>13</sup>C NMR spectrum (101 MHz, DMSO-*d*<sub>6</sub>) of 12.

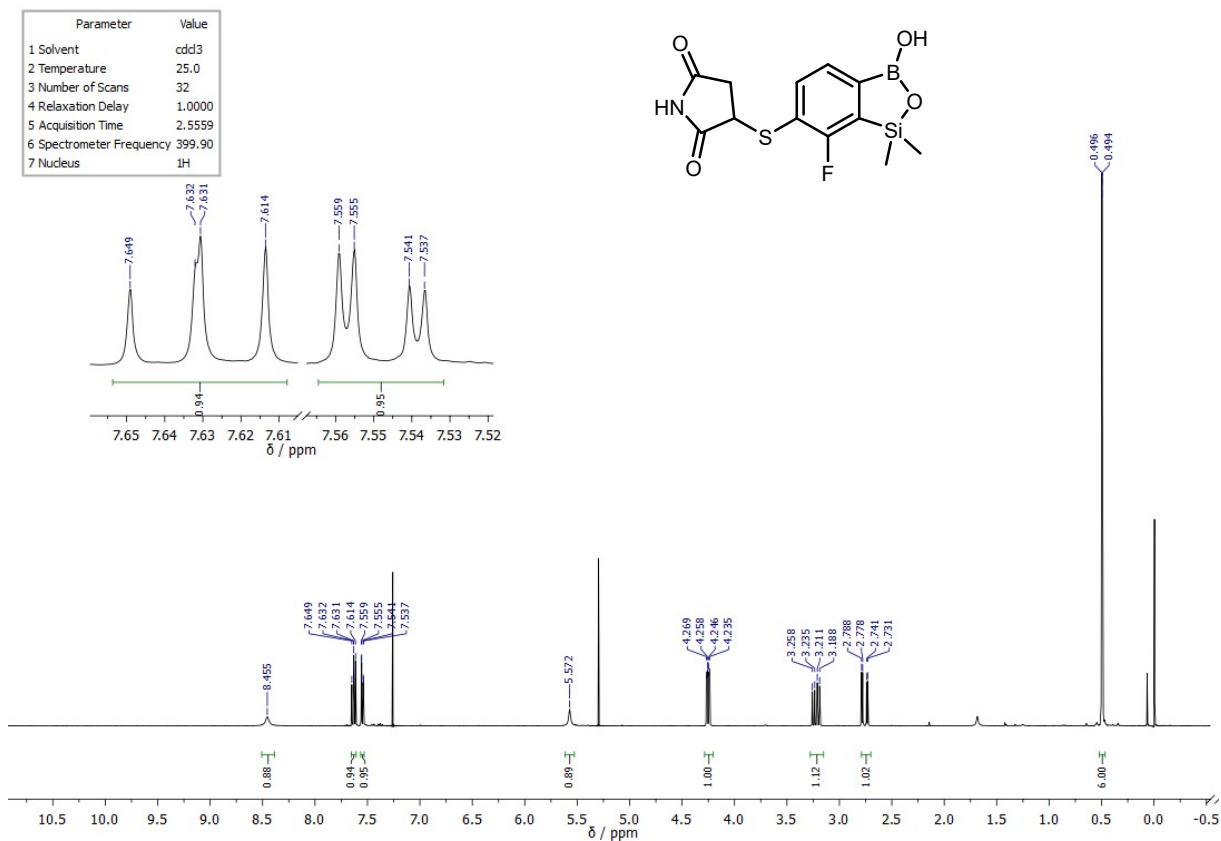

**Figure S47.** <sup>1</sup>H NMR spectrum (400 MHz, CDCl<sub>3</sub>) of **13**.

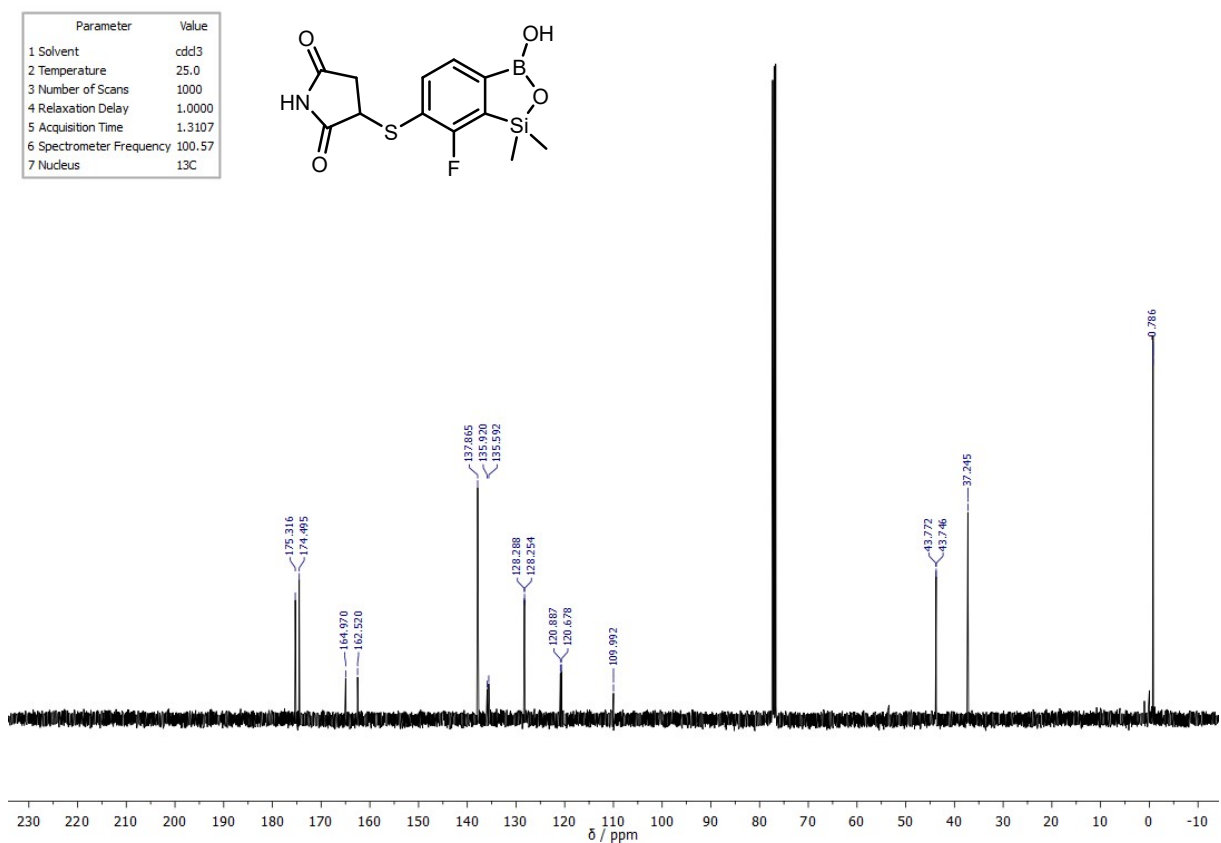

**Figure S48.** <sup>13</sup>C NMR spectrum (101 MHz, CDCl<sub>3</sub>) of **13**.



PROTON\_01

| Parameter                | Value          |
|--------------------------|----------------|
| 1 Solvent                | acetone        |
| 2 Number of Scans        | 16             |
| 3 Relaxation Delay       | 5.0000         |
| 4 Pulse Width            | 4.9000         |
| 5 Acquisition Time       | 2.5559         |
| 6 Spectrometer Frequency | 399.90         |
| 7 Nucleus                | <sup>1</sup> H |

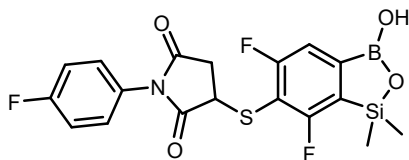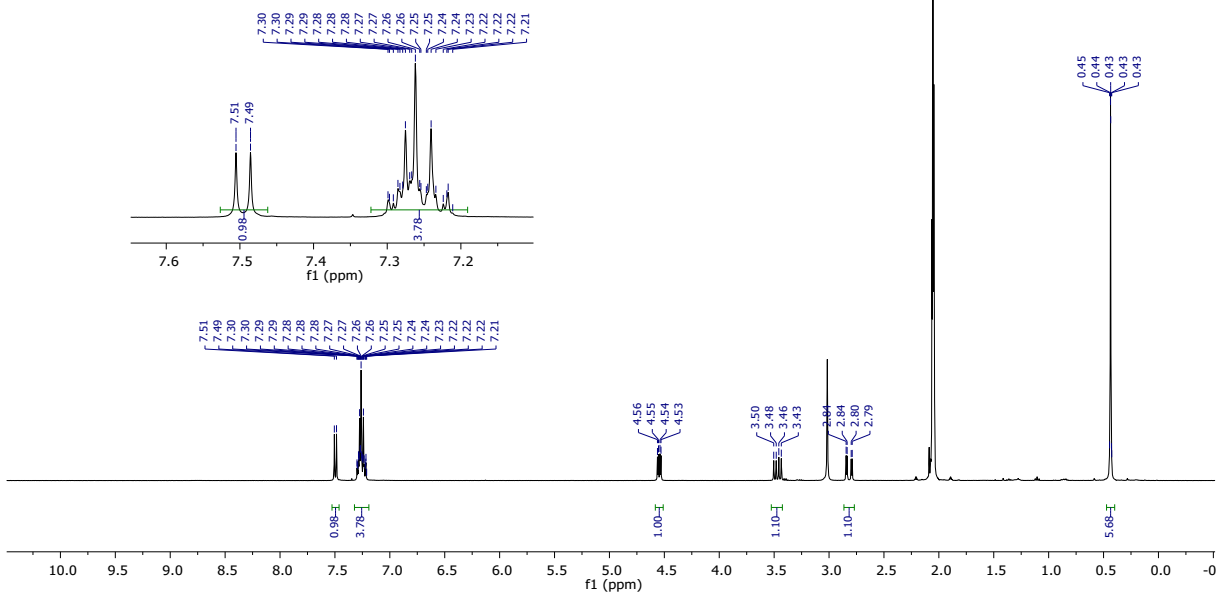

Figure S49. <sup>1</sup>H NMR spectrum (400 MHz, acetone-*d*<sub>6</sub>) of 14.

CARBON\_01

| Parameter                | Value           |
|--------------------------|-----------------|
| 1 Solvent                | acetone         |
| 2 Number of Scans        | 2000            |
| 3 Relaxation Delay       | 1.0000          |
| 4 Pulse Width            | 4.6000          |
| 5 Acquisition Time       | 1.3107          |
| 6 Spectrometer Frequency | 100.52          |
| 7 Nucleus                | <sup>13</sup> C |

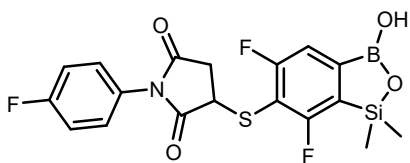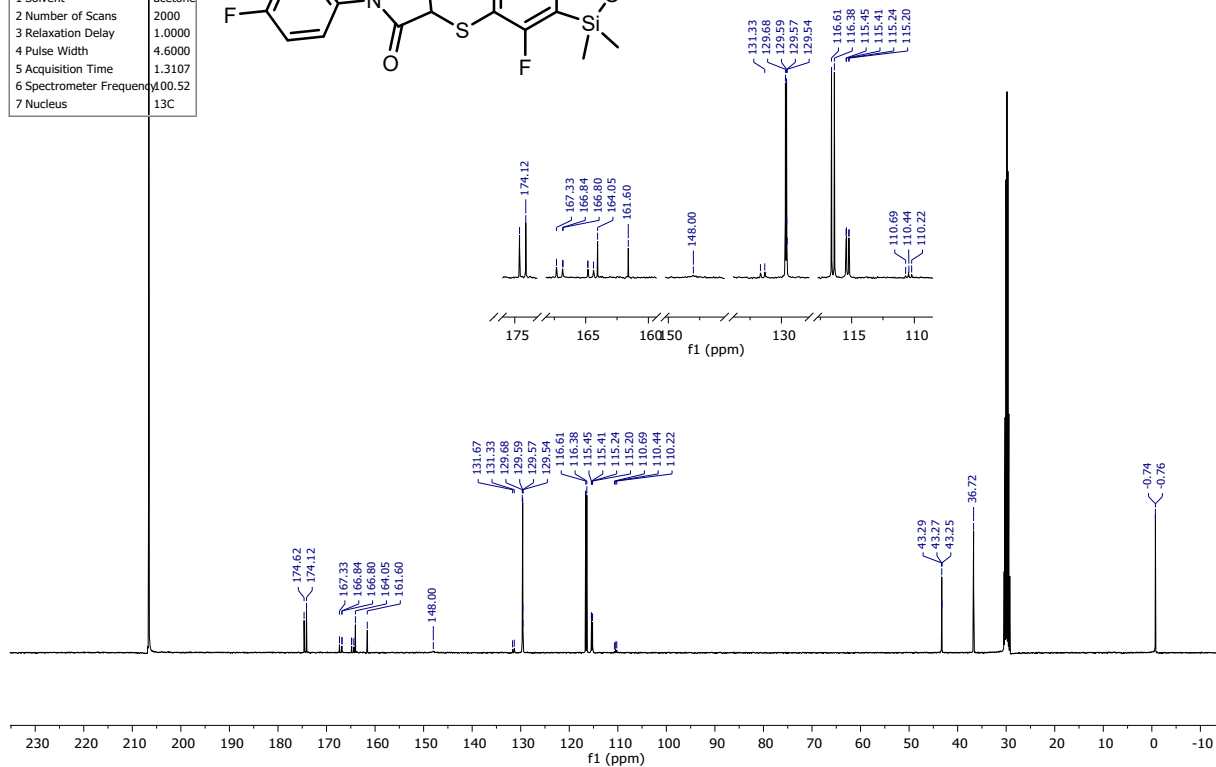

Figure S50. <sup>13</sup>C NMR spectrum (101 MHz, acetone-*d*<sub>6</sub>) of 14.

PROTON\_01

| Parameter                | Value          |
|--------------------------|----------------|
| 1 Solvent                | acetone        |
| 2 Number of Scans        | 16             |
| 3 Relaxation Delay       | 5.0000         |
| 4 Pulse Width            | 4.9000         |
| 5 Acquisition Time       | 2.5559         |
| 6 Spectrometer Frequency | 399.90         |
| 7 Nucleus                | <sup>1</sup> H |

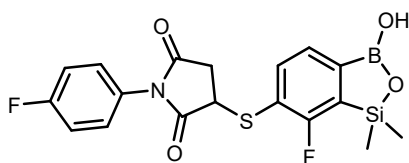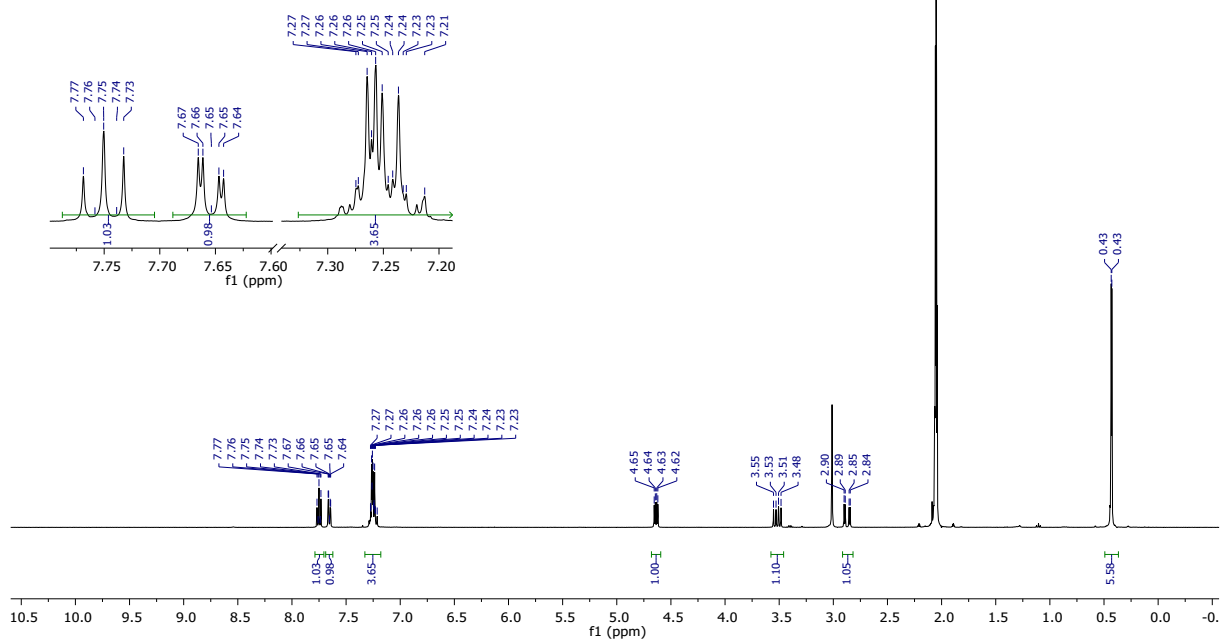

Figure S51. <sup>1</sup>H NMR spectrum (400 MHz, acetone-*d*<sub>6</sub>) of 15.

CARBON\_01

| Parameter                | Value           |
|--------------------------|-----------------|
| 1 Solvent                | acetone         |
| 2 Number of Scans        | 2000            |
| 3 Relaxation Delay       | 1.0000          |
| 4 Pulse Width            | 4.6000          |
| 5 Acquisition Time       | 1.3107          |
| 6 Spectrometer Frequency | 100.52          |
| 7 Nucleus                | <sup>13</sup> C |

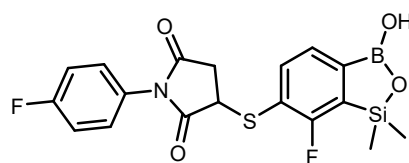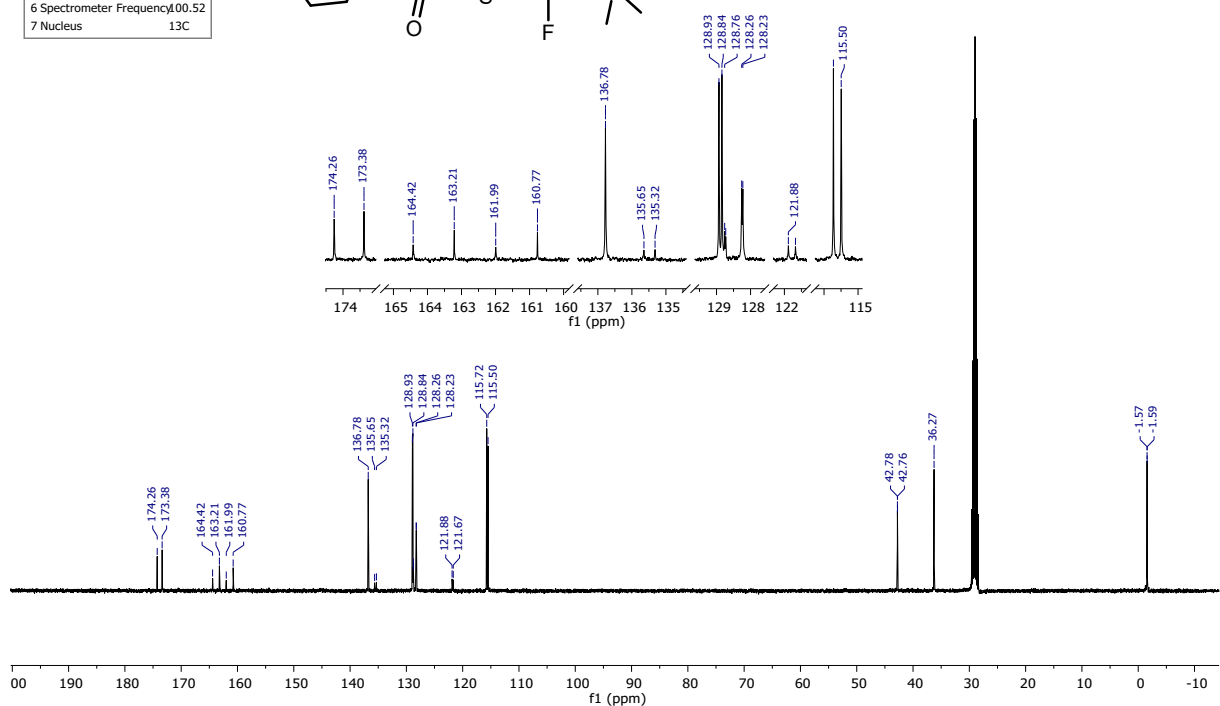

Figure S52. <sup>13</sup>C NMR spectrum (101 MHz, acetone-*d*<sub>6</sub>) of 15.

PROTON\_01

| Parameter                | Value          |
|--------------------------|----------------|
| 1 Solvent                | acetone        |
| 2 Number of Scans        | 32             |
| 3 Relaxation Delay       | 5.0000         |
| 4 Pulse Width            | 4.3000         |
| 5 Acquisition Time       | 2.5559         |
| 6 Spectrometer Frequency | 399.72         |
| 7 Nucleus                | <sup>1</sup> H |

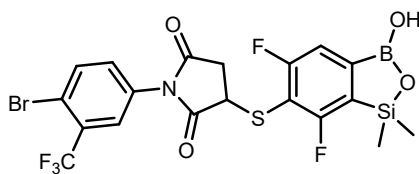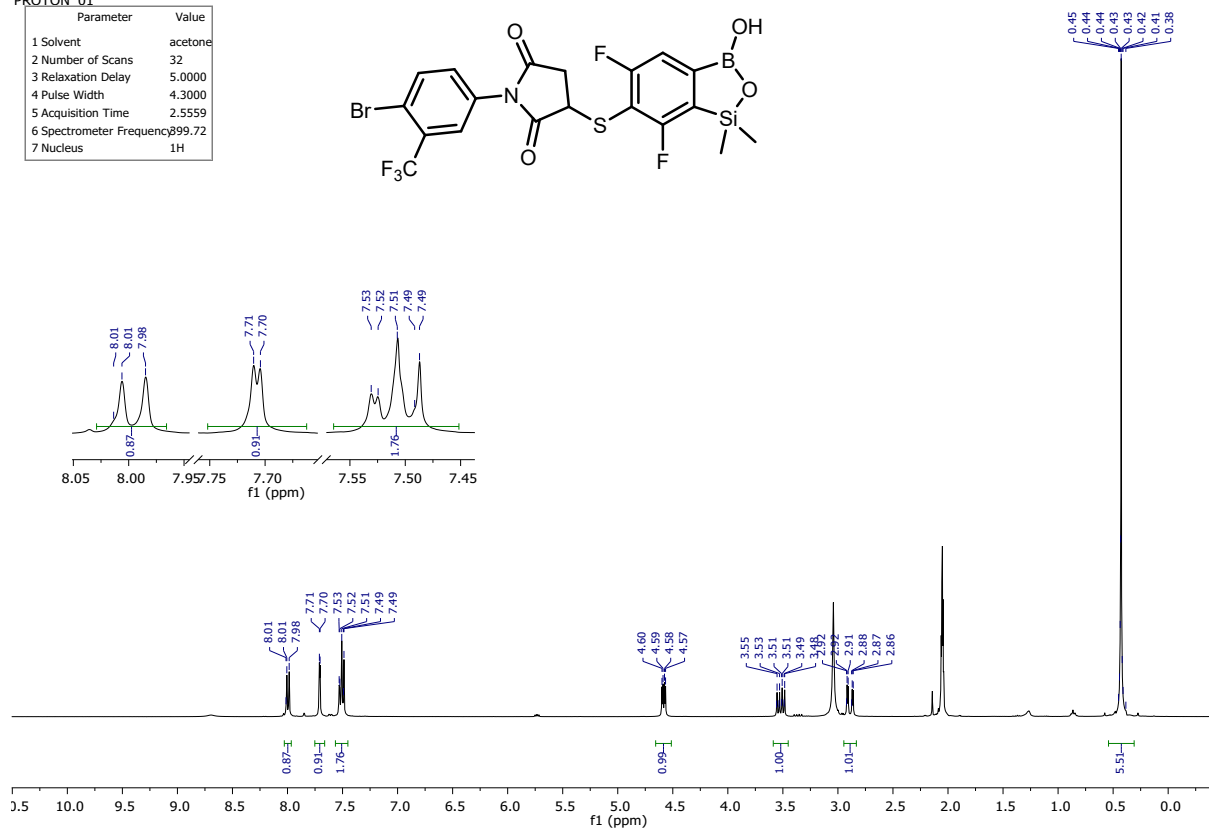

Figure S53. <sup>1</sup>H NMR spectrum (400 MHz, acetone-*d*<sub>6</sub>) of 16.

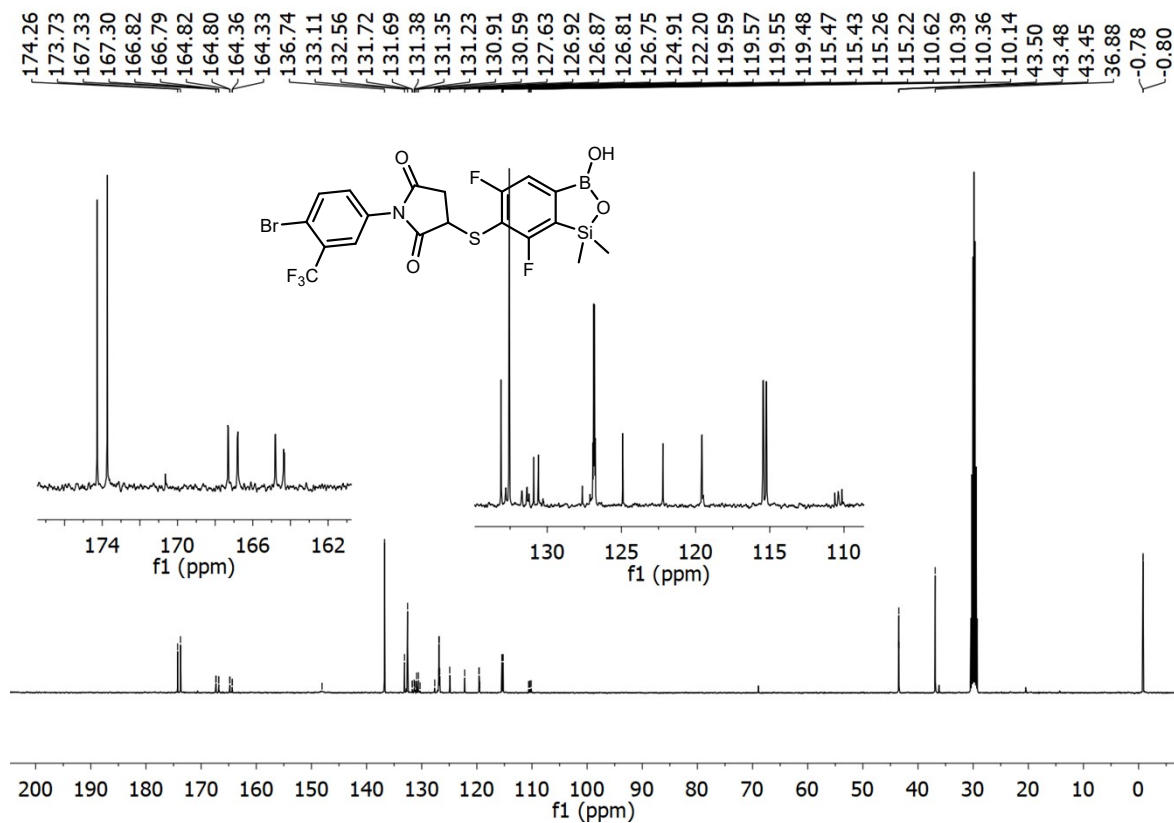

Figure S54. <sup>13</sup>C NMR spectrum (101 MHz, acetone-*d*<sub>6</sub>) of 16.





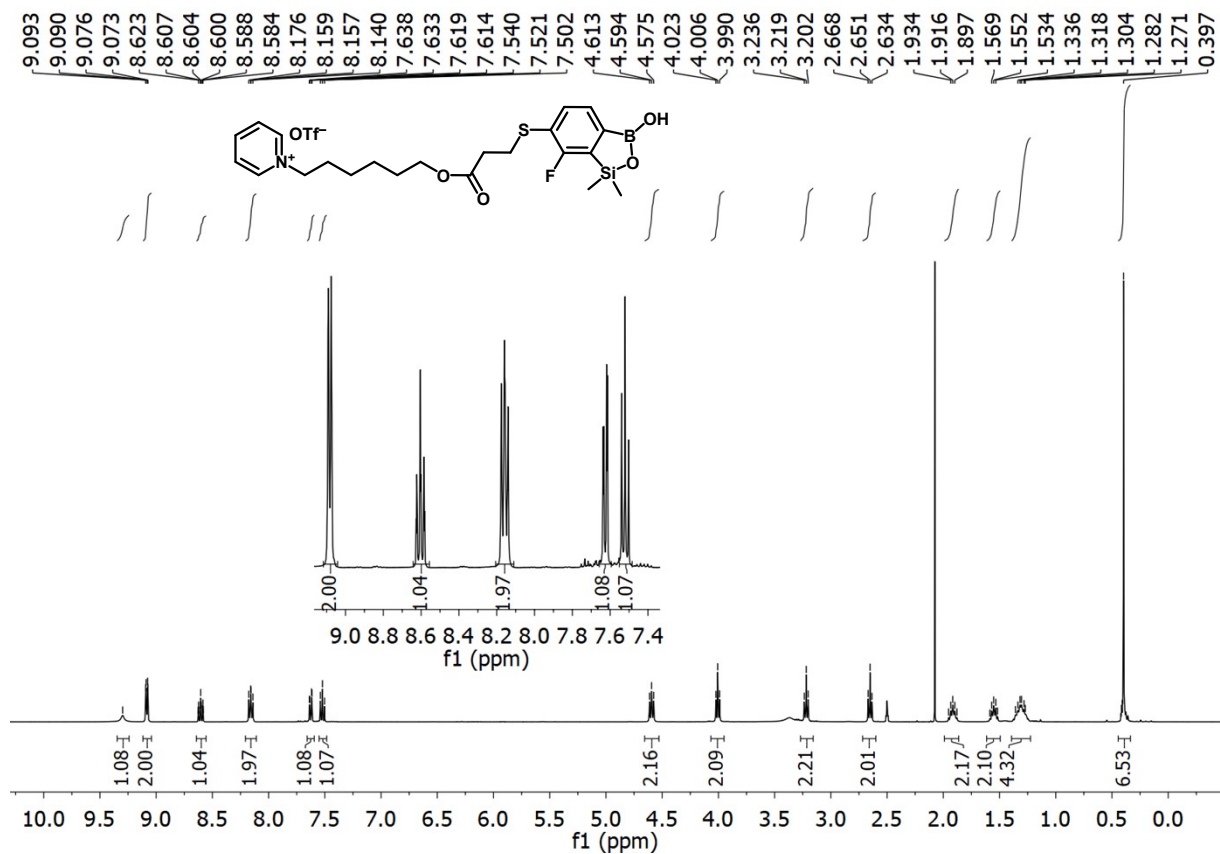

**Figure S59.**  $^1\text{H}$  NMR spectrum (400 MHz,  $\text{DMSO-}d_6$ ) of **19**. The signal of residual solvent (acetone) is marked with an asterisk.

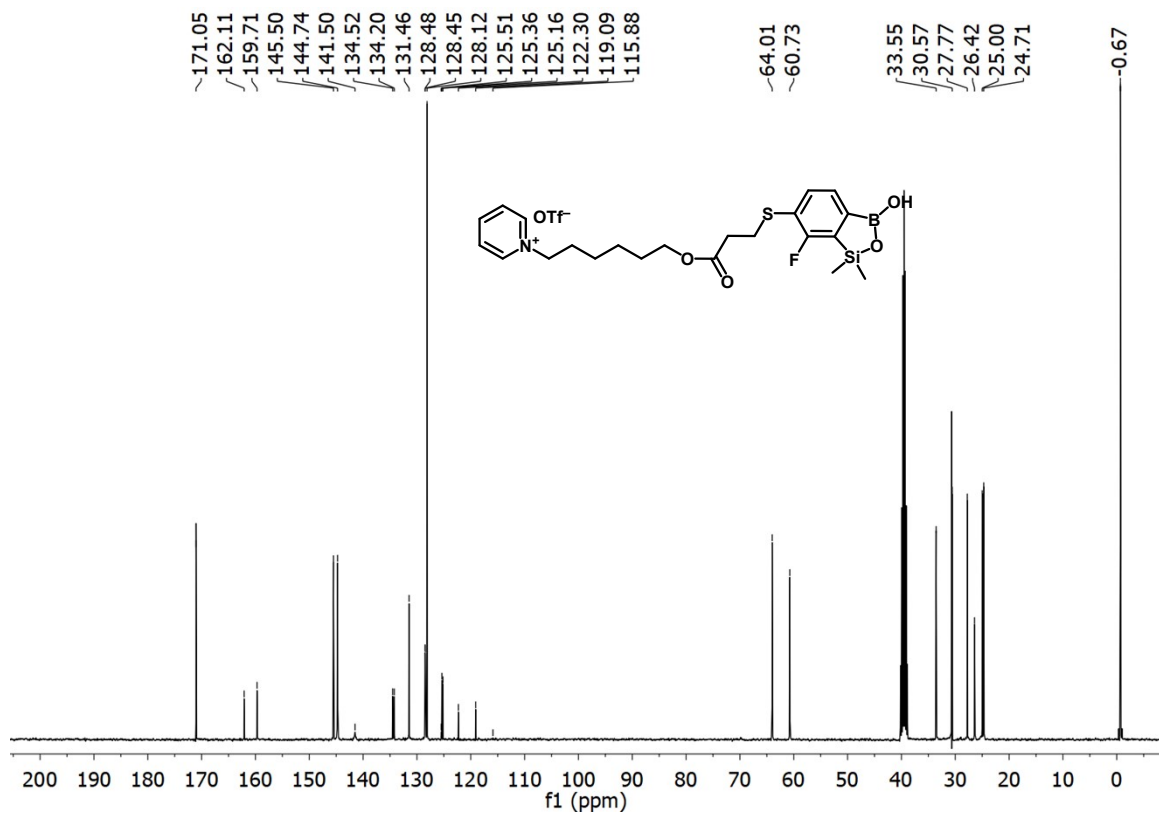

**Figure S60.**  $^{13}\text{C}$  NMR spectrum (101 MHz,  $\text{DMSO-}d_6$ ) of **19**.

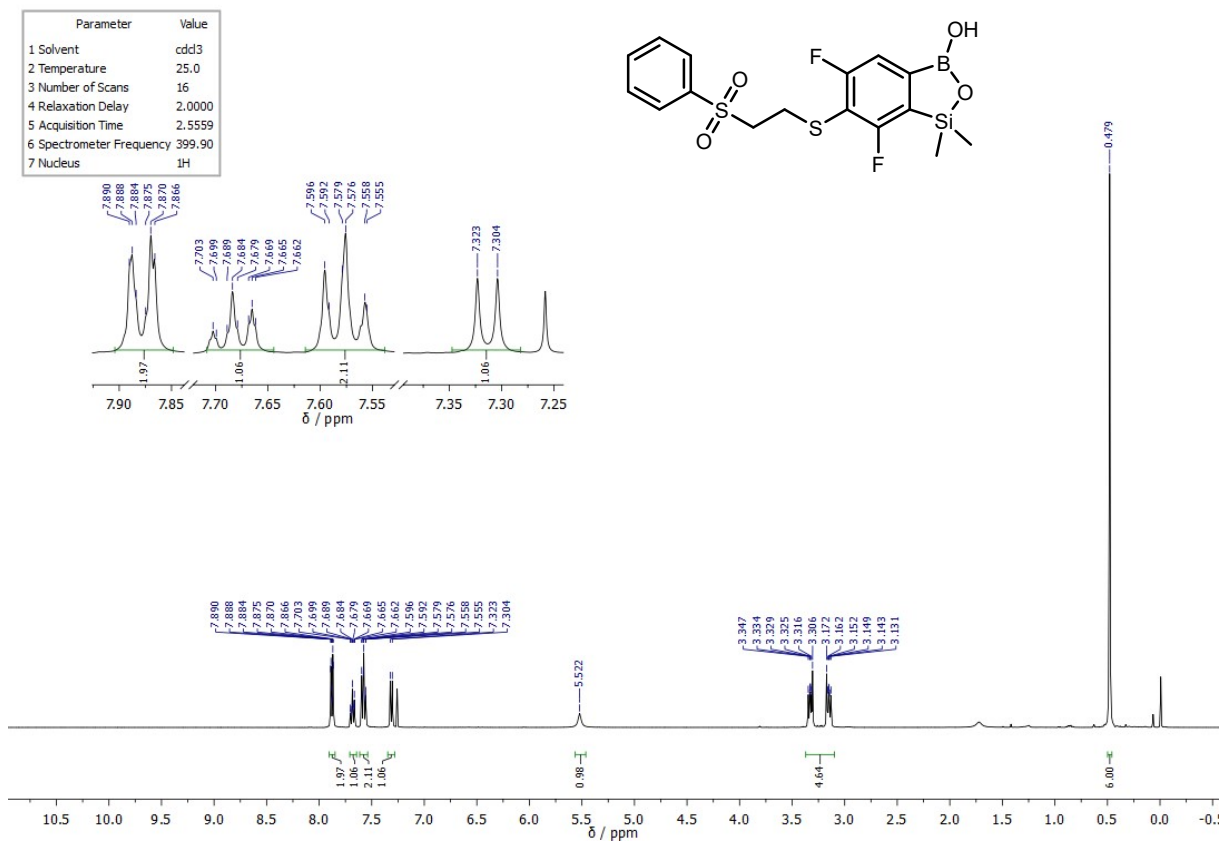

**Figure S61.** <sup>1</sup>H NMR spectrum (400 MHz, CDCl<sub>3</sub>) of **20**.

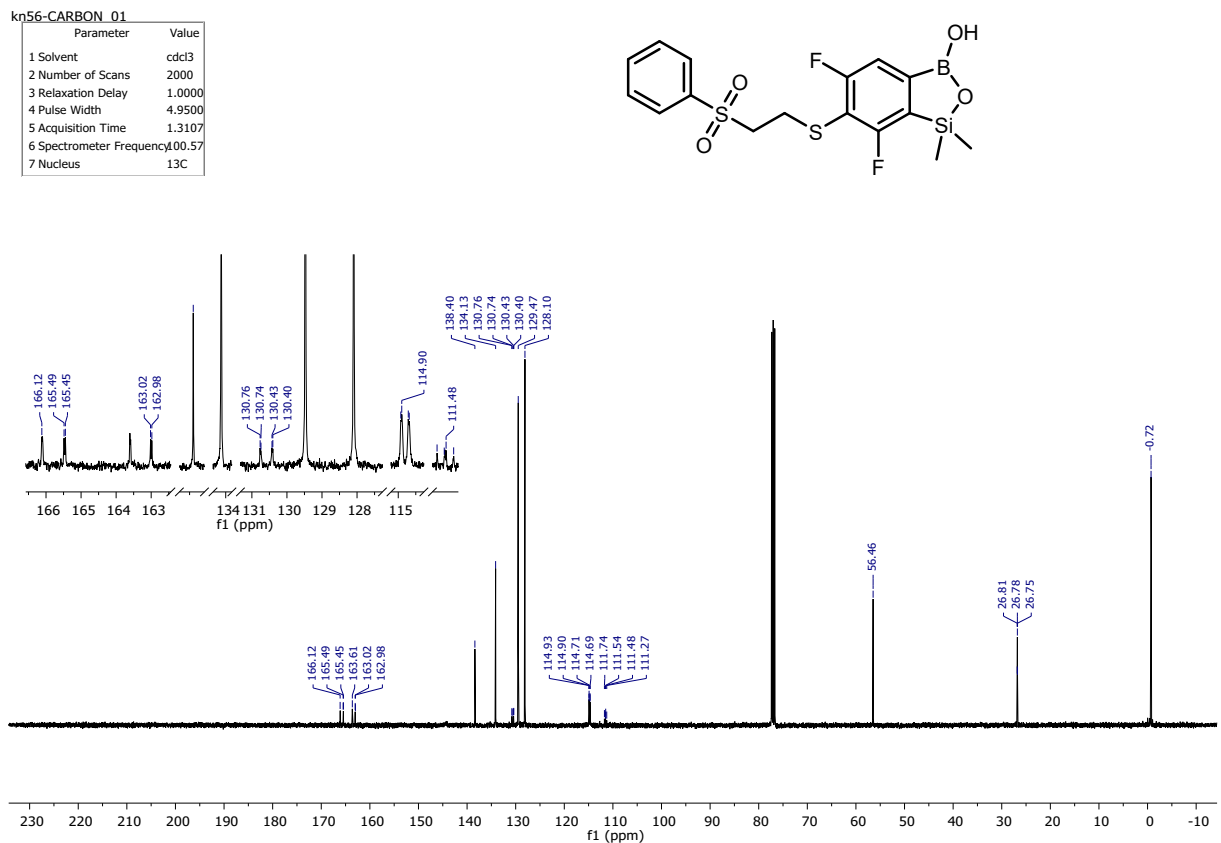

**Figure S62.** <sup>13</sup>C NMR spectrum (101 MHz, CDCl<sub>3</sub>) of **20**.

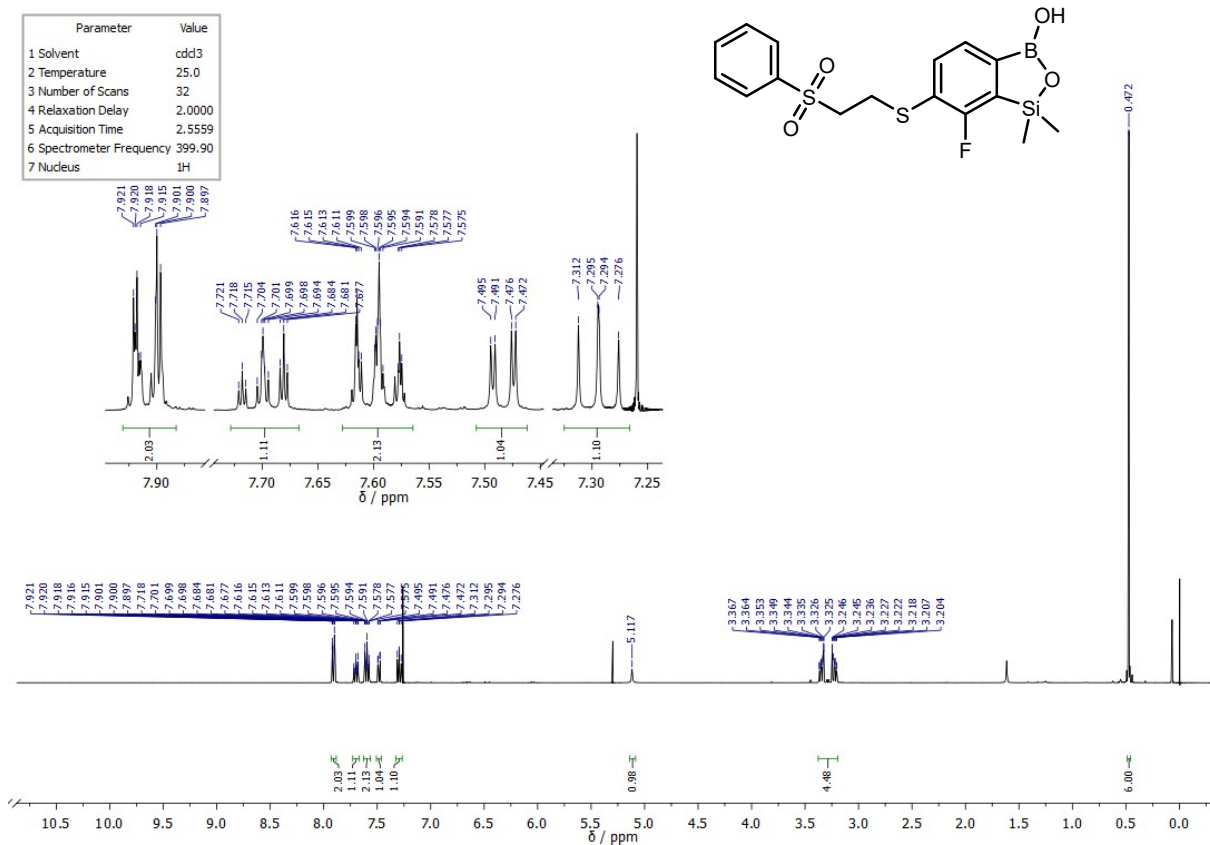

**Figure S63.** <sup>1</sup>H NMR spectrum (400 MHz, CDCl<sub>3</sub>) of **21**.

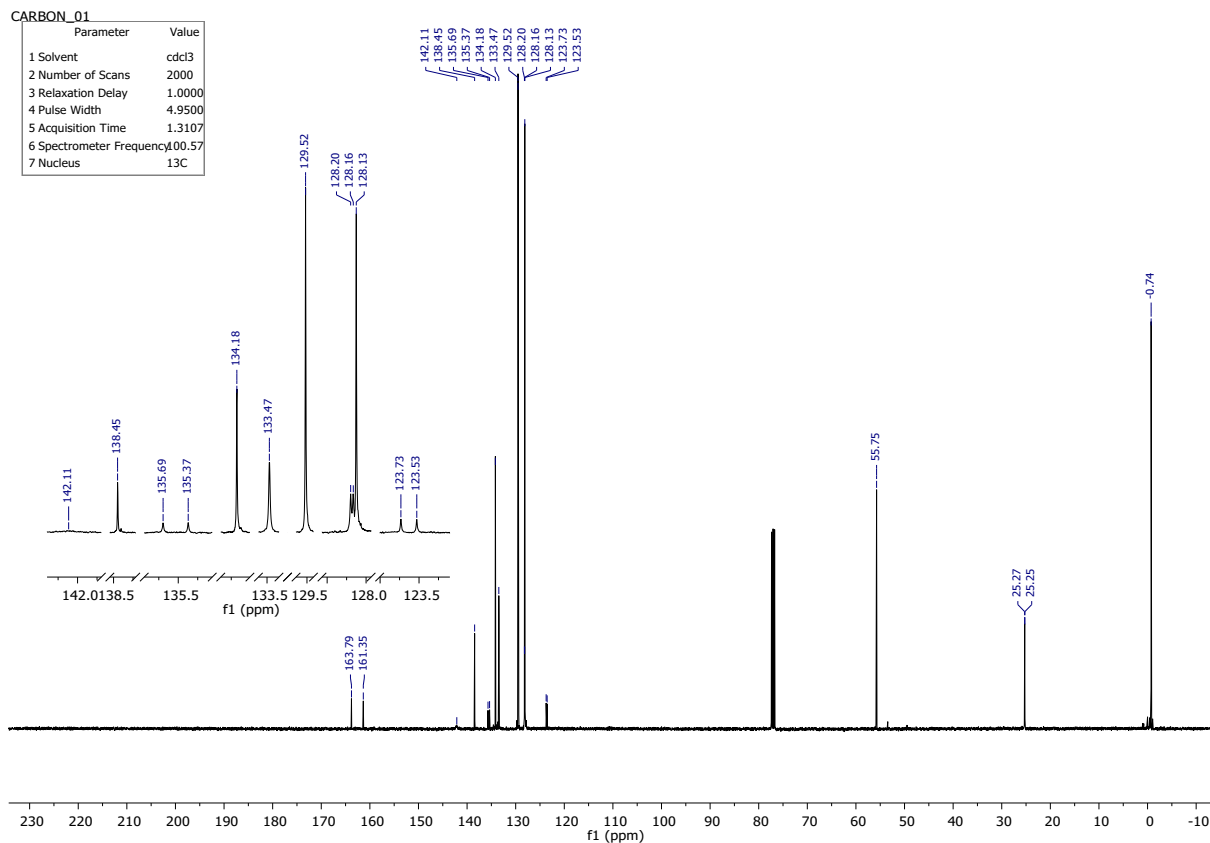

**Figure S64.** <sup>13</sup>C NMR spectrum (101 MHz, CDCl<sub>3</sub>) of **21**.



JMK14-PROTON\_01

| Parameter                | Value          |
|--------------------------|----------------|
| 1 Solvent                | acetone        |
| 2 Number of Scans        | 32             |
| 3 Relaxation Delay       | 2.0000         |
| 4 Pulse Width            | 5.0000         |
| 5 Acquisition Time       | 2.5559         |
| 6 Spectrometer Frequency | 399.90         |
| 7 Nucleus                | <sup>1</sup> H |

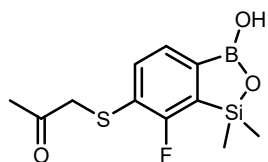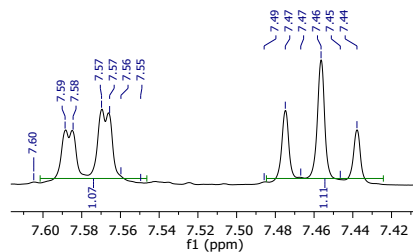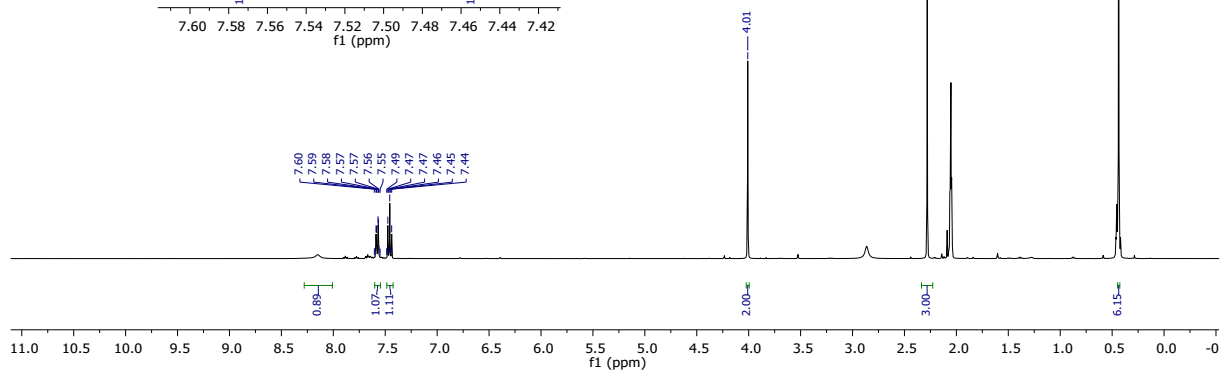

Figure S65. <sup>1</sup>H NMR spectrum (400 MHz, acetone-*d*<sub>6</sub>) of **22**.

JMK14-CARBON\_01

| Parameter                | Value           |
|--------------------------|-----------------|
| 1 Solvent                | acetone         |
| 2 Number of Scans        | 2000            |
| 3 Relaxation Delay       | 1.0000          |
| 4 Pulse Width            | 4.9500          |
| 5 Acquisition Time       | 1.3107          |
| 6 Spectrometer Frequency | 100.57          |
| 7 Nucleus                | <sup>13</sup> C |

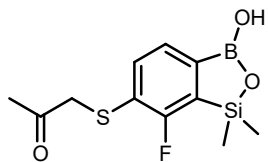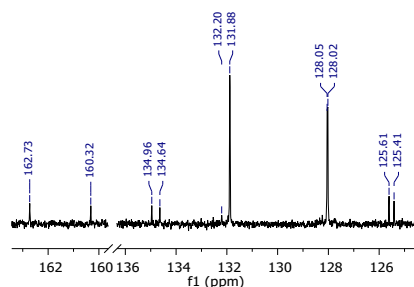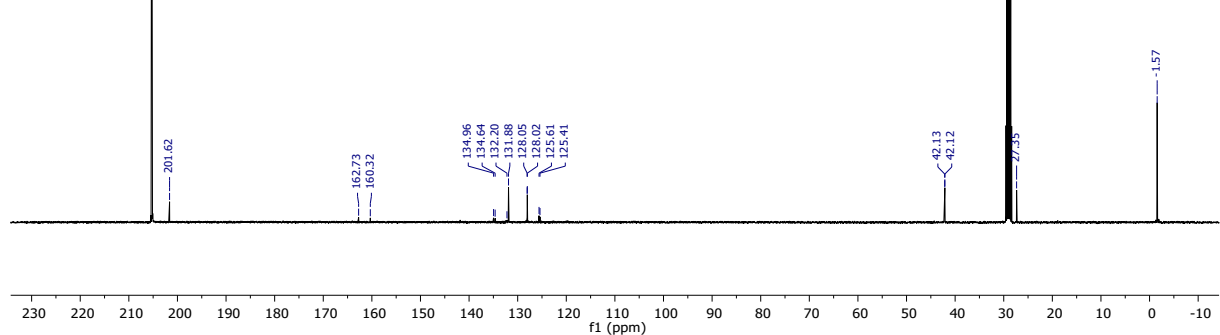

Figure S66. <sup>13</sup>C NMR spectrum (101 MHz, acetone-*d*<sub>6</sub>) of **22** in acetone-*d*<sub>6</sub>.

JMK15-PROTON\_01

| Parameter                | Value          |
|--------------------------|----------------|
| 1 Solvent                | acetone        |
| 2 Number of Scans        | 32             |
| 3 Relaxation Delay       | 2.0000         |
| 4 Pulse Width            | 5.0000         |
| 5 Acquisition Time       | 2.5559         |
| 6 Spectrometer Frequency | 399.90         |
| 7 Nucleus                | <sup>1</sup> H |

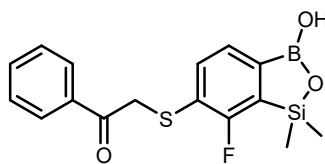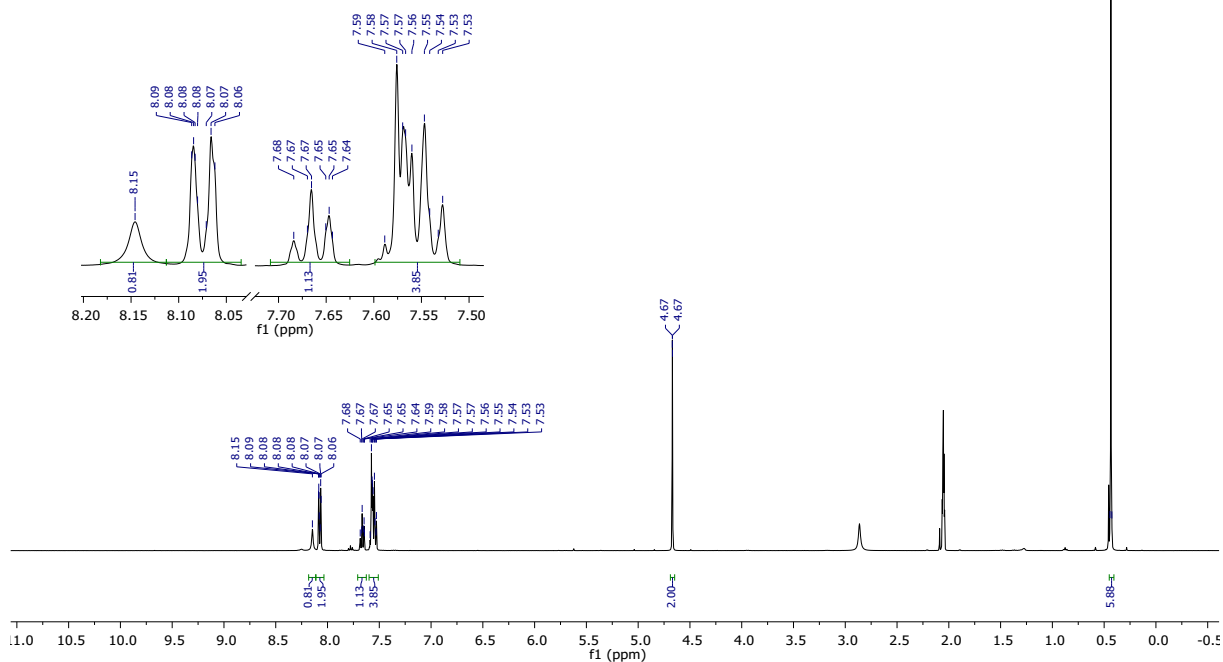

Figure S67. <sup>1</sup>H NMR spectrum (400 MHz, acetone-*d*<sub>6</sub>) of 23.

JMK15-CARBON\_01

| Parameter                | Value           |
|--------------------------|-----------------|
| 1 Solvent                | acetone         |
| 2 Number of Scans        | 2000            |
| 3 Relaxation Delay       | 1.0000          |
| 4 Pulse Width            | 4.9500          |
| 5 Acquisition Time       | 1.3107          |
| 6 Spectrometer Frequency | 100.57          |
| 7 Nucleus                | <sup>13</sup> C |

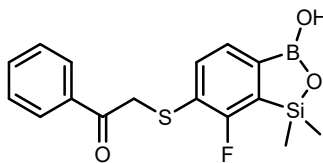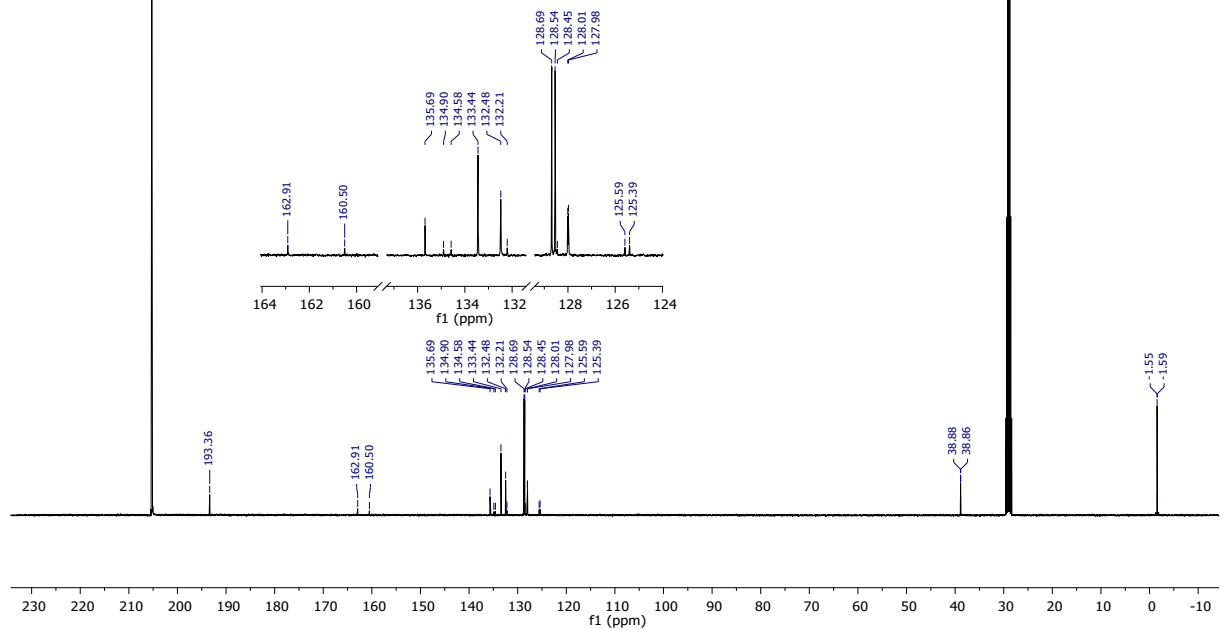

Figure S68. <sup>13</sup>C NMR spectrum (101 MHz, acetone-*d*<sub>6</sub>) of 23.

PROTON\_01

| Parameter                | Value   |
|--------------------------|---------|
| 1 Solvent                | cdcl3   |
| 2 Number of Scans        | 16      |
| 3 Relaxation Delay       | 1.0000  |
| 4 Pulse Width            | 4.9000  |
| 5 Acquisition Time       | 2.5559  |
| 6 Spectrometer Frequency | 399.990 |
| 7 Nucleus                | 1H      |

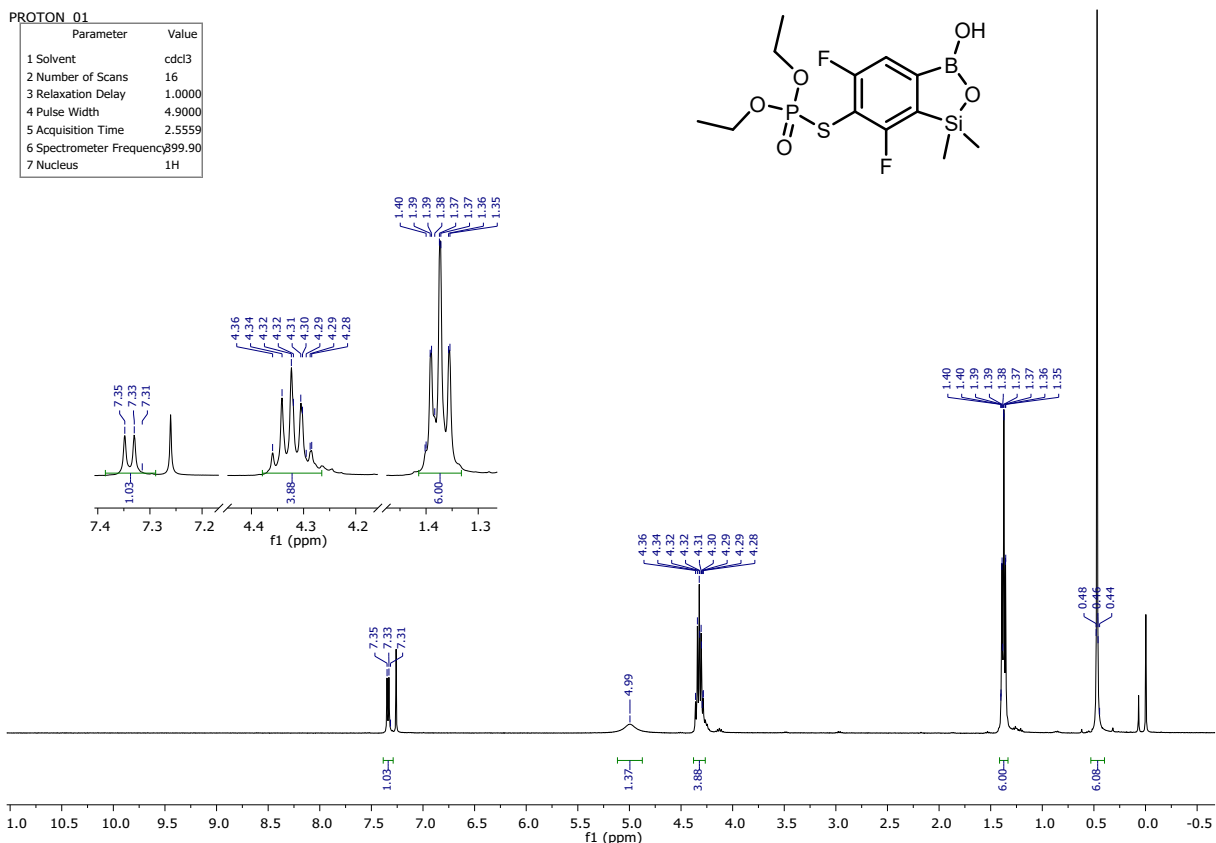

Figure S69. <sup>1</sup>H NMR spectrum (400 MHz, CDCl<sub>3</sub>) of 24.

CARBON\_01

| Parameter                | Value  |
|--------------------------|--------|
| 1 Solvent                | cdcl3  |
| 2 Number of Scans        | 2000   |
| 3 Relaxation Delay       | 1.0000 |
| 4 Pulse Width            | 4.9500 |
| 5 Acquisition Time       | 1.3107 |
| 6 Spectrometer Frequency | 100.57 |
| 7 Nucleus                | 13C    |

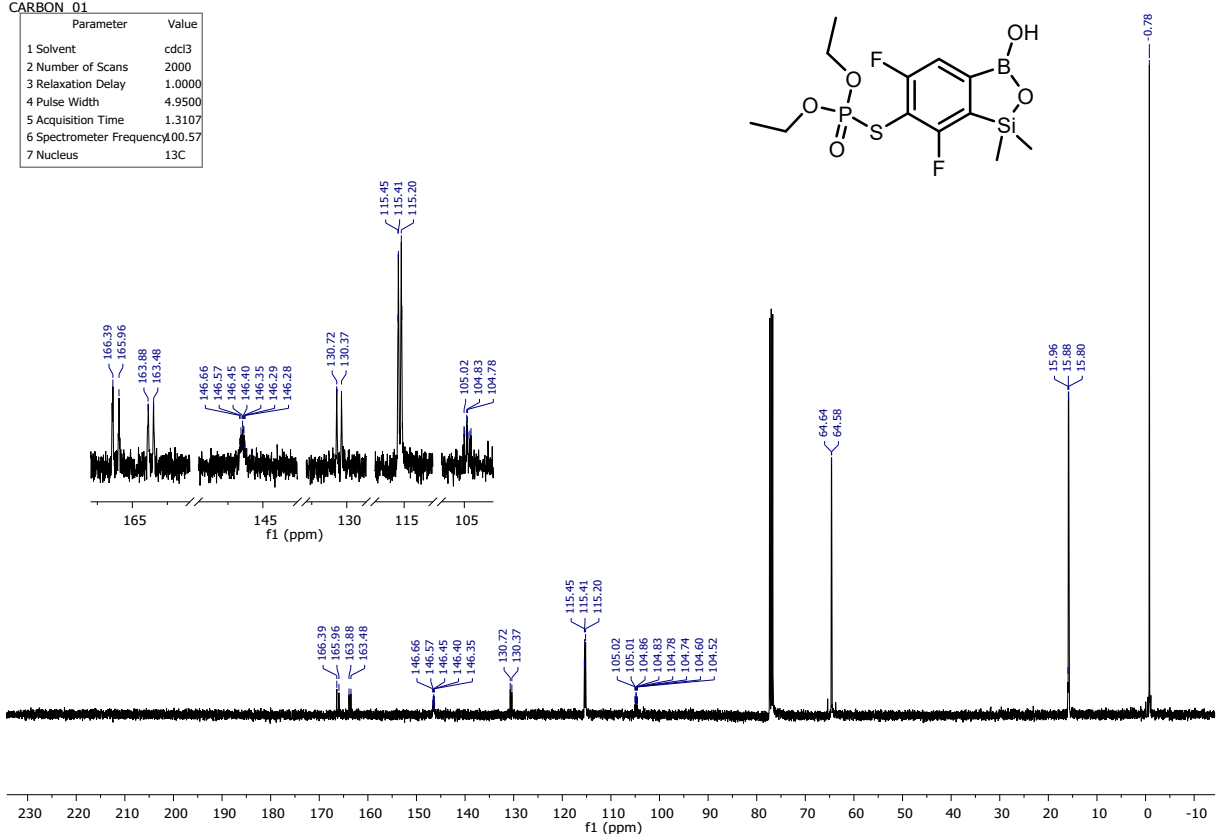

Figure S70. <sup>13</sup>C NMR spectrum (101 MHz, CDCl<sub>3</sub>) of 24.

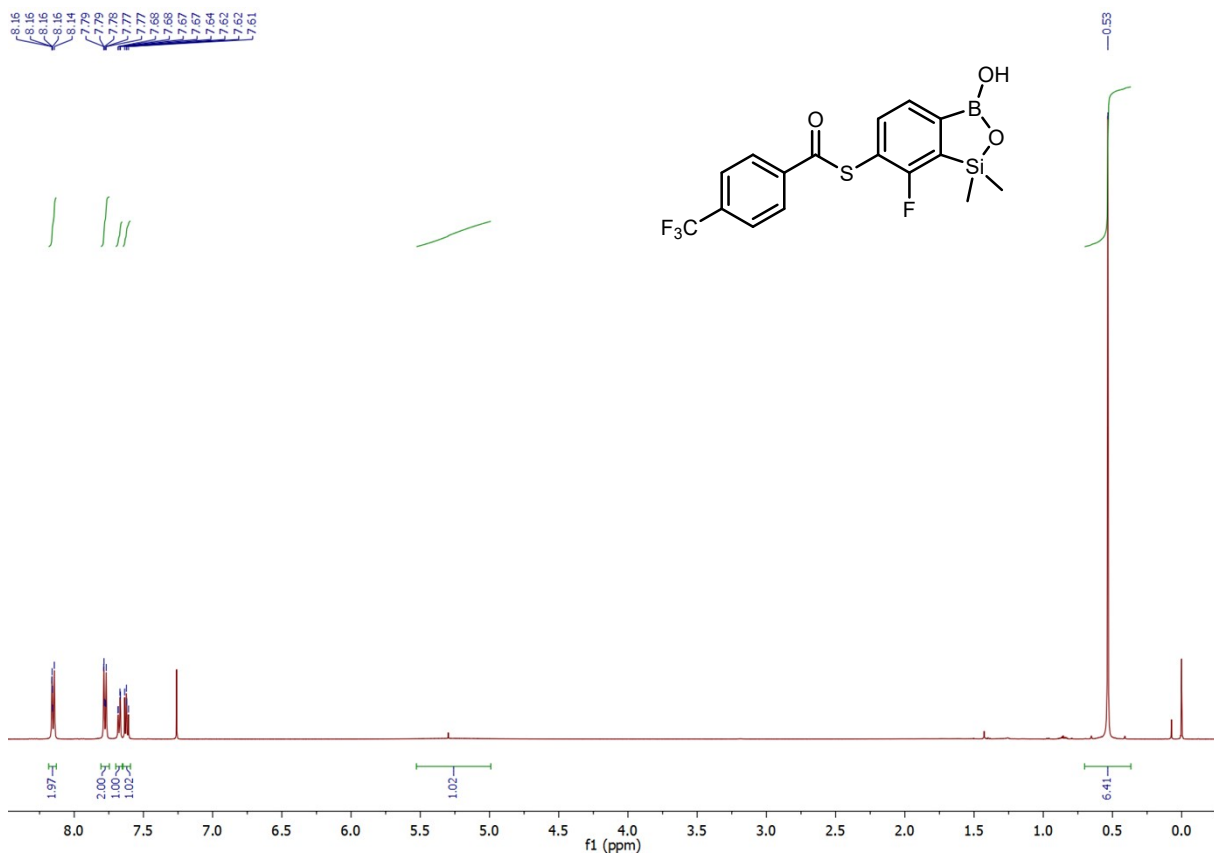

**Figure S71.**  $^1\text{H}$  NMR spectrum (500 MHz,  $\text{CDCl}_3$ ) of **25**.

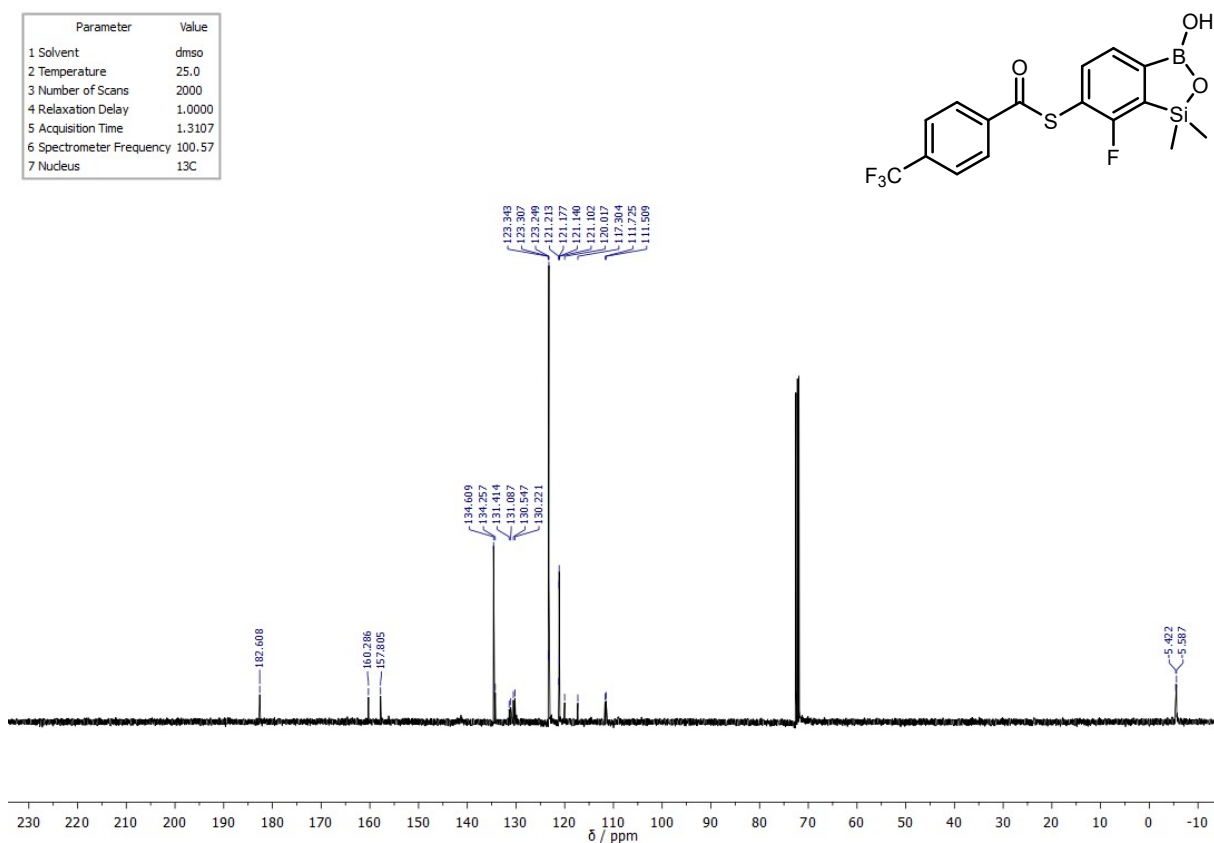

**Figure S72.**  $^{13}\text{C}$  NMR (101 MHz,  $\text{DMSO}-d_6$ ) spectrum of **25**.

PROTON\_01

| Parameter                | Value  |
|--------------------------|--------|
| 1 Solvent                | cdcl3  |
| 2 Number of Scans        | 16     |
| 3 Relaxation Delay       | 5.0000 |
| 4 Pulse Width            | 4.9000 |
| 5 Acquisition Time       | 2.5559 |
| 6 Spectrometer Frequency | 399.90 |
| 7 Nucleus                | 1H     |

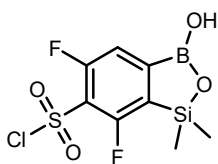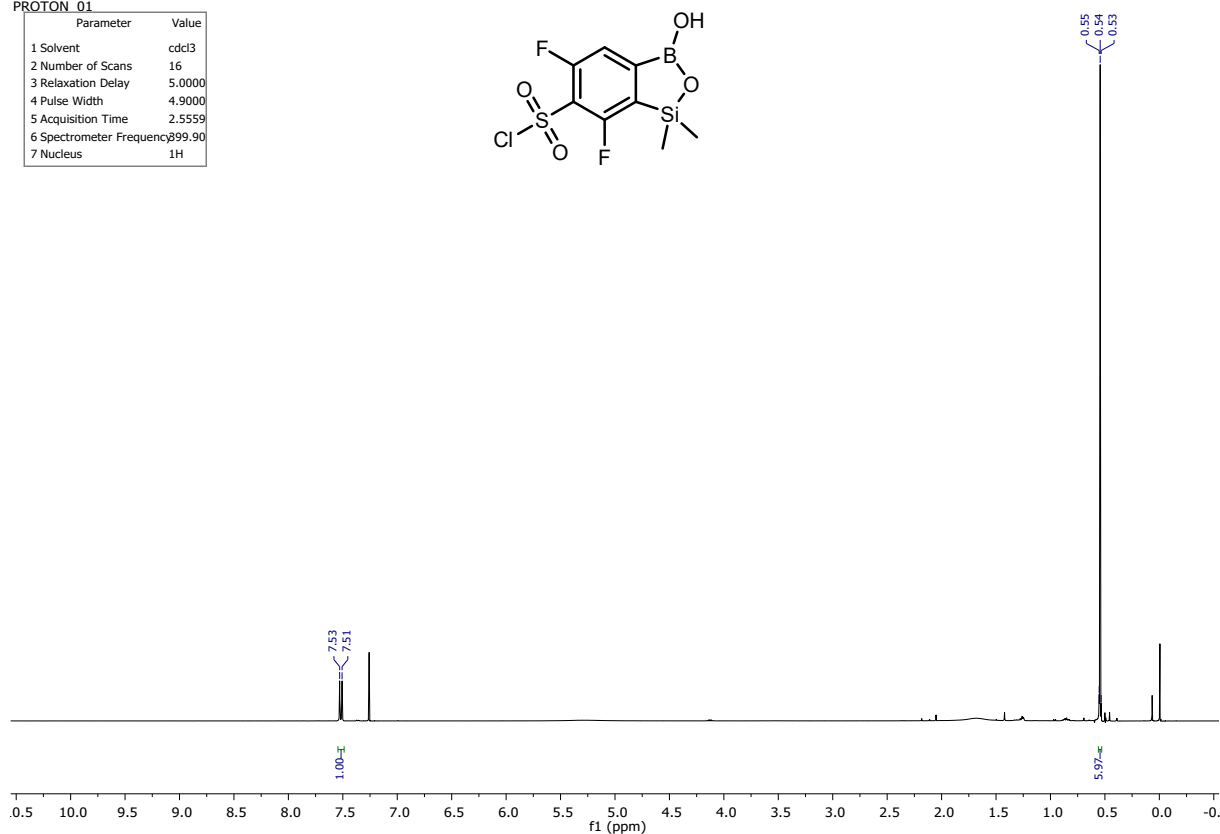

Figure S73. <sup>1</sup>H NMR spectrum (400 MHz, CDCl<sub>3</sub>) of 26.

CARBON\_01

| Parameter                | Value  |
|--------------------------|--------|
| 1 Solvent                | cdcl3  |
| 2 Number of Scans        | 1000   |
| 3 Relaxation Delay       | 1.0000 |
| 4 Pulse Width            | 4.9500 |
| 5 Acquisition Time       | 1.3107 |
| 6 Spectrometer Frequency | 100.57 |
| 7 Nucleus                | 13C    |

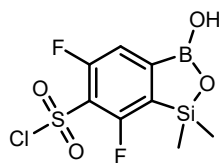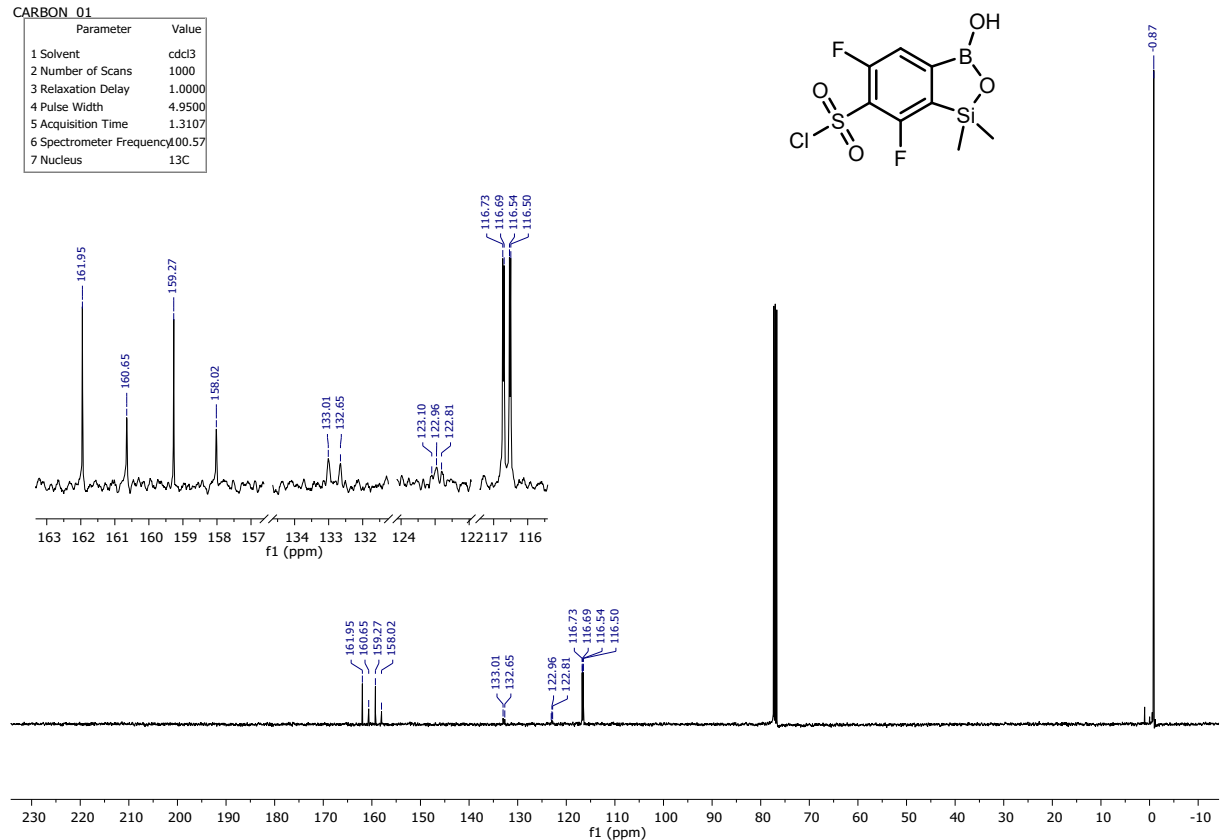

Figure S74. <sup>13</sup>C NMR spectrum (101 MHz, CDCl<sub>3</sub>) of 26.

PROTON\_01

| Parameter                | Value   |
|--------------------------|---------|
| 1 Solvent                | dmsd    |
| 2 Number of Scans        | 16      |
| 3 Relaxation Delay       | 1.0000  |
| 4 Pulse Width            | 4.9000  |
| 5 Acquisition Time       | 2.5559  |
| 6 Spectrometer Frequency | 399.990 |
| 7 Nucleus                | 1H      |

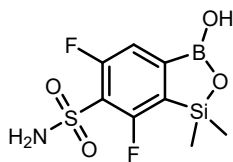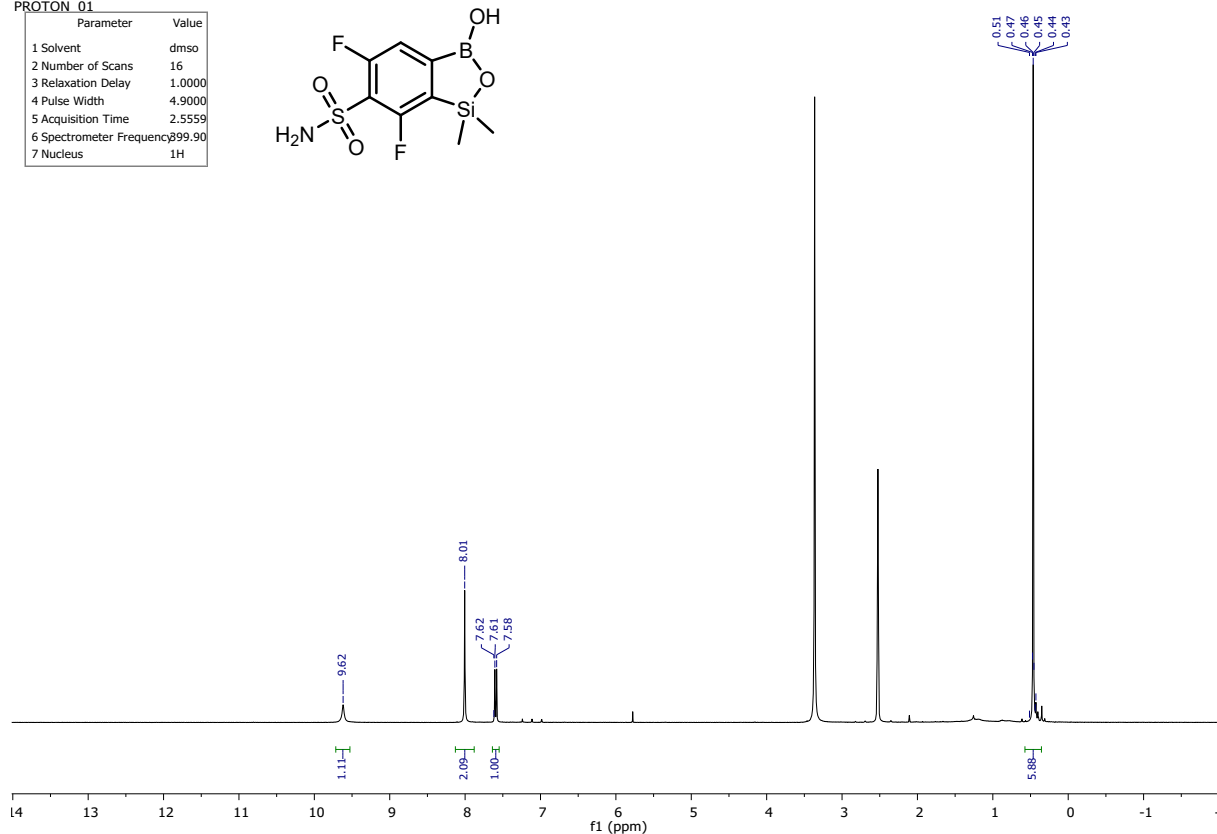

Figure S75.  $^1\text{H}$  NMR spectrum (400 MHz,  $\text{DMSO-}d_6$ ) of 27.

CARBON\_07

| Parameter                | Value           |
|--------------------------|-----------------|
| 1 Solvent                | dmsd            |
| 2 Number of Scans        | 2000            |
| 3 Relaxation Delay       | 1.0000          |
| 4 Pulse Width            | 4.9500          |
| 5 Acquisition Time       | 1.3107          |
| 6 Spectrometer Frequency | 100.57          |
| 7 Nucleus                | $^{13}\text{C}$ |

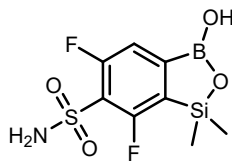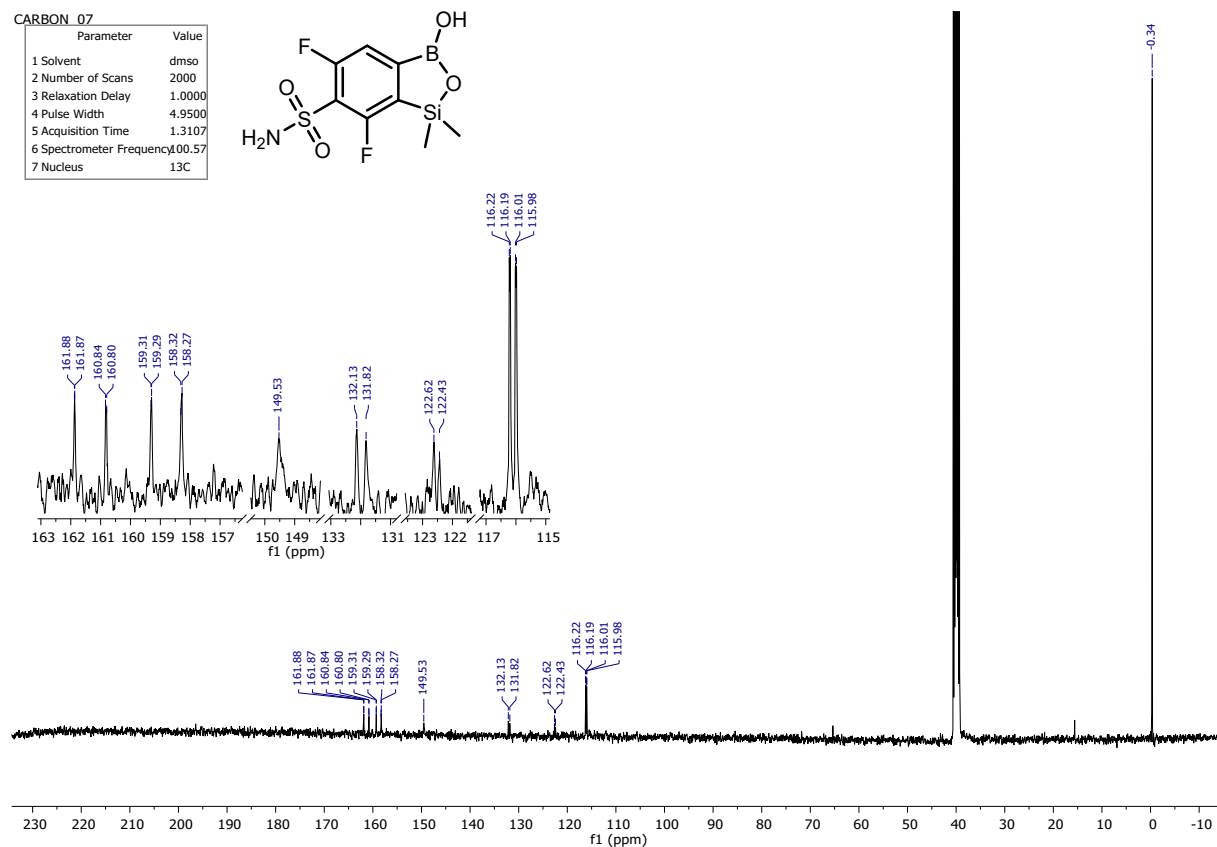

Figure S76.  $^{13}\text{C}$  NMR spectrum (400 MHz,  $\text{DMSO-}d_6$ ) of 27.

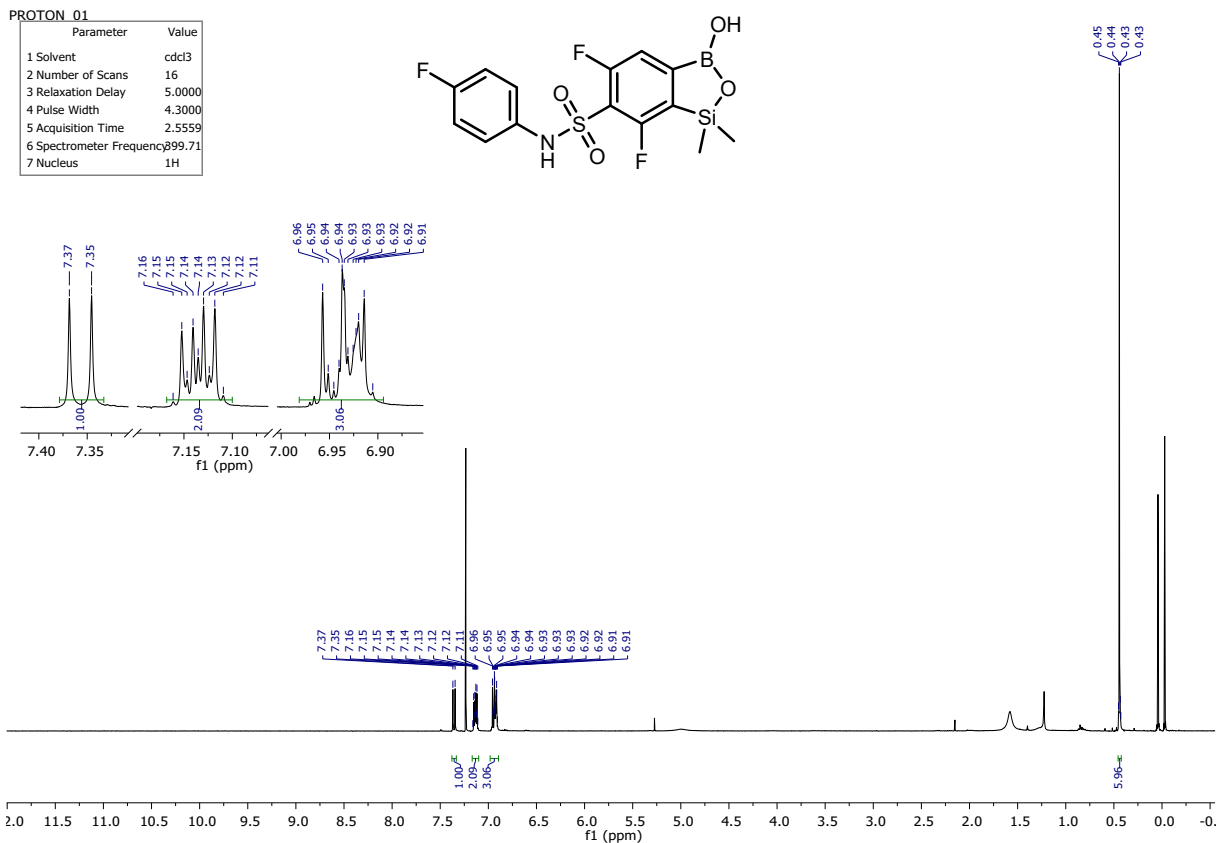

**Figure S77.** <sup>1</sup>H NMR spectrum (400 MHz, CDCl<sub>3</sub>) of **28**.

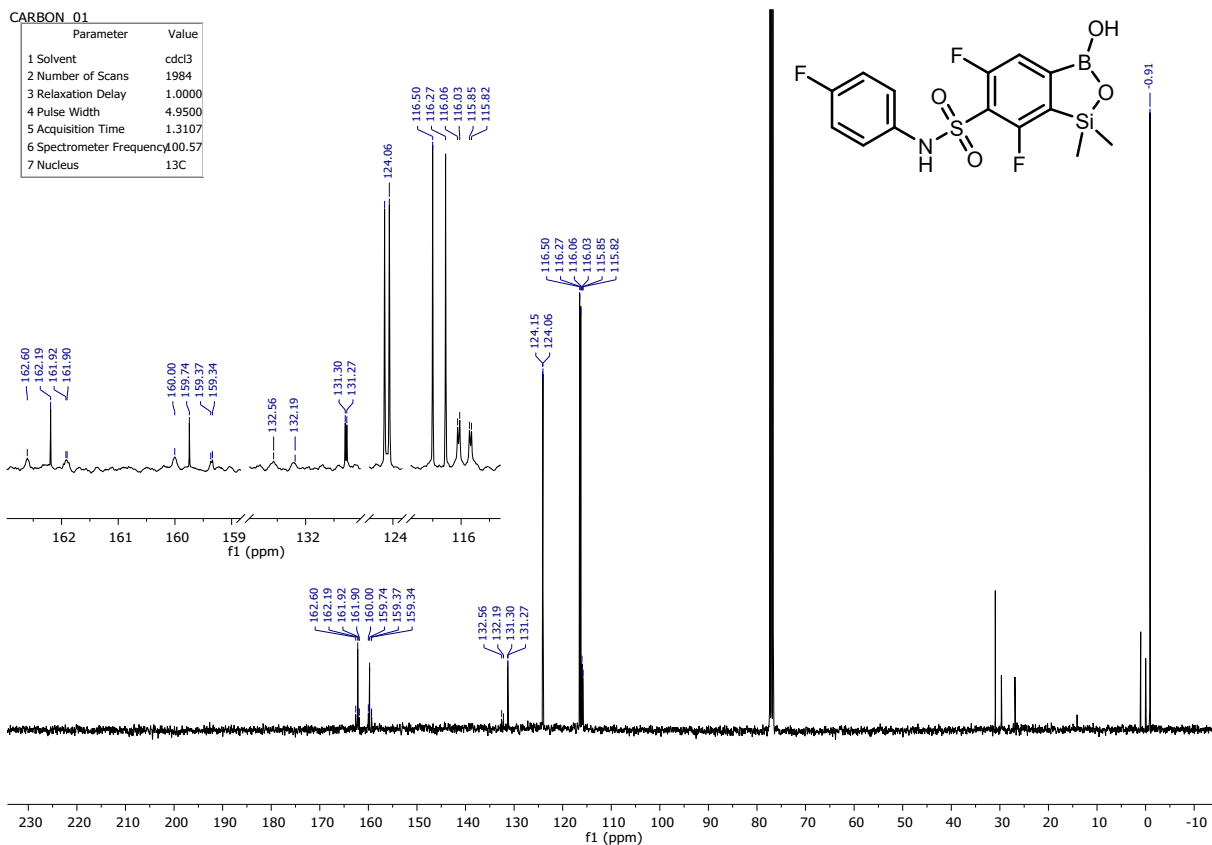

**Figure S78.** <sup>13</sup>C NMR spectrum (101 MHz, CDCl<sub>3</sub>) of **28**.

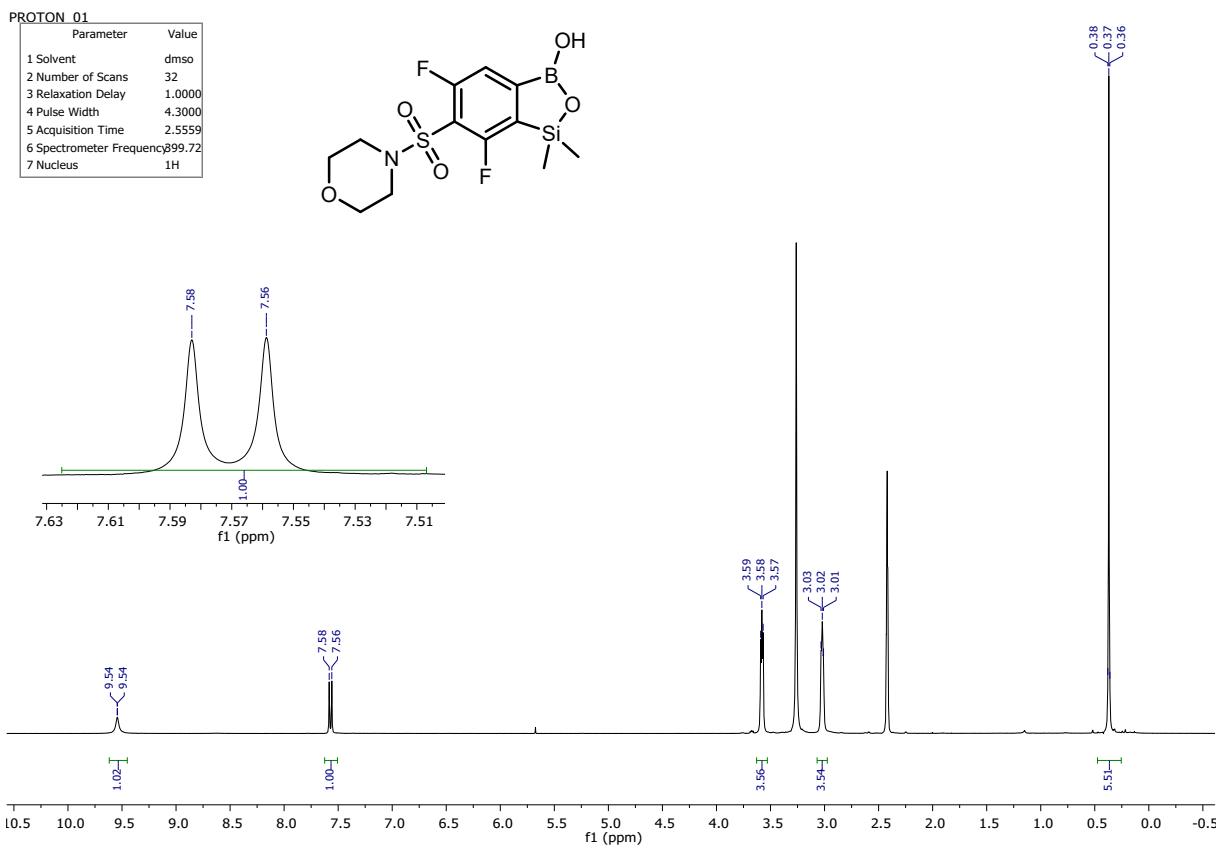

**Figure S79.** <sup>1</sup>H NMR spectrum (400 MHz, DMSO-*d*<sub>6</sub>) of **29**.

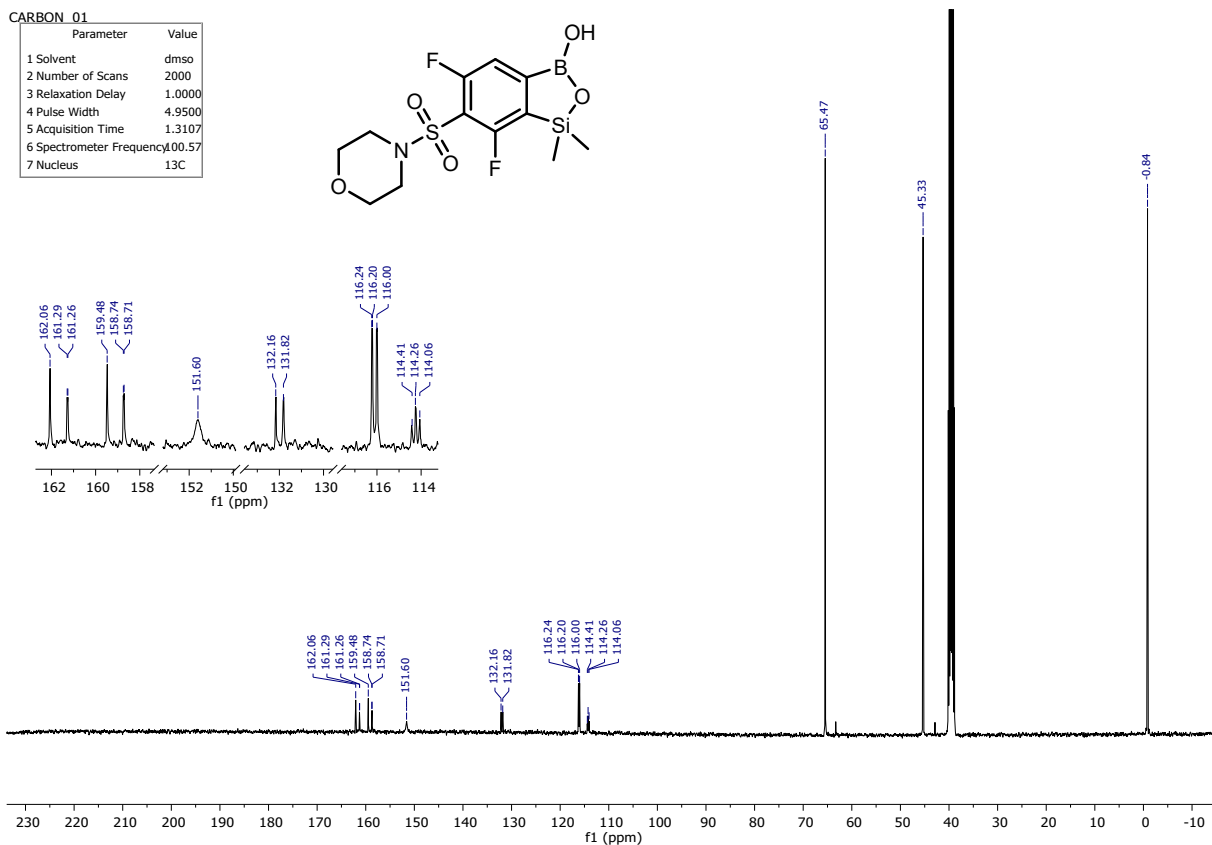

**Figure S80.** <sup>13</sup>C NMR spectrum (101 MHz, DMSO-*d*<sub>6</sub>) of **29**.



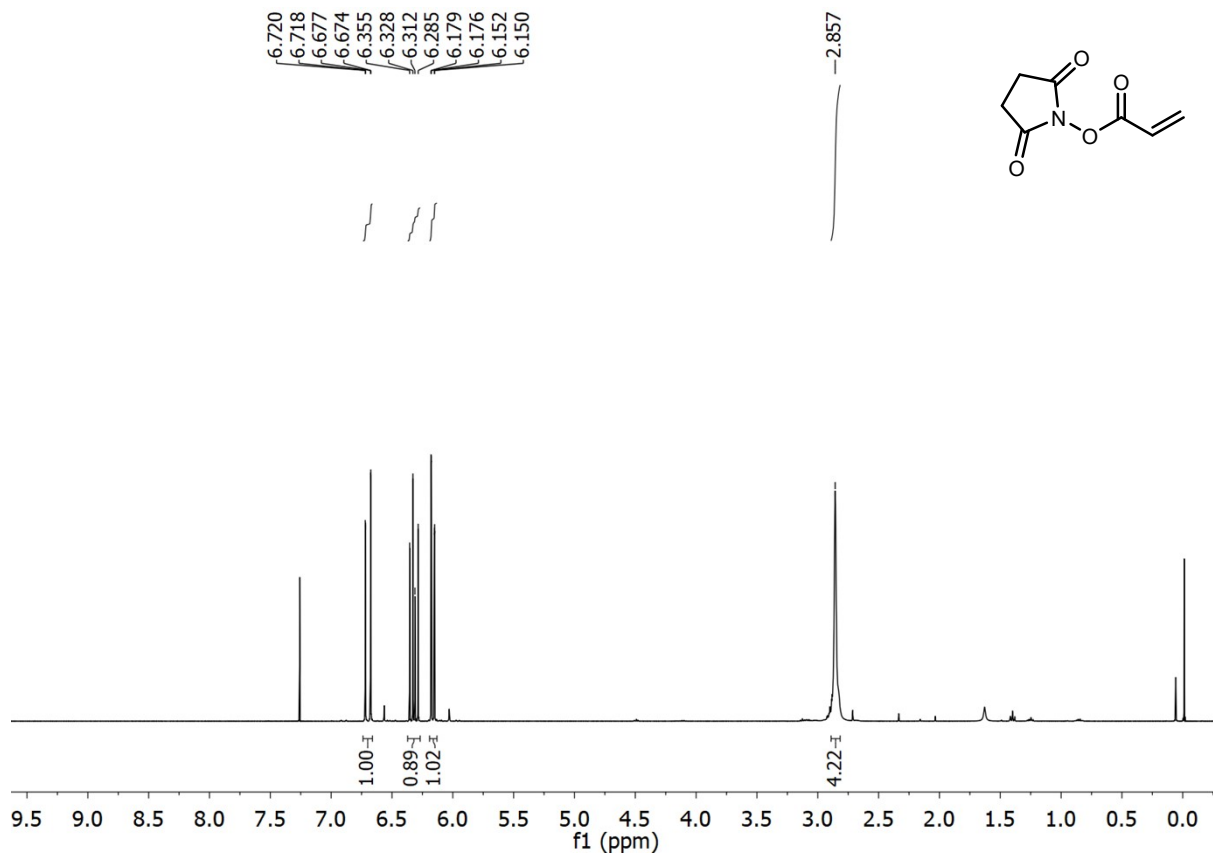

Figure S81.  $^1\text{H}$  NMR spectrum (400 MHz,  $\text{CDCl}_3$ ) of S1.

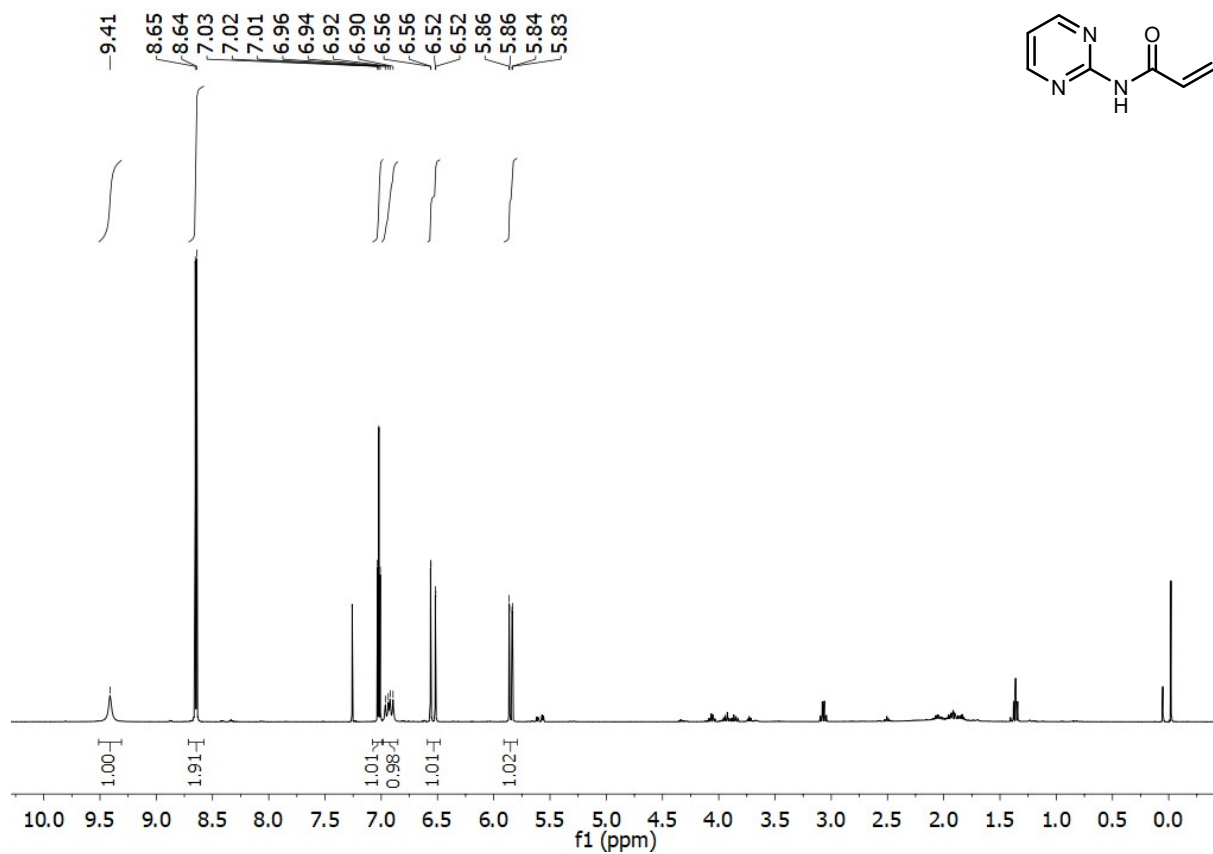

Figure S82.  $^1\text{H}$  NMR spectrum (400 MHz,  $\text{CDCl}_3$ ) of S2.

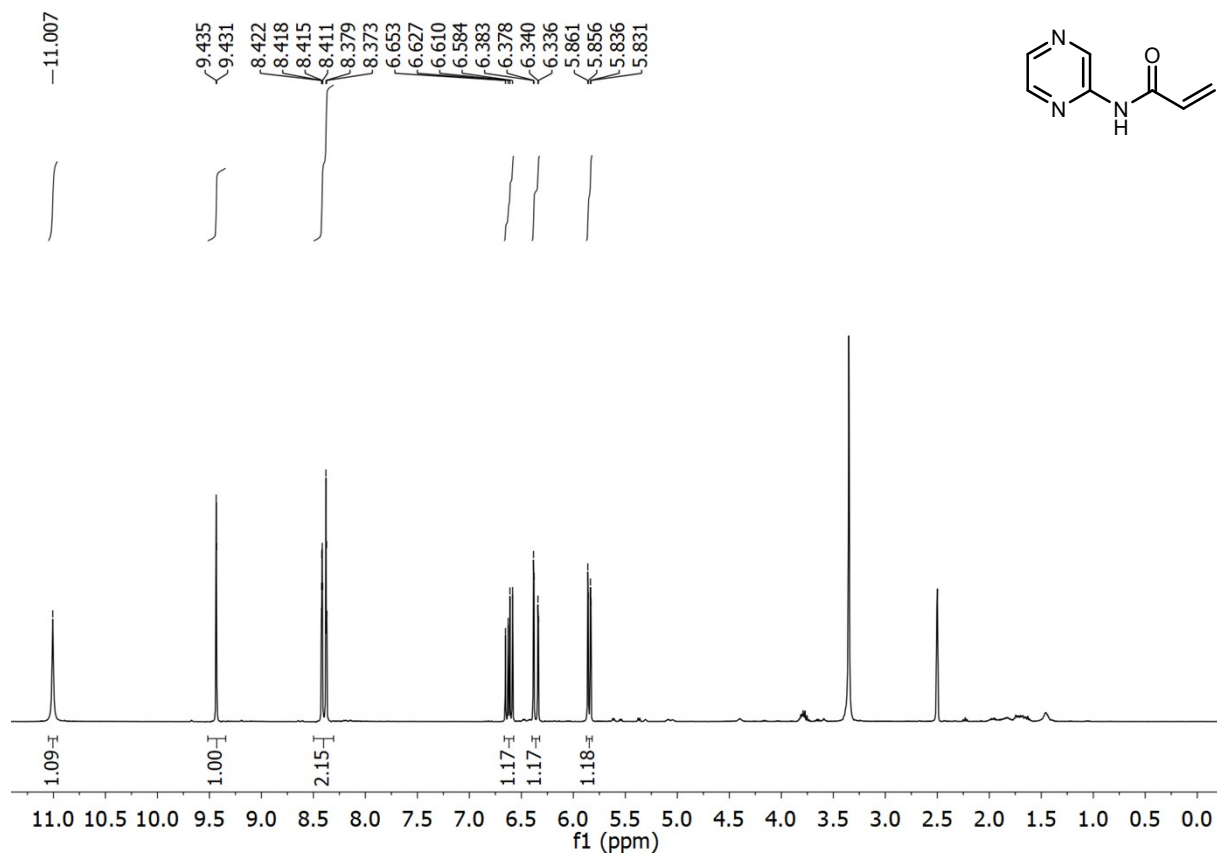

**Figure S83.**  $^1\text{H}$  NMR spectrum (400 MHz,  $\text{DMSO-}d_6$ ) of S3.

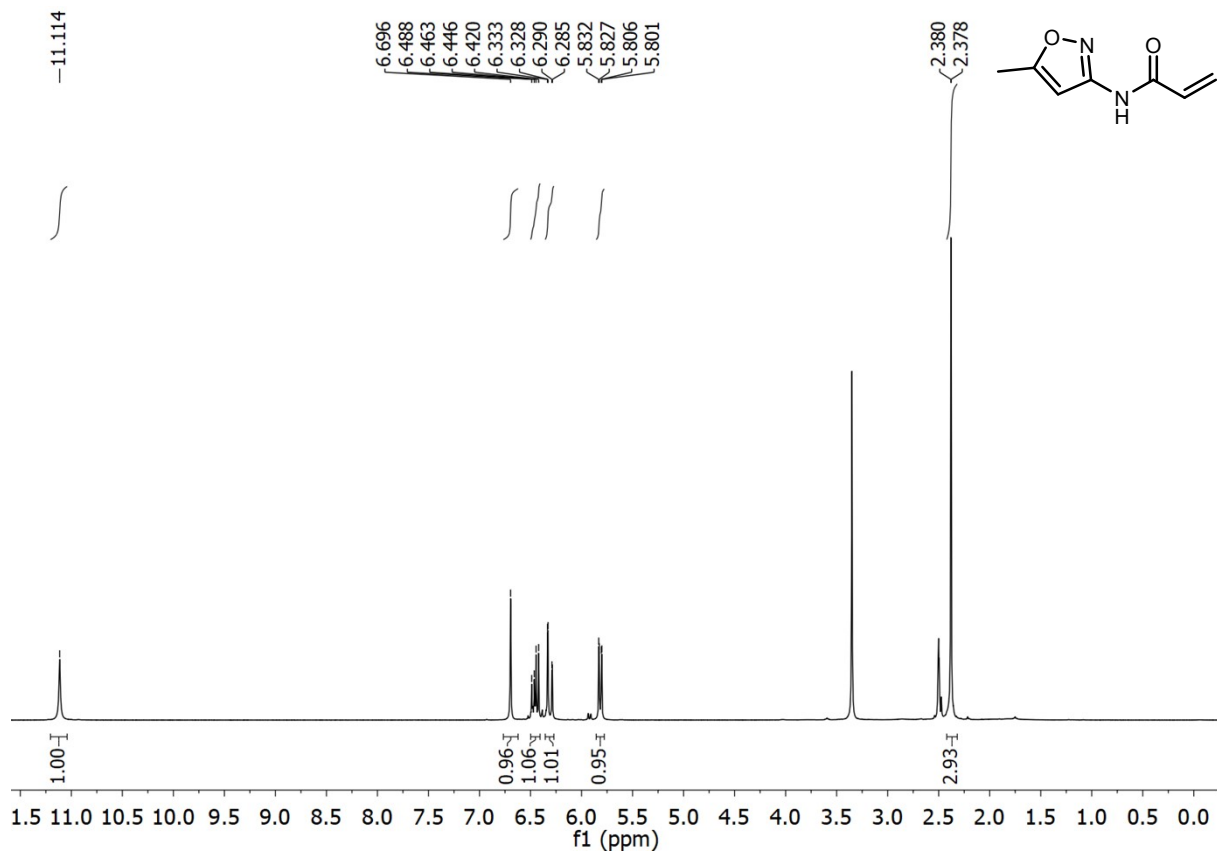

**Figure S84.**  $^1\text{H}$  NMR spectrum (400 MHz,  $\text{DMSO-}d_6$ ) of S4.

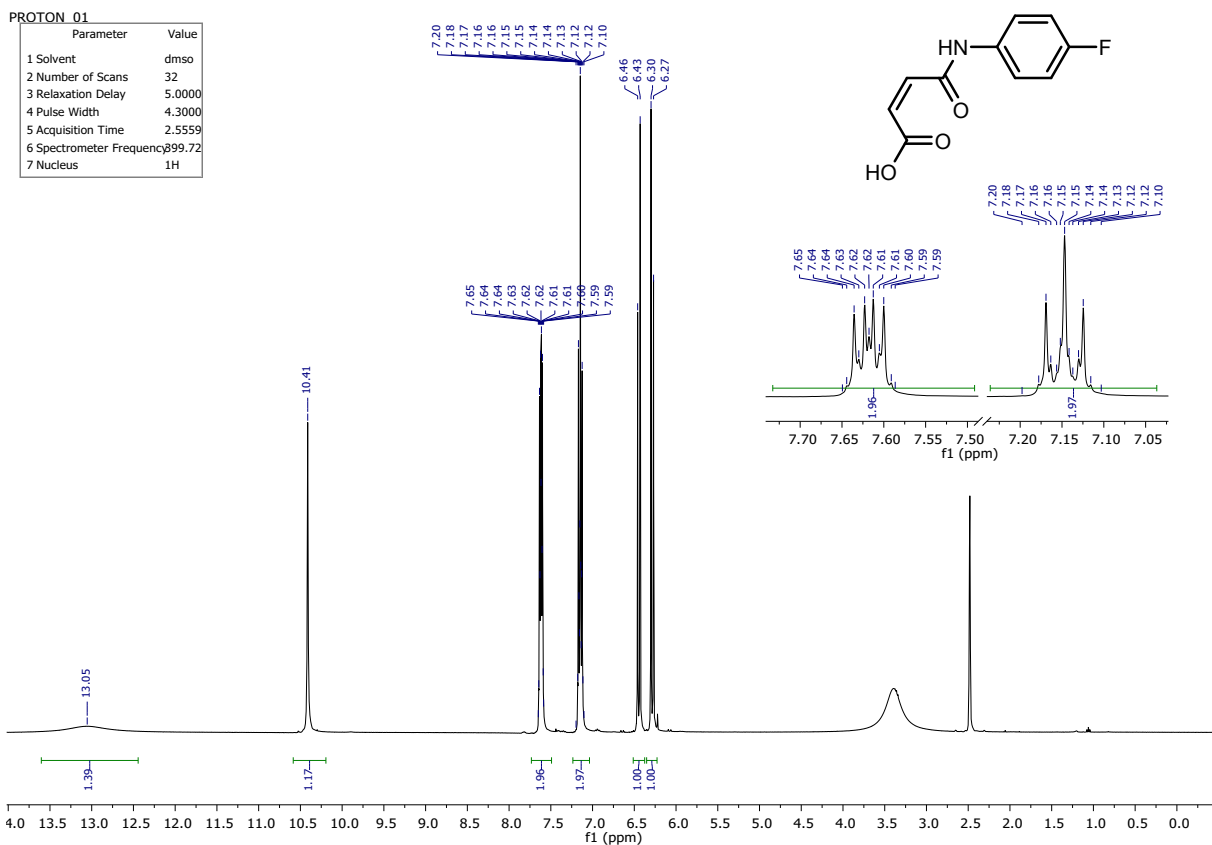

**Figure S85.** <sup>1</sup>H NMR spectrum (400 MHz, DMSO-*d*<sub>6</sub>) of S5.

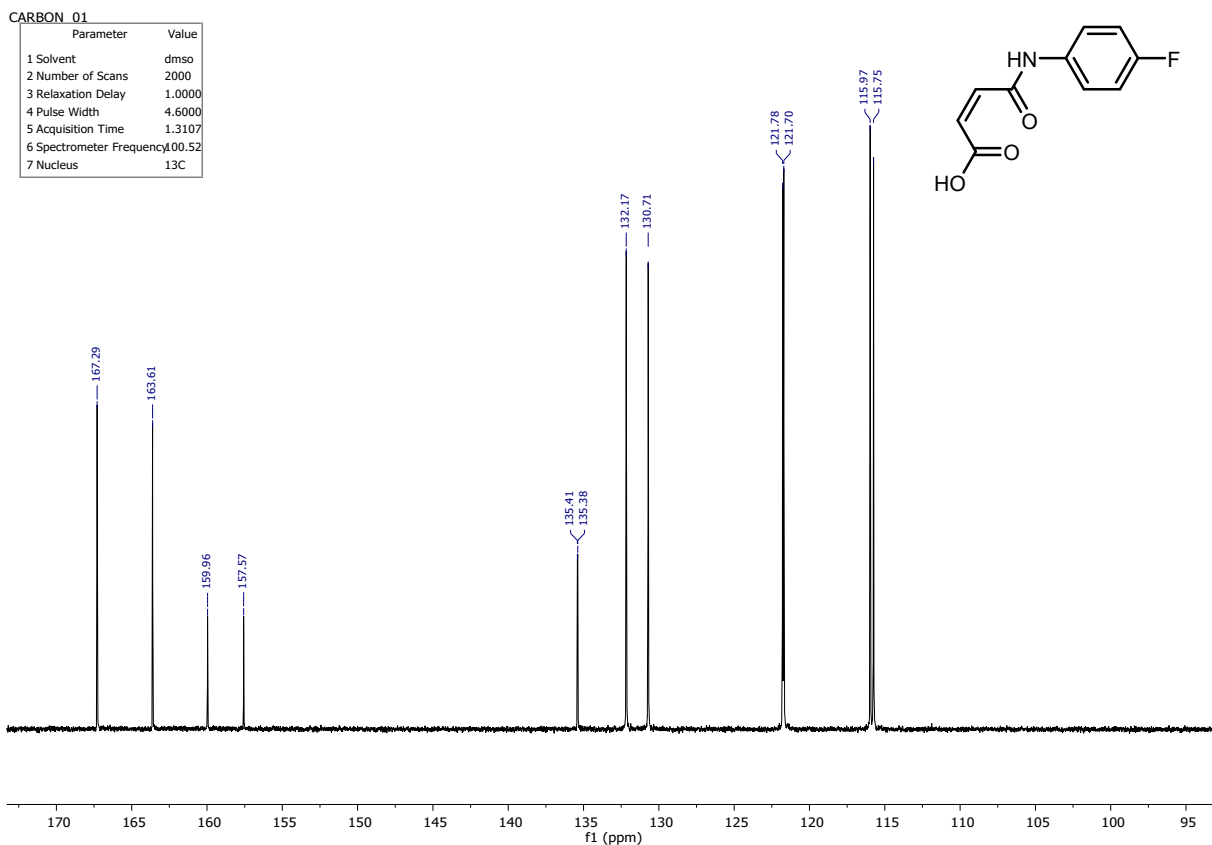

**Figure S86.** <sup>13</sup>C NMR spectrum (101 MHz, DMSO-*d*<sub>6</sub>) of S5.

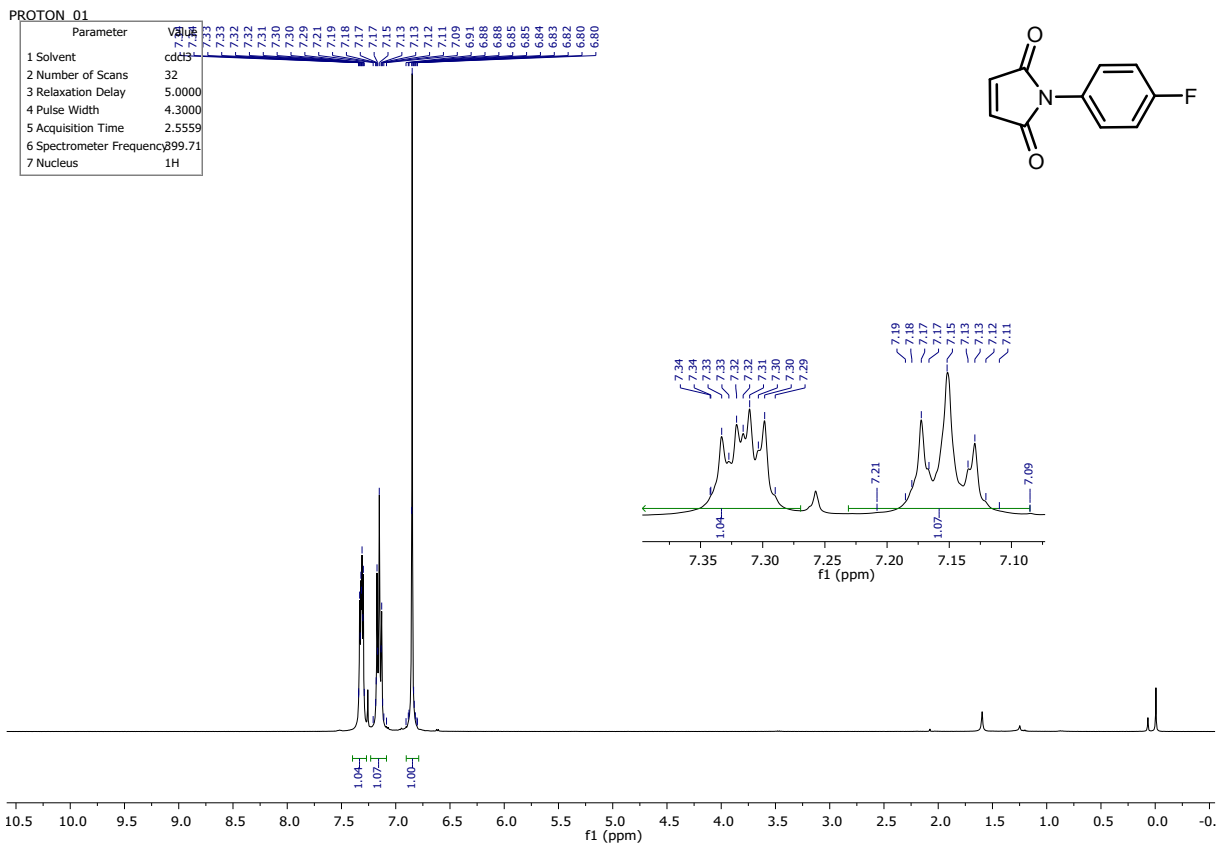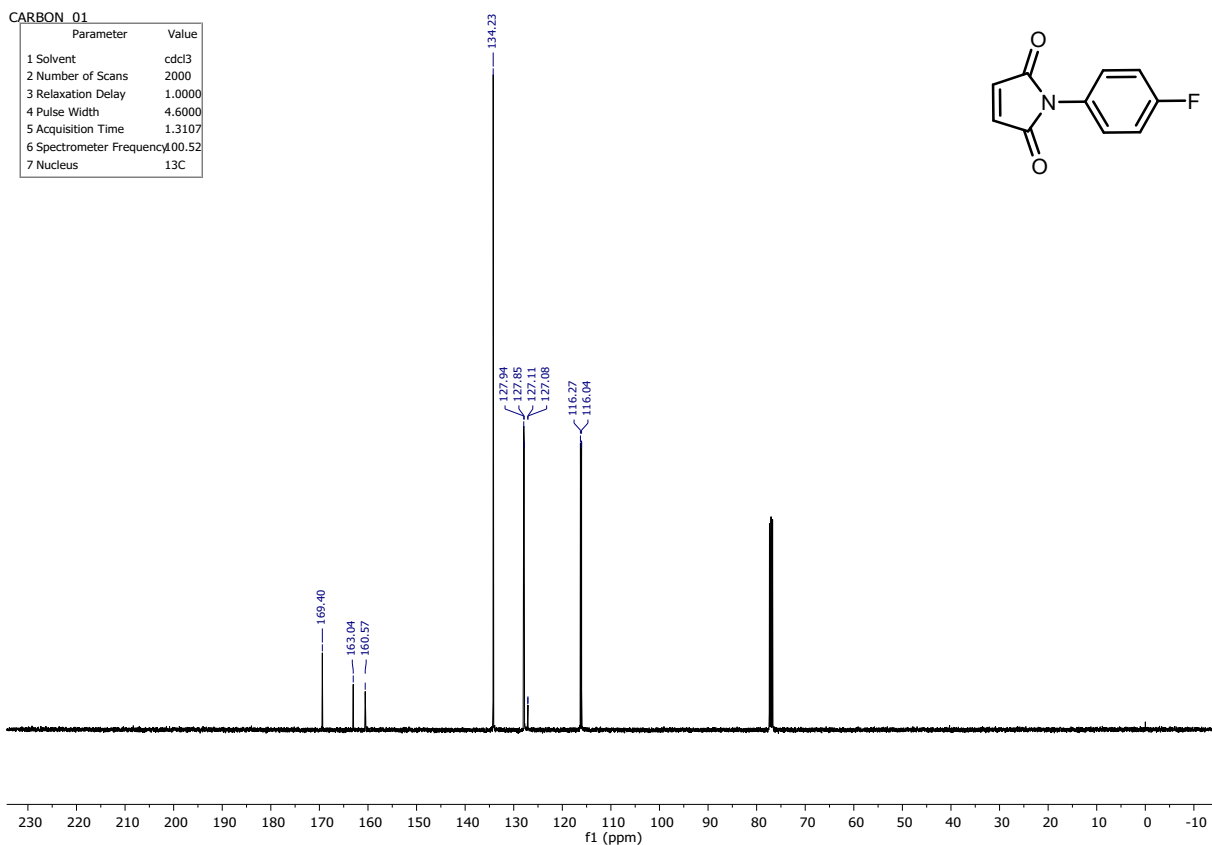

PROTON\_01

| Parameter                | Value          |
|--------------------------|----------------|
| 1 Solvent                | acetone        |
| 2 Number of Scans        | 32             |
| 3 Relaxation Delay       | 5.0000         |
| 4 Pulse Width            | 4.3000         |
| 5 Acquisition Time       | 2.5559         |
| 6 Spectrometer Frequency | 399.72         |
| 7 Nucleus                | <sup>1</sup> H |

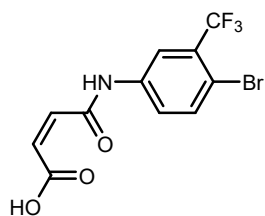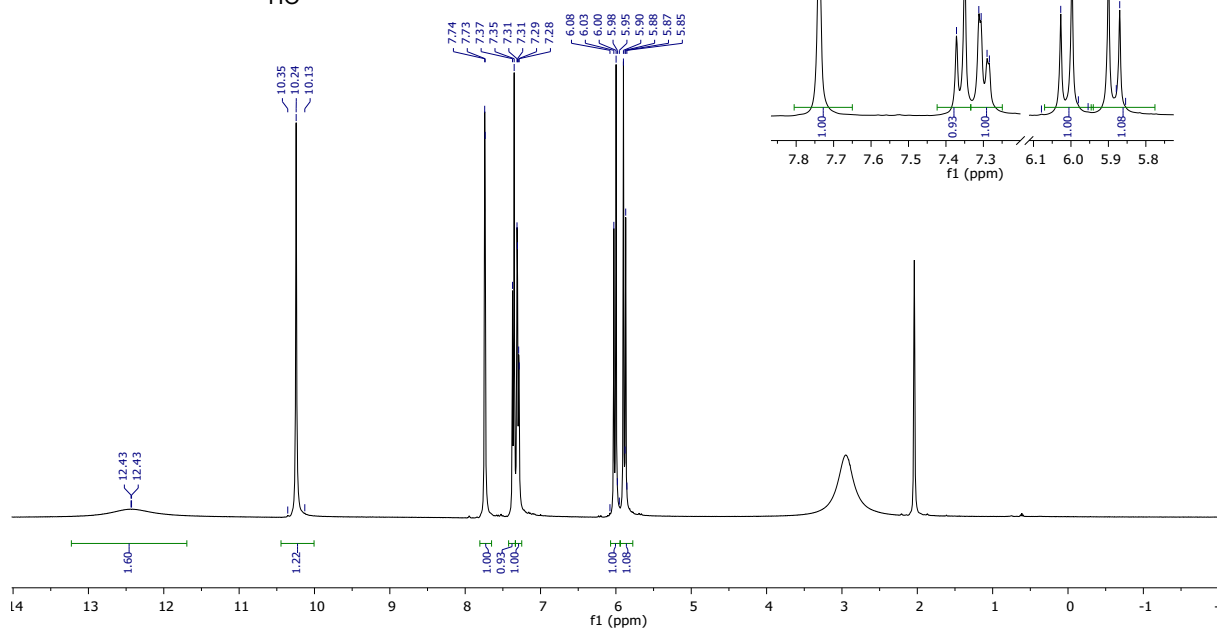

Figure S89. <sup>1</sup>H NMR spectrum (400 MHz, acetone-*d*<sub>6</sub>) of S7.

CARBON\_01

| Parameter                | Value           |
|--------------------------|-----------------|
| 1 Solvent                | acetone         |
| 2 Number of Scans        | 2000            |
| 3 Relaxation Delay       | 1.0000          |
| 4 Pulse Width            | 4.6000          |
| 5 Acquisition Time       | 1.3107          |
| 6 Spectrometer Frequency | 100.52          |
| 7 Nucleus                | <sup>13</sup> C |

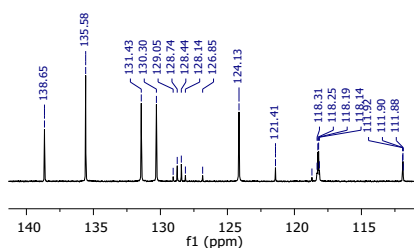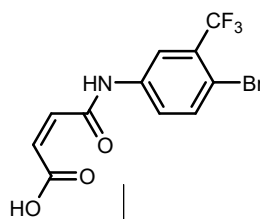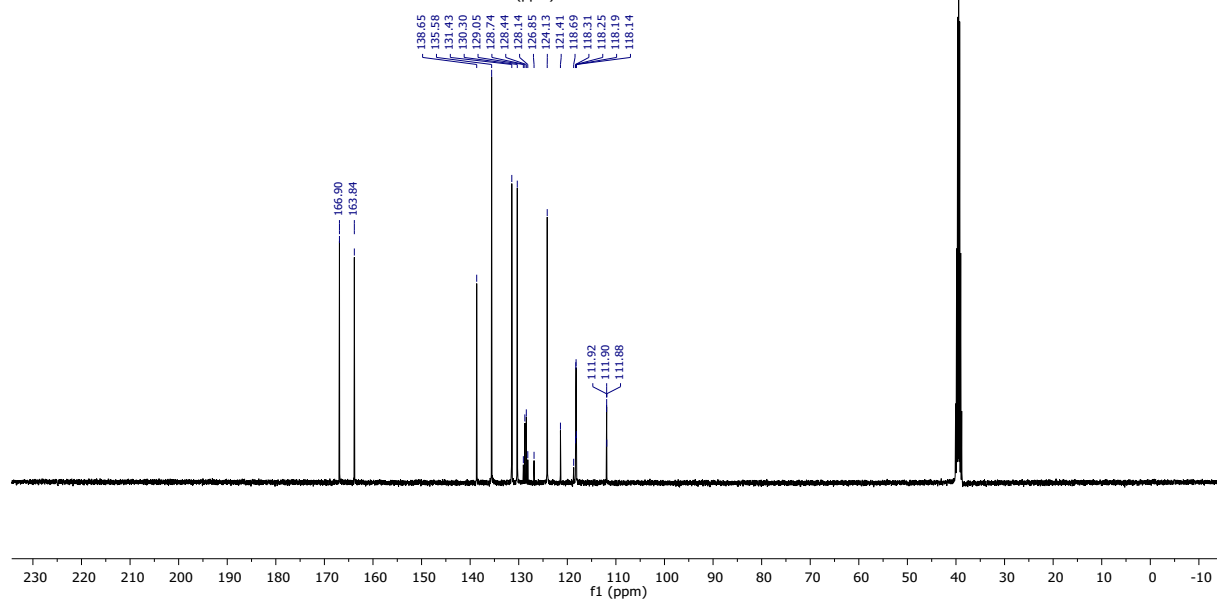

Figure S90. <sup>13</sup>C NMR spectrum (101 MHz, acetone-*d*<sub>6</sub>) of S7.

| PROTON_01                |        |
|--------------------------|--------|
| Parameter                | Value  |
| 1 Solvent                | cdcl3  |
| 2 Number of Scans        | 32     |
| 3 Relaxation Delay       | 5.0000 |
| 4 Pulse Width            | 4.3000 |
| 5 Acquisition Time       | 2.5559 |
| 6 Spectrometer Frequency | 399.71 |
| 7 Nucleus                | 1H     |

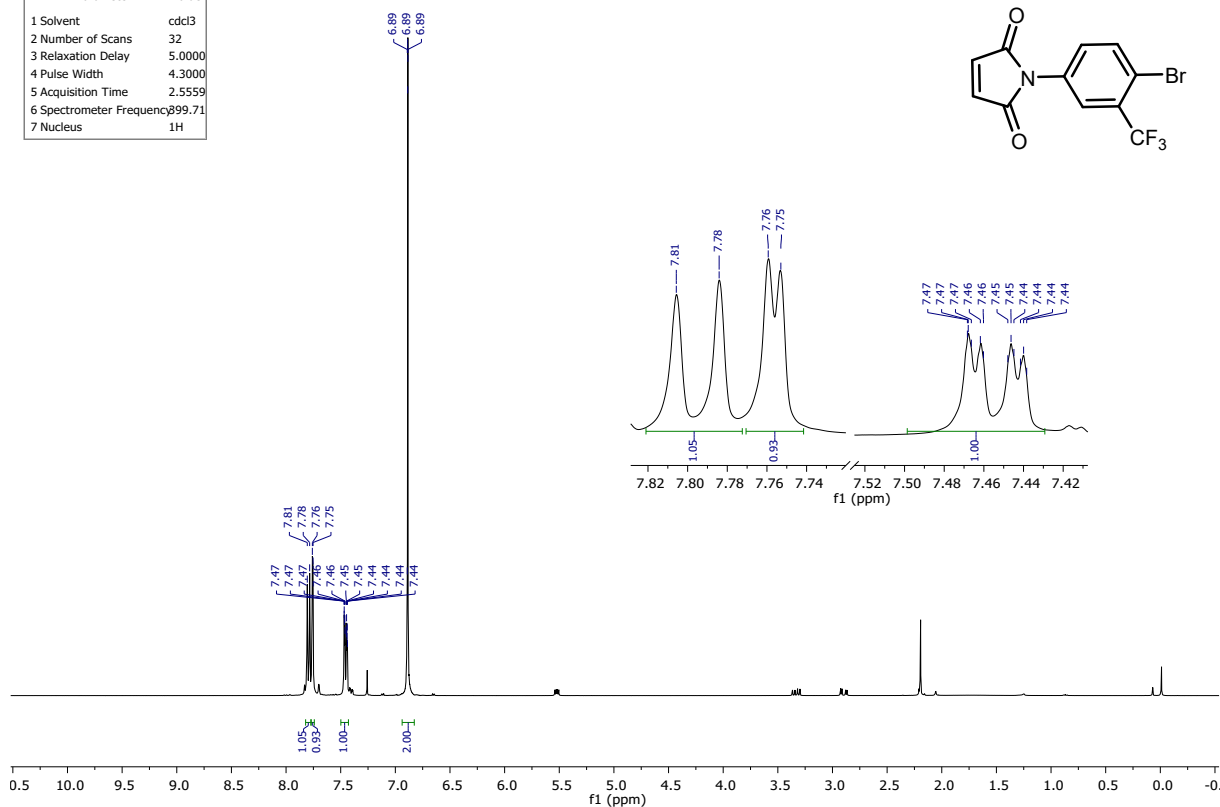

Figure S91. <sup>1</sup>H NMR spectrum (400 MHz, CDCl<sub>3</sub>) of S8.

| CARBON_01                |        |
|--------------------------|--------|
| Parameter                | Value  |
| 1 Solvent                | cdcl3  |
| 2 Number of Scans        | 2000   |
| 3 Relaxation Delay       | 1.0000 |
| 4 Pulse Width            | 4.6000 |
| 5 Acquisition Time       | 1.3107 |
| 6 Spectrometer Frequency | 100.52 |
| 7 Nucleus                | 13C    |

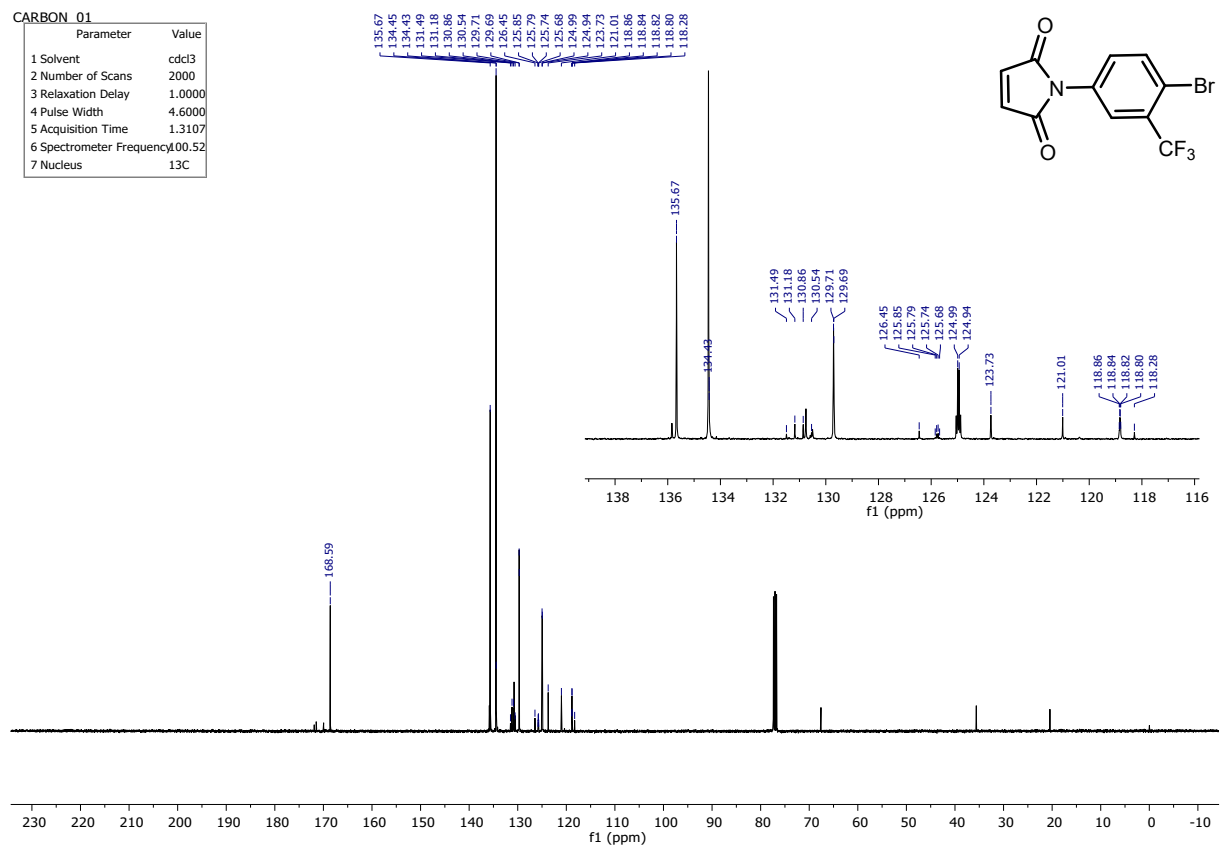

Figure S92. <sup>13</sup>C NMR spectrum (101 MHz, CDCl<sub>3</sub>) of S8.

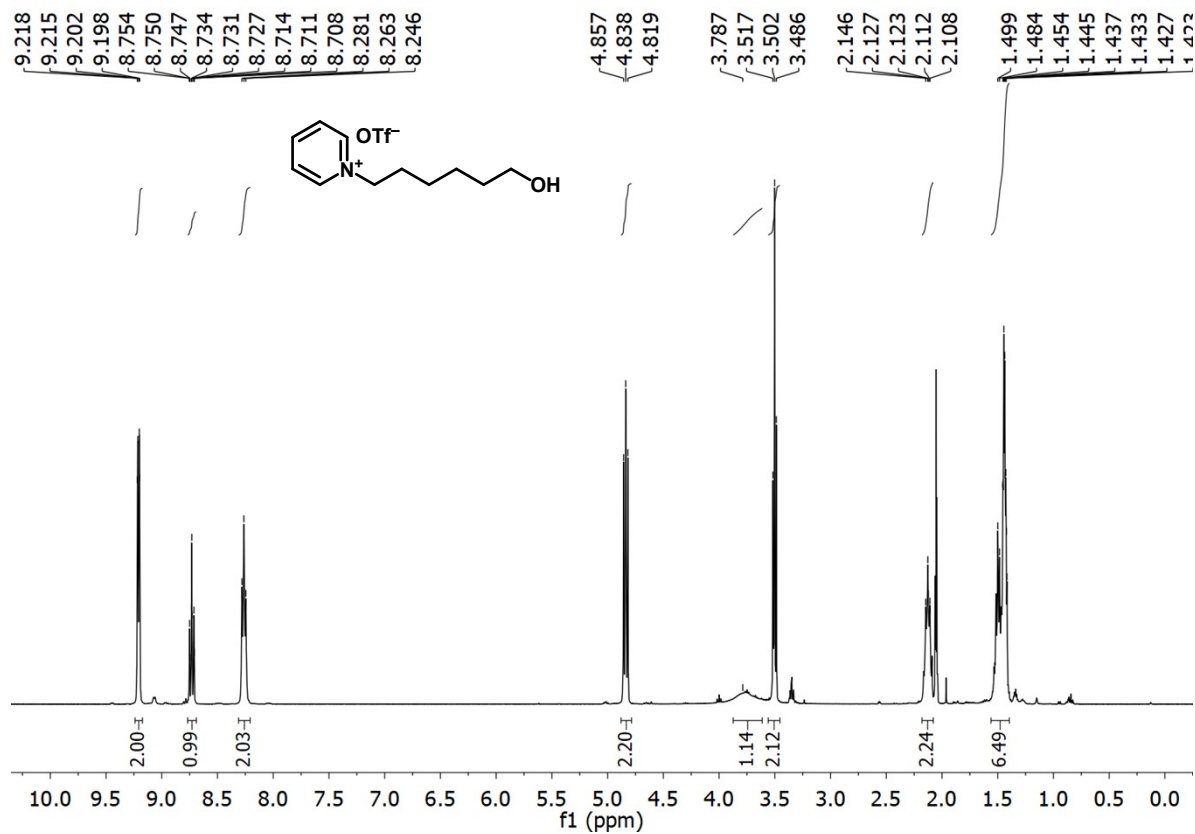

**Figure S93.** <sup>1</sup>H NMR spectrum (400 MHz, DMSO-*d*<sub>6</sub>) of S9.

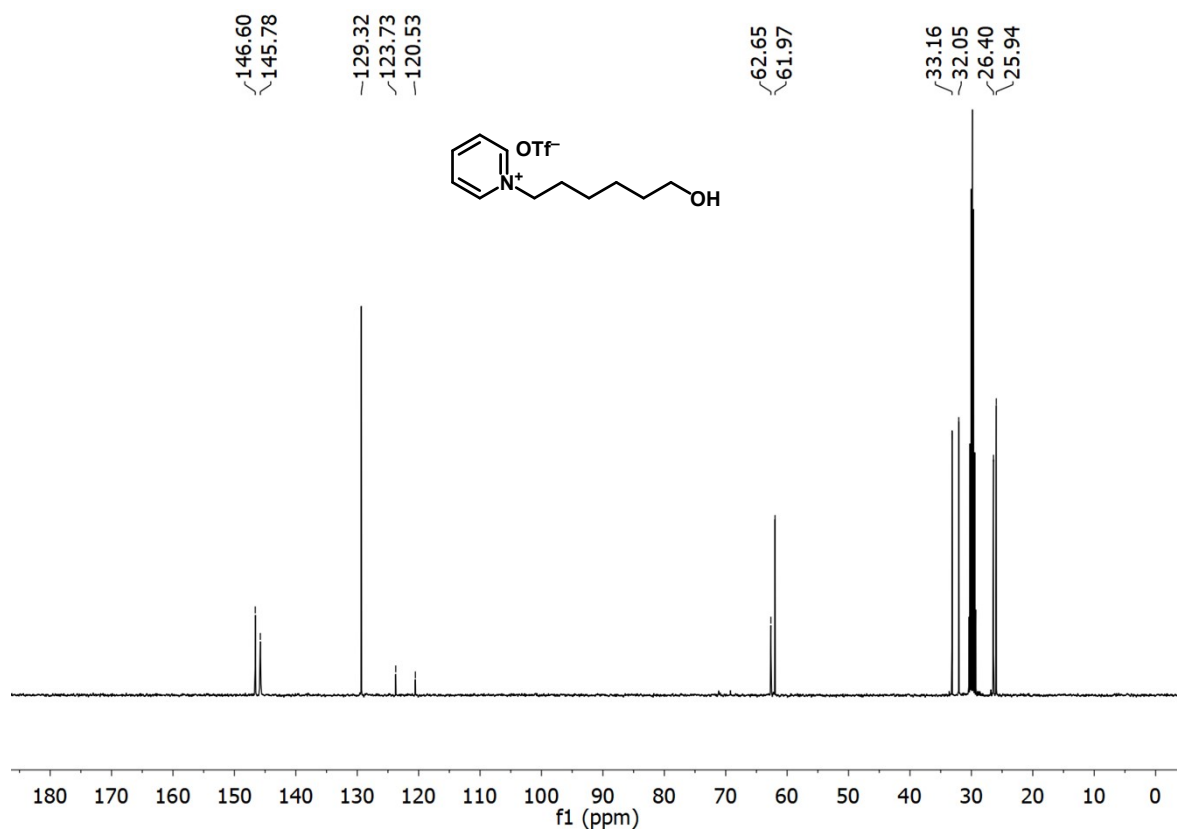

**Figure S94.** <sup>13</sup>C NMR spectrum (101 MHz, DMSO-*d*<sub>6</sub>) of S9.

| PROTON_01                |        |
|--------------------------|--------|
| Parameter                | Value  |
| 1 Solvent                | cdcl3  |
| 2 Number of Scans        | 16     |
| 3 Relaxation Delay       | 1.0000 |
| 4 Pulse Width            | 5.0000 |
| 5 Acquisition Time       | 2.5559 |
| 6 Spectrometer Frequency | 99.90  |
| 7 Nucleus                | 1H     |

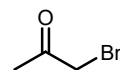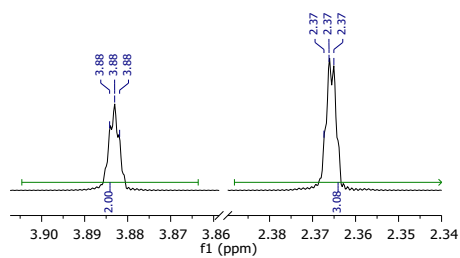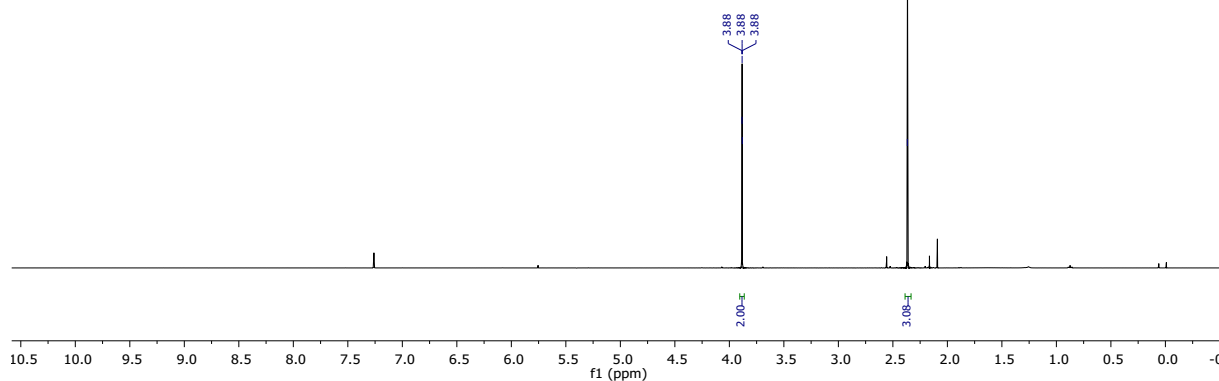

Figure S95.  $^1\text{H}$  NMR spectrum (400 MHz,  $\text{CDCl}_3$ ) of S10.

| PROTON_01                |        |
|--------------------------|--------|
| Parameter                | Value  |
| 1 Solvent                | cdcl3  |
| 2 Number of Scans        | 16     |
| 3 Relaxation Delay       | 1.0000 |
| 4 Pulse Width            | 5.0000 |
| 5 Acquisition Time       | 2.5559 |
| 6 Spectrometer Frequency | 99.90  |
| 7 Nucleus                | 1H     |

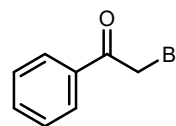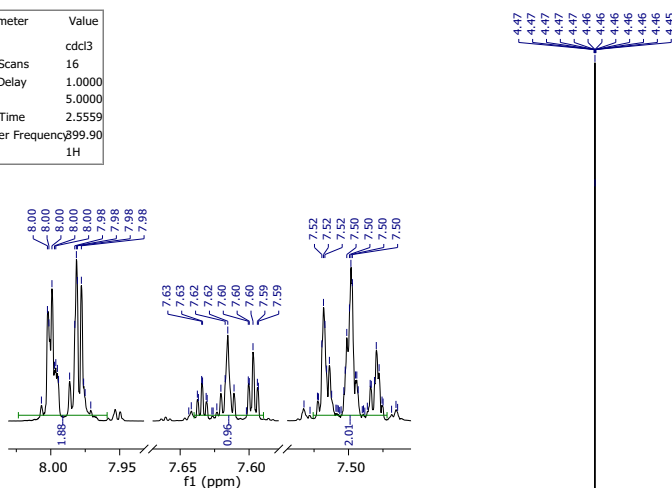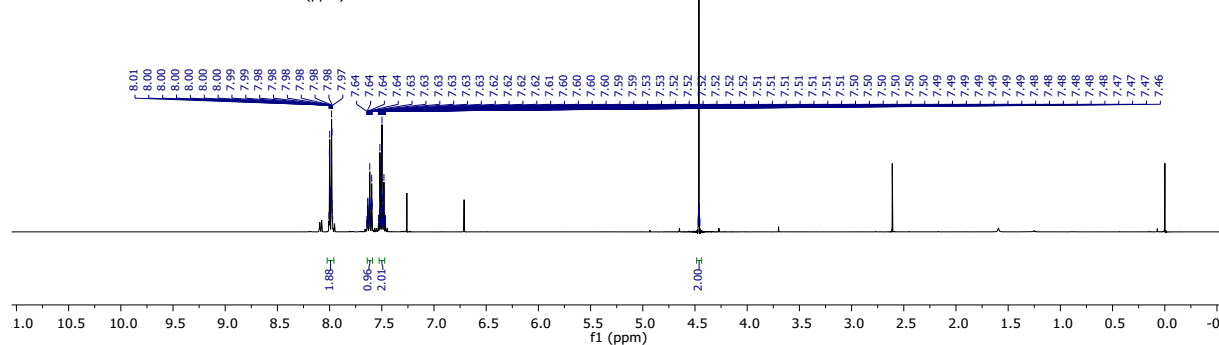

Figure S96.  $^1\text{H}$  NMR spectrum (400 MHz,  $\text{CDCl}_3$ ) of S11.



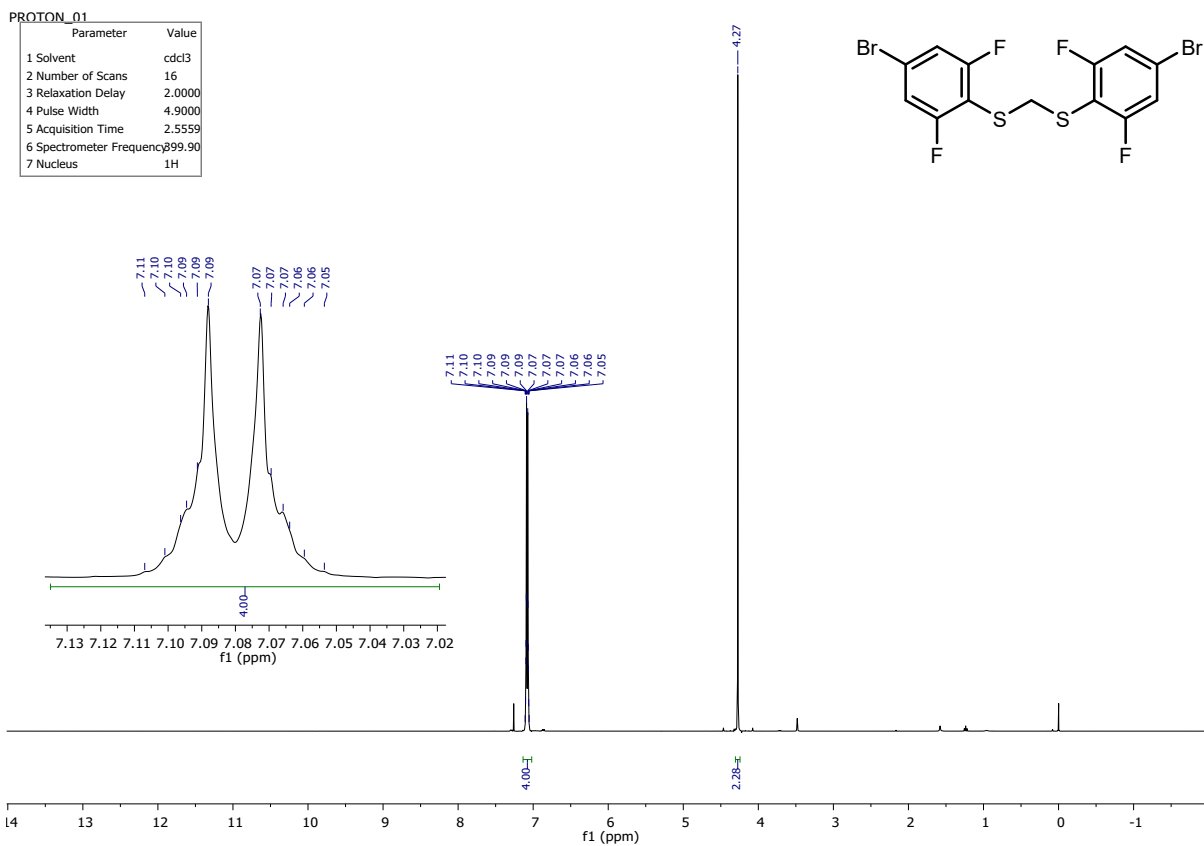

**Figure S97.**  $^1\text{H}$  NMR spectrum (400 MHz,  $\text{CDCl}_3$ ) of **1b\_CH2**.

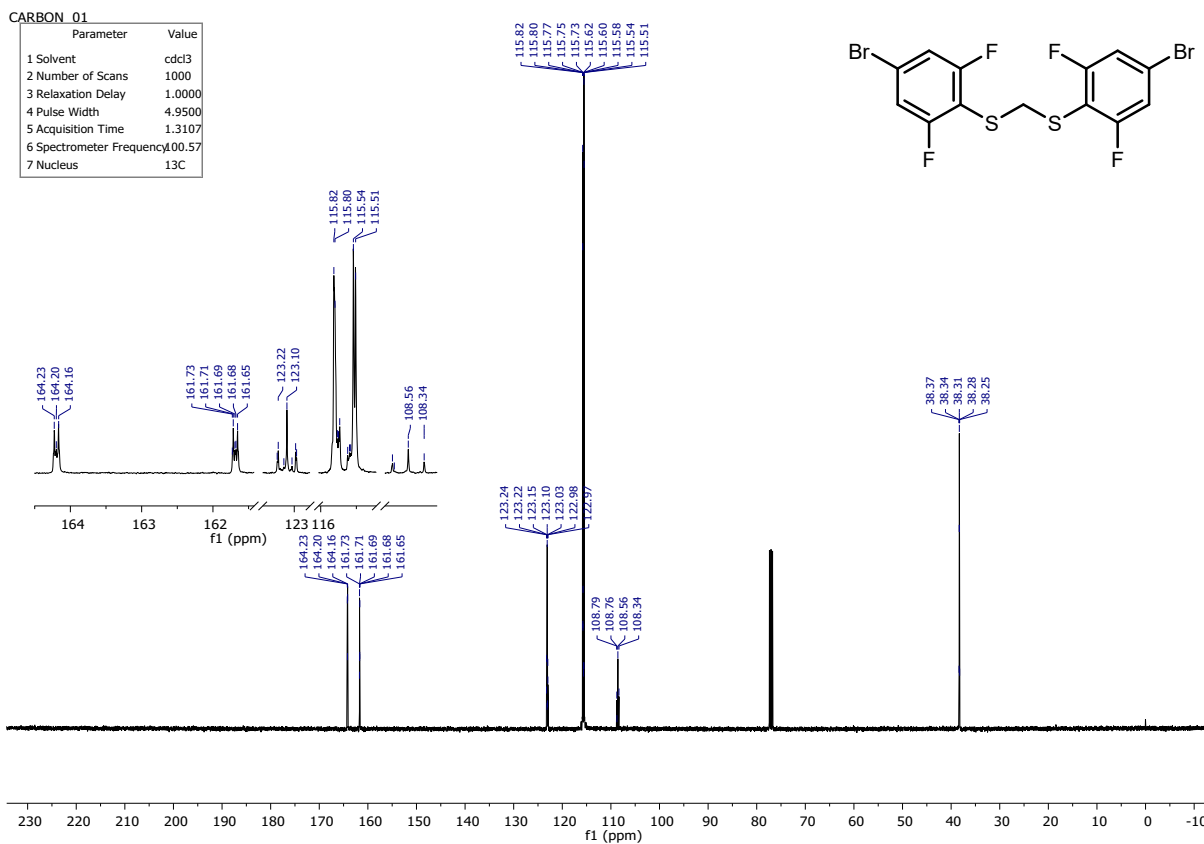

**Figure S98.**  $^{13}\text{C}$  NMR spectrum (101 MHz,  $\text{CDCl}_3$ ) of **1b\_CH2**.

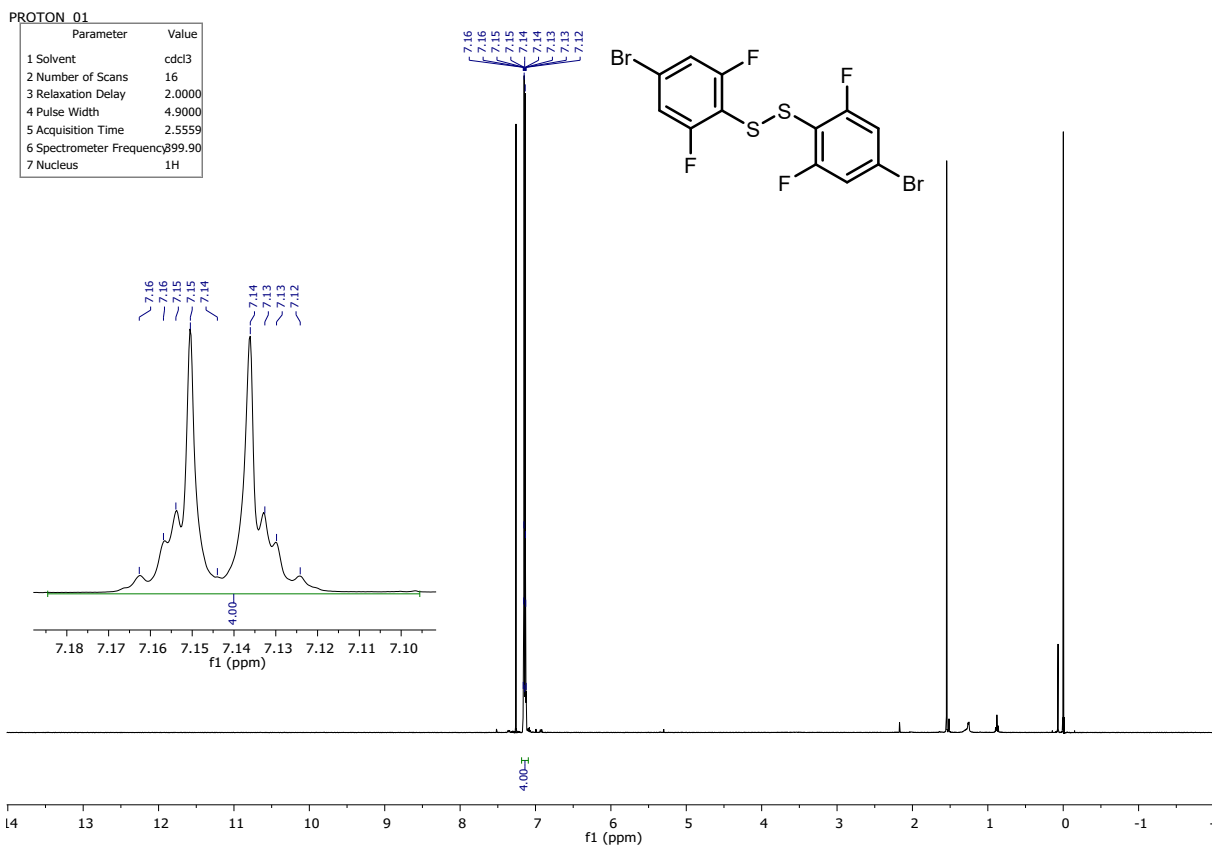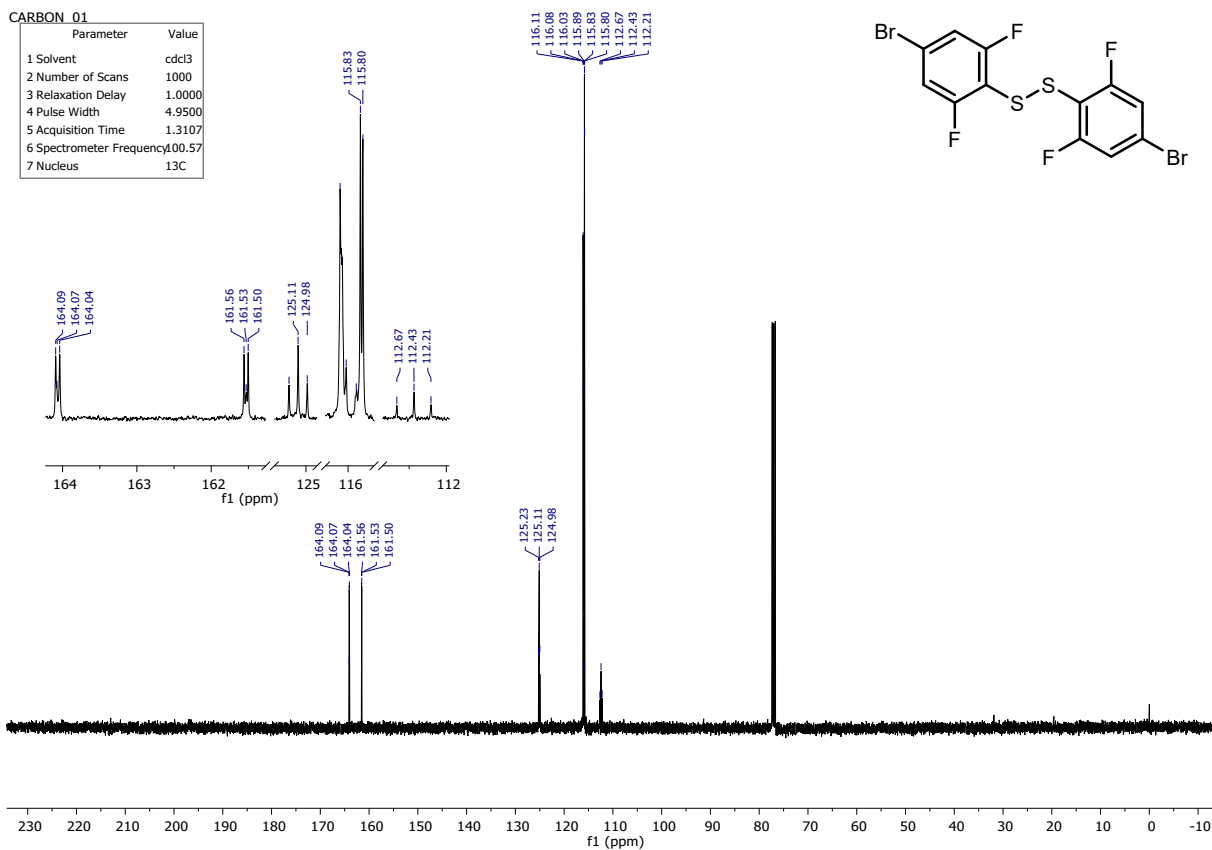

Supplement: d4md00061g1.pdf [file d4md00061g1.pdf]
